# Long term analysis of social structure: evidence of age-based consistent associations in Alpine ibex

Alice Brambilla<sup>a,b</sup>, Achaz von Hardenberg<sup>c</sup>, Cédric Sueur<sup>d,e</sup>, Claudia Canedoli<sup>f</sup>, Christina R Stanley<sup>c</sup>

<sup>a</sup> Department of Evolutionary Biology and Environmental Studies, University of Zurich, Switzerland

<sup>b</sup> Alpine Wildlife Research Center, Gran Paradiso National Park, Italy

<sup>c</sup> Conservation Biology Research Group, Department of Biological Sciences, University of Chester, UK

<sup>d</sup> Université de Strasbourg, CNRS, IPHC UMR 7178, F-67000 Strasbourg, France

<sup>e</sup> Institut Universitaire de France, Saint-Michel 103, F-75005 Paris, France

<sup>f</sup> Department of Earth and Environmental Sciences, University of Milano Bicocca, Italy

Corresponding Author:

Alice Brambilla [alicebrambilla1@gmail.com](mailto:alicebrambilla1@gmail.com), +39 3289230658

Address: Y13-J-34, Department of Evolutionary Biology and Environmental Studies, University of Zurich. Winterthurerstrasse 190, CH-8057 Zurich (CH).

ORCID ID 0000-0003-3061-9544

## ABSTRACT

Despite its recognized importance for understanding the evolution of animal sociality as well as for conservation, long term analysis of social networks of animal populations is still relatively uncommon. We investigated social network dynamics in males of a gregarious mountain ungulate (Alpine ibex, *Capra ibex*) over ten years focusing on groups, sub-groups and individuals, exploring the dynamics of sociality over different scales. Despite the social structure changing between seasons, the Alpine ibex population was highly cohesive: fission-fusion dynamics lead almost every male in the population to associate with each other male at least once. Nevertheless, we found that male Alpine ibex showed preferential associations that were maintained across seasons and years. Age seemed to be the most important factor driving preferential associations while other characteristics, such as social status, appeared less crucial. We also found that centrality measures were influenced by age and were also related to individual physical condition. The multi-scale and long-term frame of our study helped us show that ecological constraints, such as resource availability, may play a role in shaping associations in a gregarious species, but they cannot solely explain sociality and preferential association that are likely also to be driven by life-history linked physiological and social needs. Our results highlight the importance of long-term studies based on individually recognizable subjects to help us build on our understanding of the evolution of animal sociality.

**Keywords:** Age-based preference, Alpine ibex, *Capra ibex*, fission-fusion dynamic, mountain ungulates, Social Network Analysis

## INTRODUCTION

Understanding the drivers of spatial and temporal interactions between animals is of great importance to some of the most pressing questions in biology, such as understanding the evolution of animal sociality (Couzin and Laidre 2009), determining how genetic and cultural information spread within and among inter-connected populations (Van de Waal and Bshary 2011), tracking disease transmission (MacIntosh et al. 2012; Marchand et al. 2017; Silk et al. 2019), and predicting the invasion dynamics of introduced species (Fogarty et al. 2011).

In many social species, the process of group formation is highly dynamic, with frequent changes in group size and composition (Grueter et al. 2020). Groups can merge (fusion) or split (fission) over time and space, making group composition a dynamic property (Sueur et al. 2011). Social systems characterized by fission-fusion dynamics are widespread among vertebrates as for example fish (*Poecilia reticulata*, Wilson et al. 2014), birds (Silk et al. 2014; Papageorgiou and Farine 2020) and several mammals including primates (Smuts et al. 1987), Bechstein's bats (*Myotis bechsteinii*, Kerth and König 1999), bottlenose dolphins (*Tursiops spp.*, Connor et al. 2000), spotted hyenas (*Crocuta crocuta*, Holekamp et al. 1997), African elephants (*Loxodonta africana*, Wittemyer et al. 2005), giraffes (*Giraffa camelopardalis*, Bond et al. 2019), feral goats (*Capra hircus*, Stanley and Dunbar 2013) and sheep (*Ovis aries*, Jewell et al. 1974). The timescale over which fission-fusion dynamics occur may differ as environmental conditions or individual requirements change (Aureli et al. 2008; Sueur et al. 2011). Indeed, there is pronounced variation in the degree of fission-fusion dynamics both across and within species which can vary from a highly cohesive society with stable group membership to a highly fluid society with either relatively stable or flexible subgroup membership (Aureli et al. 2008). The flexibility of fission-fusion dynamics is likely to have evolved because it allows individuals to optimize the costs and benefits of group-living (Moscovice et al. 2020). Fission-fusion dynamics are predicted to be most frequent in

environments with spatial variability and to increase with temporal uncertainty and unpredictability of the environment (Sueur et al. 2011). Other factors known to influence the structure and cohesion of groups are demographic processes such as deaths, births, dispersal and immigration (Ilany and Akçay 2016) that may influence social structure through the loss of some social connections and the formation of new ones (Shizuka et al. 2020) as well as by driving changes in patterns of association between remaining individuals (e.g., Flack et al. 2006).

Studies on social systems often focus on the association between individuals, as members of a group can show a preference to associate with specific individuals and maintain certain social links despite the frequent splitting and merging of the overall group. In many social mammals there is a tendency towards homophily, i.e., for individuals to associate with others that share similar characteristics such as age or sex (Carranza 1984, Le Pendu et al. 1995). A possible explanation for these preferences is that the cost of living in groups with members of the same age class or sex is lower due to similar physiological needs and a reduction in harmful inter or intra-sexual interactions (Conradt and Roper 2000; Ruckstuhl and Neuhaus 2000). Likewise, social relationships between individuals may be affected by kinship (Cassinello and Calabuig 2008; Wittenmyer et al. 2009; Podgórski et al. 2014) as well as by social rank as observed in horses (*Equus caballus*, Kimura 1998) and red deer (*Cervus elaphus*, Appleby 1983), where individuals spent more time close to other of similar rank.

Associations can be stable or can change during the life on an individual, varying from long-term or even life-long associations (as shown, e.g., in birds, Teitelbaum et al. 2017; wild boars, *Sus scrofa*, Podgórski et al. 2014; feral horses and ponies, Cameron et al. 2009 and Stanley et al. 2018) to transitory or short-term associations (e.g., in spotted hyenas, Smith et al. 2011). Also the levels of gregariousness can differ between individuals of the same species or population and can be influenced by various factors such as age (Carter et al. 2013; Machanda

et al. 2020) or reproductive status (Fischhoff et al. 2009; Vander Wal et al. 2015; Machanda et al. 2020). This can, however, also be a consistent individual characteristic that is maintained throughout life as recently studies on personality (i.e., the presence of behavioural differences that are repeatable over time and across situations) have shown (e.g., Krause et al. 2010; Firth et al. 2018). Sociability is indeed one of the five personality traits described in literature and it can affect reproductive success and survival and hence fitness (Réale et al. 2007).

Social network analysis (SNA) is a powerful tool that can be applied to the analysis of several aspects of social behaviour (Sueur et al 2011; Sosa et al. 2021b). One of the most attractive features of SNA is that it allows to study the social organisation of animals at all levels (individual, dyad, group, population) and for all types of interaction (e.g., aggressive, cooperative, sexual, Krause et al. 2009), allowing a plethora of novel insights into the evolution and maintenance of sociality to be elucidated (Wey et al. 2008; Pinter-Wollman et al. 2014; Krause et al. 2015; Webber and Vander Wal 2019; Sosa et al. 2021b). As social structure can also affect population growth rates, dispersal and gene flow (Strier 1997), network analysis also has the potential to be an important tool in the management of wild populations (Tarlow and Blumstein 2007; Schakner et al. 2017, Snijders et al. 2017, Welch et al. 2020).

To date, few studies have investigated dynamic changes in social network structures of wild populations in the long term, especially where the individuals composing the network change due to demographic processes (e.g., death, emigration or immigration of individuals, Cantor et al. 2012; Borgeaud et al. 2017). Shizuka et al. (2020) called for the need to integrate demographic processes and consequent social processes into social network analyses. However, the scarcity of such studies is probably due to the intensity of consistent data collection required in order to incorporate environmental and demographic changes or stochastic events, in addition to limitations in the available analytical tools (Pinter-Wollman et al. 2014). Instead, many studies making use of SNA in free ranging populations rely on

relatively short-term datasets and, therefore, are only able to describe snapshots of the social systems. Since long term monitoring of wild species has provided important contributions to the study of ecology and evolution as well as to conservation (Festa-Bianchet et al. 2017, Clutton-Brock 2021), long term analysis of social network dynamics could bring rich rewards in terms of a better understanding of population-level processes (Pinter-Wollman et al. 2014). Ungulate species are widespread in all continents except Antarctica and show high diversity both in terms of size, habitat as well as behaviour (Wilson and Mittermeier 2011). Their social organization has been extensively studied and provided crucial elements for understanding the evolution of vertebrates' social systems (Jarman, 1974, Krause et al. 2002). However, many of the studies on social networks of ungulates have focused on female associations (Vander Wal et al. 2016; Ramos et al. 2019) meaning knowledge on male sociality in ungulates remains scarce. To fill those gaps, in this study we performed a long-term analysis of the social structure of male of a gregarious ungulate: the Alpine ibex (*Capra ibex*). We took advantage of a detailed long-term dataset resulting from ten years of behavioural observations of individually identifiable male Alpine ibex to explore the male social network of a gregarious ungulate and to investigate population-level changes in social structure over time.

The Alpine ibex, a mountain ungulate of conservation concern (Brambilla et al. 2015; 2018; 2020), is a gregarious species that lives in open-membership groups and shows fission-fusion dynamics. Alpine ibex are highly sexually dimorphic and exhibit strong sexual segregation all year round except for during the mating season, that occurs between December and January (Villaret and Bon 1995; Ruckstuhl and Neuhaus 2001). As the degree of sexual segregation increases with male age (Ruckstuhl and Neuhaus 2001), outside the rut, adult males join groups mainly composed of males, while yearlings stay in groups mainly composed of females, and young males ( $\leq 2$ -3 years old) may move between male and female groups.

This study was conducted during spring and summer months, when sexual segregation is at its peak, and focused on the social network of male Alpine ibex. Specifically, we aimed to determine: a) whether males showed consistent associations and which factors influenced the choice of preferred companions; b) which individual characteristics (age, life stage) influenced network metrics at the individual level and if these metrics were consistent over time; c) whether social structure was stable across seasons (i.e., across periods with different ecological conditions); d) whether any changes in the social network structure over time could be explained by demographic factors.

Similarly to observations in other bovids (Vander Wal et al. 2015; Ramos et al. 2019), we expected to find a highly connected and cohesive social network, with all the individuals connected either directly or indirectly. Despite the aforementioned studies having analysed social structure in females, based on field observations we expected similar results also for males. Age was expected to predict certain network node-based measures (Turner et al. 2018; Sosa et al. 2021b). Particularly, we expected adult males to occupy the more central positions in the network due to their reproductive status and generally higher rank. In addition, we expected males to become less central once they had passed their reproductive peak due to their decreased competitive ability. Age often underpins social preferences (e.g., Wey and Blumstein 2010; Welch et al. 2019); we therefore expected stronger associations between males of the same age class due to their similarity in body size, social motivation, and behaviours. At the same time, and as rank-based homophily was observed in other species (Sosa 2016), we also expected stronger associations between males with similar social rank.

At the population level, we wanted to verify if the structure of the social network remained stable between seasons and between years over a period of ten years. Environmental conditions during the study period were reasonably stable within seasons so we did not expect variations in global network measures. However, as more experienced, older individuals are expected to

help maintain group cohesion (Allen et al. 2020), we expected to find a correlation between global centrality measures and the proportion of old males in the population which could change due to stochastic events (e.g., harsh winters).

## **METHODS**

### **Study area and population**

The study was conducted on a free-ranging population of Alpine ibex in the Levionaz basin (Valsavarenche valley, AO), within the Gran Paradiso National Park (North-western Italian Alps - 45°26' N, 7°08' E).

In the study site, ibex are captured and individually marked with coloured plastic ear tags (Allflex®: Allflex Europe (UK), 77 Greenchurch Street, London) in the framework of a long-term study on the life-history and conservation of the species (Bassano et al. 2003; Bergeron et al. 2010; Brambilla and Brivio 2018). The capture and marking protocol used in this study has been authorised by the Italian Ministry of Environment (authorisation nr. 25114 of 21/09/2004) after the positive review by the Italian National Institute for Environmental Protection and Research (ISPRA) and was developed trying to minimize the effects on the welfare of the animals (Brambilla et al. 2013; Brivio et al. 2015).

The mean number  $\pm$  SD of individuals counted in the Levionaz population during the 10 years of this study was  $180 \pm 41$  of which  $63.9 \pm 10.8$  were males (table 6). Censuses were conducted every year in July block-counts by the personnel of Gran Paradiso National Park. The proportion of marked males varied from a minimum of 50% in 2017 to a maximum of 88% in 2011 and 2012 for a total of 111 marked individuals observed during the study.



## **Data collection**

Data were collected for male Alpine ibex during a period of ten years from 2008 to 2017 in spring (May-June) and summer (July-Aug-Sept). As Alpine ibex perform yearly altitudinal migration following the green up of the vegetation (Parrini et al. 2003), exact dates of the seasonal ranges varied between years and were selected according to the altitudinal movement of the animals on the study site.

## ***Individual attributes***

*Age.* The age of the marked individuals was determined at capture by counting the number of annual horn segments (Brambilla and Canedoli 2014). The age class of the unmarked individuals was estimated by using binoculars to count the number of annual horn segments. Unmarked individuals were divided in age classes, defined as follows based on clearly visible body mass differences (Couturier 1962): 2-5 years old (young); 6-8 years old (sub-adults); 9-11 years old (fully grown adults); >11 years old (old individuals).

*Season preceding death.* Male Alpine ibex adult survival is very high and most of them reach senescence (Toïgo et al. 2007). However, some individuals die earlier and, particularly in case of chronic diseases, their behaviour could change in the months preceding death. We therefore recorded all deaths of identified individuals to obtain a binary variable “season preceding death”; this indicated whether the animal died within that year of data collection or if it survived until the following year. This was possible as carcasses of dead individuals were often found in the field within a few days of death. When possible, the cause of death was also ascertained. Some individuals’ carcasses, however, were not found. This happened especially when animals died during winter or in an inaccessible part of the study area. If an animal was not observed in the study site nor in the surrounding areas (monitored daily by park rangers) for a whole year, we considered it as dead. We could not exclude that some of those individuals migrated;

however, as all the animals included in our study were observed several times every year and their movements were rather predictable, we were confident in considering them as dead if they were not observed again. Indeed, during the time of our study, we had no cases of animals that were observed again in our or in other study areas after one whole year when they were not observed.

### ***Male associations***

Association patterns between individuals were defined via the ‘gambit of the group’ method (Whitehead 2008), i.e., assuming that each animal in a group is associating with every other individual in that group (Croft et al. 2008; Franks et al. 2010). Association data were collected daily when the animals were active/feeding (when possible, twice per day, after dawn and before dusk, but time and number of daily observations varied based on seasonal and weather conditions). Details on the number of surveys per season are provided in supplementary material S0. Data were collected by an observer scanning the study area while walking along transects consisting of the GPNP paths used during block counts. Transect routes changed during the season according to the altitudinal movement of the animals in the study site (Parrini et al. 2003). Each session of data collection lasted around one to three hours depending on the location of the animals. Every year, data were collected by two to four observers. New observers were trained and tested by the same person that was present for the whole duration of the study. Before new observers could start collecting data, blind contemporary data collection with the expert observer was conducted for up to one week, until consensus in group identification was reached. For each group, the total number of individuals, ID of the marked individuals and age class of the unmarked individuals were recorded. Two groups were considered as distinct if their closest members were more than 50 metres apart. This threshold was set after field observations considered this distance sufficient to avoid social interactions

during random movements while foraging. Any animal observed alone was considered to be a separate group. Data on association were used to build association matrices for each season of each year (see the data analysis paragraph for details).

### ***Male dominance***

All observed agonistic interactions when an individual was clearly dominant over another, as defined by Bergeron et al. (2009), were recorded using all occurrence sampling (Altmann 1974). Agonistic interactions were collected opportunistically during the group composition data collection as well as during focal samples conducted for other studies. The identity of the winner and loser in each interaction was recorded, allowing dominance matrices to be built based on the frequency of dominance interactions per dyad. If the identity of one or both of the individuals involved in the interaction was unknown, this interaction was not included in the matrix.

The outcome of agonistic interactions was also used to calculate hierarchical rank via the Elo-rating method (Elo 1978, Albers and De Vries 2001, Neumann et al. 2011). This method is based on the sequence in which interactions occur and continuously updates ratings by looking at interactions sequentially (Neumann et al. 2011). As previous analysis showed that hierarchical ranks are established early in spring and remain rather stable during summer, we calculated the Elo score (R package EloRating, Neumann et al. 2011) for each individual as of the 30<sup>th</sup> of June of each year in which the individual was observed.

## Network analysis

### *Association networks*

The association network was built based on the half weight index (HWI; Whitehead 2008).

HWI is defined as:

$$HWI = \frac{X}{X + 0.5(Y_a + Y_b) + Y_{ab}} \quad (1)$$

where  $X$  is the number of sampling periods during which individuals  $a$  and  $b$  were observed together,  $Y_a$  is the number of sampling periods when  $a$  was observed without  $b$ ,  $Y_b$  is the number of sampling periods in which  $b$  was observed without  $a$ , and  $Y_{ab}$  is the number of sampling periods when  $a$  and  $b$  were both observed separately (Whitehead, 2008). The HWI is considered to be less biased when not all associating individuals can be identified (Whitehead 2008) and it was chosen as association index to account for the unequal detection probability typical of gregarious mountain ungulates (Vander Wal et al. 2015) and for potential uneven sampling between individuals. As ecological conditions (e.g., resource quality and distribution, temperatures, precipitations) change during the year and Alpine ibex perform seasonal altitudinal migrations (Parrini et al. 2003), the HWI for each pair of individuals was calculated separately for spring and summer of each year (2008-2017) resulting in 20 time-aggregated association matrices (for details on the methods and tools used to build the networks, see the data analysis section).

### *Dominance networks*

Dominance networks were built using the absolute frequency of dominance interactions between each pair of individuals within each season and year (as we assume that our method allowed random sampling of dominance interactions), resulting in 20 dominance networks. Dominance networks were non-symmetrical as the directionality of the dominance resulting from the interaction was preserved.

## Network metrics

To analyse the network structure of male Alpine ibex, we used the metrics described below.

*Individual-level metrics: strength centrality and eigenvector centrality* were calculated for each individual in each network and averaged among individuals for each network. *Strength centrality* is calculated as the sum of the weights of the edges in a weighted network (Wasserman and Faust 1994). This measure represents the sociality of an individual as it estimates the frequency of its interactions (Sosa et al. 2021a) and it was also used to compute gregariousness at the group level (see *Global metrics* section). *Eigenvector centrality* is defined as the first non-negative eigenvector value obtained by transforming an adjacency matrix linearly (Wasserman and Faust 1994). It measures the centrality of a node by examining its connections as well as that of its alters (with alters being the other individuals connected to the node). Eigenvector centrality can therefore be interpreted as the social resources available to an individual (Brent et al. 2011).

*Global metrics:* as measures to describe the global structure of the network we calculated *network density*, *gregariousness* and *Typical Group Size (TGS)*. *Network density* calculates the ratio between existing links and all potential links of a network, and it assesses the connection of the network as a whole (Sosa et al. 2021a). *Gregariousness* represents the tendency of individuals to associate with few or many individuals (Godde et al. 2013). At the individual level, it is represented by *strength centrality* and it is calculated as the sum of the values of the association indices involving that individual. The overall gregariousness of a population is calculated as the average gregariousness of all individuals in the population. *TGS* quantifies group size as experienced by an average individual of the population and it emphasises the extent to which members of the population tend to associate (Jarman 1974). It is an animal-centred measure defined as the sum of the squares of the number of individuals in each group, divided by the total number of animals sampled (Jarman 1974).

## **Data analysis**

Association matrices were built in SOCPROG 2.9 (Whitehead 2009). Network analysis was performed in R (R Core Team 2020) using the packages tnet (Opsahl 2015), network and sna (Butts 2020), included in the statnet suite (Statnet Development Team, 2003-2020; Handcock et al. 2008) and with the package ANTs (Sosa et al. 2020a). Generalised Linear Mixed Models (GLMMs) were conducted using the R packages ANTs and lme4 (Bates et al. 2015). Details of which tool was used for each analysis are provided below.

## ***Association patterns***

To investigate association patterns, we used a Quadratic Assignment Procedure (QAP) approach to compare pairs of association networks. The QAP test is a specialised version of the Mantel test that uses random permutations of node labelling to determine whether a correlation between two matrices is significantly higher than expected (Krackhardt 1988; Krause et al. 2015). QAP tests were carried out with 10 000 permutations using the sna package.

To test for consistency in associations between seasons, a QAP test was carried out between the two seasonal association networks within each year. For this analysis, the networks were built excluding individuals that were not observed across both seasons within a year.

Furthermore, to test for consistency in associations between years, we compared the networks built for the summer seasons of the years 2012-2016. The network used for this analysis only included a subset of individuals that were observed in all those five years (hereafter referred to as subset networks). This time period was selected as being optimal in terms of having the largest number of individuals present across the entire period, hence allowing the greatest power for testing for consistency in associations; the summer seasonal network was selected as spring associations may partly be driven by resource availability. Moreover, spring and

summer networks within each year were correlated (see Results section). QAP tests were carried out between each subset network and the subset network of the following year. To test whether the age difference between pairs of individuals had an impact on whether they were likely to associate or to be dominant over each other, we built matrices of difference in age (in years) within each dyad for each year. We built both a symmetrical matrix with absolute age difference as well as an asymmetrical matrix with the exact age difference between dyads. We then used QAP tests to determine whether there was significant consistency in structure between the summer association matrix and the absolute age difference matrix, then between the dominance matrix and the age difference matrix. Finally, to test whether dominance rank differences between individuals predicted their likelihood of association, we built matrices of absolute difference in their Elo scores (used as a proxy for hierarchical rank) and performed a QAP test to test for structural consistency between the summer association matrix and the absolute Elo score difference matrix. As this resulted in multiple hypothesis testing, for each of the sets of QAP tests described before, we applied a sequential Bonferroni correction (Holm 1979) for the assessment of significance levels. A combined  $p$ -value for all years was calculated using Fisher's method with the package poolr (Cinar and Viechtbauer 2020).

### ***Factors affecting node measures and seasonal network structure***

To determine whether association network structure changed between seasons (i.e., between periods with different ecological conditions) and which individual characteristics predicted node-based measures, we carried out Generalized Linear Mixed Models (GLMMs) on permuted association matrices with the package ANTs: time-aggregated networks for each season of each year were built through data stream permutations resulting in a list of 20 symmetrical association matrices (each with 10 000 permutations) used to calculate the

centrality measures of interest (strength and eigenvector centrality) and to run permuted GLMMs.

The fixed and random structures of the permuted GLMMs were selected using non-permuted GLMMs (lme4 package): each GLMM included as the dependent variable either strength centrality (modelled with a gaussian distribution) or eigenvector centrality (modelled with a binomial distribution) and, as fixed effects, the season and individual characteristics: age as a quadratic term (Bergeron et al. 2008) and the season preceding death (as a binary variable that indicated whether the animal died within that year of data collection or if it survived until the following year). The models also included year and individual identity (ID) as random effects. The choice of the fixed effects as well as the assessment of the importance of individual ID as a random effect was made based on the Akaike Information Criterion (AIC, Akaike 1973; Burnham et al. 2011), with  $\Delta AIC > 2$  used as a threshold for the selection of the best fitting models. Graphical analysis of the residuals and the coefficient of determination  $R^2$  were used to check model fit. Both marginal ( $R^2_m$ , that describes the proportion of variance explained by the fixed factors alone) and conditional coefficient of determination ( $R^2_c$ , which describes the proportion of variance explained by both the fixed and random factors) were calculated with the R package MuMIn (Barton 2009).

### *Seasonal and annual changes in the social structure*

To investigate seasonal differences in the social structure, we run linear models to compare the spring and summer values of the global measures (mean gregariousness and TGS, calculated in R with own-built functions). To account for the sampling effort, the number of surveys for each season was added as an explanatory variable to the model.

To detect possible changes in the network structure during the ten years of the study, we calculated the global measures of density (calculated within the network R package),



gregariousness and TGS within each year (across seasons). As we hypothesised that the age structure of the population could affect the cohesion of the social structure and hence the above mentioned global network measures, we calculated the proportion of adult individuals (i.e., of individuals of 9 years and more) and the total number of males in the population (counting the maximum total number of males, including both marked and unmarked individuals, observed during the daily observations). We then ran two separate generalised linear models (GLM) with binomial distribution to test the effect of the proportion of old individuals and of the total number of males on density. In addition, we ran three GLMs to test the effect of the proportion of old individuals and of the total number of males on TGS and to test the effect of the total number of males on gregariousness.

## RESULTS

The association networks of Alpine ibex showed a high level of connectivity (e.g., figure 1) with the network density being close to one in all the years of the study.

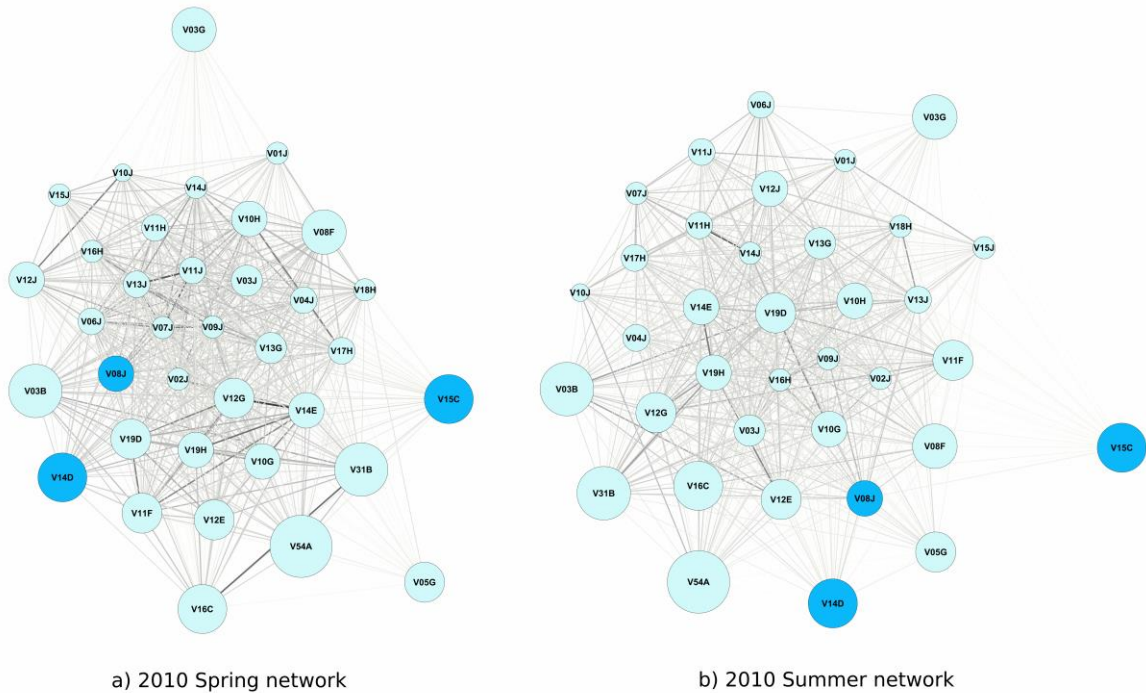

**Figure 1.** An example of a weighted association network of male Alpine ibex in a) spring and b) summer of the same year (2010). Graphs were created using Gephi 0.9.2 (Bastian et al. 2009) with the “ForceAtlas” spatialization tool. The colours and width of the edges are proportional to the strength of association (with darker and thicker edges representing stronger associations). The size of the nodes represents the age of the individuals. The colours of the nodes represent the value of the binary variable “season preceding death” of the individuals during the year. Individuals that die in the months following data collection are represented in darker colour. The graphical visualization of all networks (all season of all years) can be found in Supplementary Materials S1.

### *Association patterns*

QAP tests performed to test for consistent associations across seasons within each year showed significant correlations between association matrices within all the ten years of the study (table 1) indicating that male Alpine ibex maintain consistent bonds throughout the year, despite changes in environment and location. Consistent associations between adjacent years were also observed over a five year period as shown by the results of the pairwise QAP tests performed on the subset networks between summer association networks in adjacent years (table 2).

**Table 1.** Results of QAP tests to investigate consistency in association network structure across the spring and summer seasons within each year. Significant correlations after a Bonferroni sequential correction are indicated by bold *p*-values. Combined *p*-value < 0.001.

| Seasons               | Correlation coefficient | <i>p</i> -value  |
|-----------------------|-------------------------|------------------|
| Spring vs summer 2008 | 0.250                   | <b>0.004</b>     |
| Spring vs summer 2009 | 0.511                   | <b>&lt;0.001</b> |
| Spring vs summer 2010 | 0.526                   | <b>&lt;0.001</b> |
| Spring vs summer 2011 | 0.490                   | <b>&lt;0.001</b> |
| Spring vs summer 2012 | 0.407                   | <b>&lt;0.001</b> |
| Spring vs summer 2013 | 0.315                   | <b>&lt;0.001</b> |
| Spring vs summer 2014 | 0.236                   | <b>0.016</b>     |
| Spring vs summer 2015 | 0.460                   | <b>&lt;0.001</b> |
| Spring vs summer 2016 | 0.452                   | <b>0.007</b>     |
| Spring vs summer 2017 | 0.493                   | <b>&lt;0.001</b> |

**Table 2.** Results of QAP tests to investigate consistency in association network structure between summer seasons of adjacent years. Tests were performed on subset networks including N=21 individuals that were observed in all the years 2012-2016. Significant correlations after a Bonferroni sequential correction are indicated by bold *p*-values. Combined *p*-value < 0.001.

| Years        | Correlation coefficient | <i>p</i> -value |
|--------------|-------------------------|-----------------|
| 2012 vs 2013 | 0.236                   | <b>0.014</b>    |
| 2013 vs 2014 | 0.192                   | <b>0.028</b>    |
| 2014 vs 2015 | 0.265                   | <b>0.016</b>    |
| 2015 vs 2016 | 0.400                   | <b>0.008</b>    |

We also found that dominance matrices mostly correlated positively with age difference matrices within the summer season for each year (table 3a), indicating that dominance interactions were more likely to occur between individuals the greater their difference in age, with the older individual of the dyad being more likely to be dominant over the younger. Association matrices, instead, mostly correlated negatively with their associated absolute age difference matrices, showing that individuals were more likely to associate with those closest in age (table 3b). Finally, the tests between association matrices and absolute difference in Elo score matrices showed no evidence of a correlation between association choice and dominance rank differences or similarities (table 3c).

**Table 3.** Results of QAP tests for correlations between a) dominance matrices and their associated exact age difference matrices (combined  $p$ -value  $<0.001$ ); b) association matrices and their associated and absolute age difference matrices (combined  $p$ -value  $<0.001$ ); c) association matrices and their associated absolute Elo score difference matrices. QAP tests were performed only on the summer season matrices. Significant correlations after a Bonferroni sequential correction are indicated by bold  $P$  values.

|      | a) dominance vs age-diff. |                  | b) association vs abs. age-diff. |                  | c) association vs abs. Elo score-diff. |            |
|------|---------------------------|------------------|----------------------------------|------------------|----------------------------------------|------------|
| Year | Correlation coefficient   | $p$ -value       | Correlation coefficient          | $p$ -value       | Correlation coefficient                | $p$ -value |
| 2008 | 0.078                     | 0.039            | -0.049                           | 0.304            | 0.148                                  | 0.131      |
| 2009 | 0.233                     | 0.033            | -0.239                           | <b>0.009</b>     | 0.106                                  | 0.166      |
| 2010 | 0.063                     | 0.119            | -0.274                           | <b>&lt;0.001</b> | 0.158                                  | 0.038      |
| 2011 | 0.068                     | 0.028            | -0.285                           | <b>&lt;0.001</b> | -0.239                                 | 0.010      |
| 2012 | 0.108                     | <b>0.009</b>     | -0.320                           | <b>&lt;0.001</b> | 0.004                                  | 0.544      |
| 2013 | 0.160                     | <b>&lt;0.001</b> | -0.302                           | <b>&lt;0.001</b> | -0.119                                 | 0.053      |
| 2014 | 0.138                     | <b>0.004</b>     | -0.070                           | 0.230            | 0.043                                  | 0.342      |
| 2015 | 0.247                     | <b>&lt;0.001</b> | -0.261                           | <b>&lt;0.001</b> | -0.036                                 | 0.334      |
| 2016 | 0.188                     | <b>&lt;0.001</b> | -0.158                           | <b>0.007</b>     | -0.103                                 | 0.114      |
| 2017 | 0.108                     | <b>0.007</b>     | -0.295                           | <b>&lt;0.001</b> | 0.059                                  | 0.287      |

# *Factors affecting node measures and seasonal network structure*

The results of the GLMMs, performed to test whether the association network structure changed between seasons and which individual characteristics predicted node-level centrality measures, are presented in tables 4 and 5. Model selection results are presented in the supplementary materials S2.

Strength centrality was significantly lower in the summer season compared to spring and was correlated with age following a quadratic curve, i.e., it increased with age, until around 9-10 years, but then decreased when animals became older (table 4, figure 2). Strength centrality was also negatively correlated with the season preceding death (i.e., the occurrence of death in the months following the observations). In the best fitting model, ID was retained as a random factor (the  $\Delta AIC$  between the selected model with and without ID as random factor was 134.1) and accounted for almost 14% of the variance explained by the model ( $13.88 \pm 3.72$ ). The coefficients of determinations of the selected model were:  $R^2_m=0.30$ ,  $R^2_c=0.72$ .

**Table 4.** Output of the permuted GLMM performed to explain the variance of strength centrality. Perm  $p$ -value represents the permuted  $p$ -values obtained after 10 000 permutations in ANTs. Model specification: strength  $\sim$  age + age<sup>2</sup> + season + season preceding death + (1|year) + (1|ID), family=gaussian.

|                           | Estimate     | Std. Error  | $t$ -value    | Perm $p$ -value  |
|---------------------------|--------------|-------------|---------------|------------------|
| (Intercept)               | 10.69        | 2.42        | 4.41          | <0.001           |
| <b>age</b>                | <b>2.93</b>  | <b>0.41</b> | <b>7.08</b>   | <b>&lt;0.001</b> |
| <b>age<sup>2</sup></b>    | <b>-0.18</b> | <b>0.02</b> | <b>-7.47</b>  | <b>&lt;0.001</b> |
| <b>season</b>             | <b>-9.63</b> | <b>0.36</b> | <b>-26.87</b> | <b>0.022</b>     |
| <b>season prec. death</b> | <b>-2.72</b> | <b>0.65</b> | <b>-4.18</b>  | <b>0.001</b>     |

Consistently with results for strength centrality, eigenvector centrality was significantly lower in the summer season and was correlated with age, increasing until around 8-9 years and then decreasing when animals became older (table 5, figure 2). Eigenvector centrality was also negatively correlated with the occurrence of death in the months following the observations. ID was retained as a random factor in the selected model ( $\Delta AIC$  between the selected model with and without ID as random factor was 13.5). The coefficients of determinations of the selected model were:  $R^2_m=0.12$ ,  $R^2_c=0.55$ .

**Table 5.** Output of the permuted GLMM performed to explain the variance of eigenvector centrality. Perm  $p$ -value represents the permuted  $p$  values obtained after 10 000 permutations in ANTs. Model specification: eigenvector  $\sim$  age + age<sup>2</sup> + season + season preceding death + (1|year) + (1|ID), family= binomial.

|                           | Estimate     | Std. Error  | z-value      | Perm $p$ -value |
|---------------------------|--------------|-------------|--------------|-----------------|
| (Intercept)               | -0.97        | 0.71        | -1.37        | 0.137           |
| <b>age</b>                | <b>0.76</b>  | <b>0.17</b> | <b>4.51</b>  | 0.060           |
| <b>age<sup>2</sup></b>    | <b>-0.05</b> | <b>0.01</b> | <b>-4.89</b> | <b>0.009</b>    |
| <b>season</b>             | <b>-0.54</b> | <b>0.18</b> | <b>-2.93</b> | <b>0.003</b>    |
| <b>season prec. death</b> | <b>-0.83</b> | <b>0.25</b> | <b>-3.29</b> | <b>0.030</b>    |

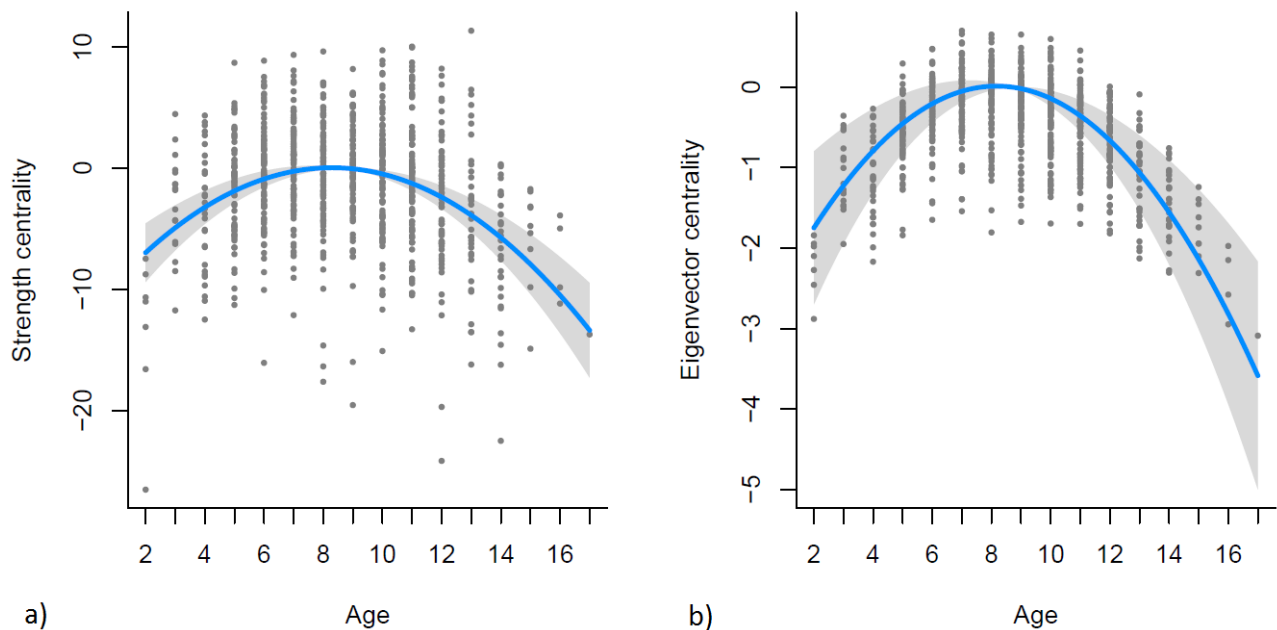

**Figure 2.** Partial regression plots representing the relationship between a) strength and b) eigenvector centrality respectively with age. Plots were built with the package visreg (Breheny and Burchett 2017). The Y axis is scaled around the mean value of the response variable.

### *Seasonal and annual changes in the social structure*

Annual and seasonal measures calculated to describe the global structure of the network are presented in table 6. The density of the network was close to one in all the years of the study with little variation (min.= 0.82, max.=0.99). TGS and gregariousness showed more variation over the years and between spring and summer seasons with both TGS ( $\beta=-6.66$ , Std. Err=2.05,  $p=0.005$ ) and gregariousness ( $\beta=-5.09$ , Std. Err=1.43,  $p=0.002$ ) being significantly lower during summer than during spring seasons (with no effect of sampling effort in either model). Gregariousness also showed differences in the coefficient of variation between years (min=0.18, max=0.40). Neither the proportion of old individuals nor the total number of males

in the population had a significant effect on density or gregariousness. The proportion of old individuals also had no effect on TGS.

**Table 6.** Global measures calculated for the 2008-2017 networks. Density was calculated for the summer networks. Gregariousness (with coefficient of variation, CV, calculated as the ratio of the standard deviation to the mean) and TGS were calculated for both spring and summer networks.

| year | N tot | Proportion ind > 9 y | Density | Gregariousness spring (CV) | Gregariousness mean summer (CV) | TGS spring | TGS summer |
|------|-------|----------------------|---------|----------------------------|---------------------------------|------------|------------|
| 2008 | 59    | 0.32                 | 0.89    | 6.01 (0.20)                | 3.09 (0.40)                     | 12.03      | 8.17       |
| 2009 | 55    | 0.31                 | 0.82    | 5.68 (0.34)                | 2.74 (0.32)                     | 14.72      | 11.65      |
| 2010 | 60    | 0.29                 | 0.95    | 9.36 (0.26)                | 6.85 (0.25)                     | 15.65      | 13.16      |
| 2011 | 57    | 0.26                 | 0.92    | 7.70 (0.28)                | 5.58 (0.36)                     | 11.90      | 10.08      |
| 2012 | 58    | 0.33                 | 0.95    | 12.66 (0.22)               | 7.59 (0.28)                     | 18.67      | 12.93      |
| 2013 | 61    | 0.43                 | 0.89    | 12.26 (0.21)               | 6.55 (0.31)                     | 20.50      | 9.90       |
| 2014 | 58    | 0.45                 | 0.99    | 9.20 (0.20)                | 6.76 (0.23)                     | 17.38      | 13.42      |
| 2015 | 63    | 0.40                 | 0.98    | 16.51 (0.19)               | 6.19 (0.27)                     | 27.07      | 11.27      |
| 2016 | 84    | 0.25                 | 0.96    | 18.07 (0.18)               | 9.20 (0.27)                     | 27.83      | 18.84      |
| 2017 | 84    | 0.19                 | 0.99    | 11.56 (0.26)               | 6.84 (0.29)                     | 22.65      | 16.71      |

## DISCUSSION

We analysed the social network structure of male Alpine ibex using association and behavioural data collected over ten years. Male and female Alpine ibex are strongly segregated all year round, except for during the rutting season that occurs in December-January (Ruckstuhl and Neuhaus 2001). As they do not associate during spring and summer, our study did not consider interactions between males and females and focused on the social network structure of males alone. The network density was very close to one in all the years of the study, highlighting a high level of connection in the network. Dyadic associations were consistent across discrete seasons and also across years, suggesting the existence of small groups with



rather stable composition (comprising individuals of similar ages) that merge and split. Individuals were more likely to associate if they were more similar in age; age difference also correlated with dominance, with older individuals being more likely to be dominant, but there was no consistent relationship between difference in dominance rank and likelihood of association. Mean strength and eigenvector centrality in the association network, gregariousness and Typical Group Size (TGS) were all significantly lower in the summer compared with the spring. Furthermore, strength and eigenvector centrality increased with age until individuals reach maturity and then decreased again during senescence. Some individuals seemed to become more peripheral in the association network in the months prior to their death and, accordingly, strength and eigenvector centrality were lower for those individuals. Finally, our results suggested the presence of individual differences in terms of strength centrality. The association network for male Alpine ibex formed one discrete component, with a high density of connections. Fission-fusion dynamics lead almost every male in the population to associate with each other male at least once by being members of the same sub-group; field observations showed frequent splitting and merging events and that all males occasionally joined together in a single group. For example, during bad weather (i.e., mainly thunderstorms), male ibex tend to group at specific places used as shelters, usually at a lower altitude (A. Brambilla, *pers. obs.*). The Alpine ibex has a relatively small home range (Parrini et al. 2003) and lives in open high-altitude alpine habitat. During summer, males feed in large alpine pasturelands where resources are not concentrated in specific sites making resource attraction unlikely to explain the high network density observed in this species, particularly during summer (see later for a more detailed explanation of the differences in the social structure between spring and summer seasons). The high density of connection observed in male Alpine ibex was therefore probably due to the general gregariousness of the species (Villaret and Bon 1998) that is also observed in other mountain ungulates with a similar social structure and

mating system (e.g., Bighorn sheep). The Alpine ibex is a polygynous species with males actively tending oestrus females and preventing subordinate males from approaching them (Willisch and Neuhaus 2009; Apollonio et al. 2013). As the rutting season of most mountain ungulates occurs in winter, when environmental conditions can be harsh and moving in the snow energetically demanding (Signer et al. 2011), the establishment of the hierarchies often begins earlier. Indeed, agonistic interactions in Alpine ibex occur all year round except immediately after the rutting season (Brivio et al. 2010) and are more frequent during spring and summer months. Being part of a highly connected network may allow males of polygynous species living in highly seasonal environments to interact with many other males reducing the need of agonistic competitions during winter when it is more energetically costly. This advantage may compensate for the costs of group-living that, in the case of gregarious ungulates, are probably mostly related to infection risk (Brambilla et al. 2013; Marchand et al. 2017) as highly connected networks allows for potentially fast spreading of diseases (Wey et al. 2008; Marchand et al. 2017).

We found significant correlations between association matrices for spring and summer seasons within all the ten years of the study and also between adjacent years. The correlation coefficients were rather low, requiring caution in the interpretation of these results. However, the fact that all correlations between spring and summer association matrices of the same year and between summer association matrices of adjacent years were significant, seems to indicate that there are consistent associations within the population, both across seasons and years. In our study, we deemed individuals to be associated if they were members of the same sub-group, assuming the “gambit of the group” (Croft et al. 2008; Franks et al. 2010). If these associations were random, the structure of networks built independently for the spring and summer seasons, in which males spent time in distinct geographical locations (since they carry out seasonal altitudinal migrations, Parrini et al. 2003), would not be expected to correlate. Network

structure across years would also not be expected to correlate if stable associations are not maintained. These stable associations must convey some advantage as they are maintained despite a negligible risk of predation in this population and despite seasonal changes to the global association network structure. Indeed, we found that mean strength and mean eigenvector centrality in the association network, gregariousness and Typical Group Size (TGS) were all significantly lower in the summer compared with the spring. The overall higher values of sociality observed during spring compared to summer can partly be explained by seasonal differences in resource availability (Peignier et al. 2019). During spring, resources are more concentrated as there are only a few pastures available at low altitude, where snow melts earlier. Hence, all male Alpine ibex group together there following the winter. In summer, as snow melts and more pastures become available, male Alpine ibex migrate to a higher altitude (Parrini et al. 2003) and therefore have fewer constraints on where to feed and with whom to associate. Accordingly, overall gregariousness and TGS decrease as well as the mean strength centrality. Similar results have been found in other ungulates, for example in reindeer (*Rangifer tarandus*): Peignier et al. (2019) observed low home range overlap and social associations in summer, when resources were distributed homogeneously, but higher home range overlap and social associations in winter, when resources were distributed heterogeneously. Our results hence strengthen the hypothesis that ecological constraints may influence social behaviour in ungulates. On the other side, in horses, strength centrality was found to be lower outside of the mating season; this highlighted a similar increased freedom in the choice of social partners and feeding locations when constraints were reduced, but in this species, the constraints appeared to be social rather than ecological (Stanley et al. 2018).

Our analyses carried out across a ten year period revealed that the factors leading to assortativity in Alpine ibex appeared constant throughout the study period. Males tended to associate with individuals of a similar age; dominance rank did not seem to predict associations,

but difference in age did predict the likelihood of engaging in dominance interactions. The finding that age predicts association confirmed our expectation and supports the results of previous studies (*Capra ibex*, Villaret and Bon 1995; *Capra pyrenaica*, Alados 1986). However, we were not able to disentangle whether preferential associations were also present within individuals in the same age class and which factors drove these associations (e.g., kinship as observed by Cassinello and Calabuig (2008) in aoudades). A possible explanation of the fact that age predicts association is that individuals with similar characteristics (e.g., age and hence body size) also have similar energetic requirements and this leads them to associate and synchronize their activity so as to maintain group cohesion (Ruckstuhl and Neuhaus 2000; Conradt and Roper 2000). The large differences in body size of male Alpine ibex of different ages further strengthen this explanation and in addition suggests that life history as well can contribute to the evolution of social structures. Furthermore, individuals may associate with others of similar age or size because they share similar social motivations and behaviours that enhance social cohesion and increase association (Cransac et al. 1998; Bon et al. 2001). In a polygynous species with male-male competition that lives in a strongly seasonal environment such as the Alps, adult males may share the need to interact to establish hierarchies before the reproductive season (Brivio et al. 2010; Willis and Neuhaus 2010). At the same time, young males may share the need to interact with other males through sparring to increase fighting skills, as observed for example in African elephants (Chiyo et al. 2011).

In this Alpine ibex population, groups of males of similar age appear to merge and split with other groups regardless of their age. An implication of this could be that there is not a constant transfer of information between old and young males. In this species, the transfer of information between old and young individuals, if present, is likely to be more important for females that have to learn where to find safe and suitable places for parturition and the weaning of calves. In the case of males, since resources are homogeneously distributed during the

summer season and predation risk is negligible, young individuals may avoid the costs of being constantly associated with mature males (with different time activity rhythm and physiological needs) but yet join them on some occasions.

As expected, and not surprisingly, age difference was also positively correlated with an increased likelihood of dominance interactions. Adult individuals were more frequently dominant, as has also been observed in other studies on the same species and on other polygynous mountain ungulates (Pelletier and Festa-Bianchet, 2006; Bergeron et al. 2008; Willisch et al. 2012; Apollonio et al. 2013). The Alpine ibex is a capital breeder with a slow life history strategy and reaches social sexual maturity at around 9-10 years of age (Willisch et al. 2012). Young individuals are therefore often in the lower positions of the hierarchy (Bergeron et al. 2010; Willisch et al. 2012). However, we did not find a correlation between likelihood of association and dominance rank differences, indicating that dominance rank is not a factor that seems to predict social preferences. Only a few of the agonistic interactions among males escalate into physical contact. When an individual's dominance is clear, most of the interactions consists of threat displays. Therefore, associating with individuals of higher rank may not be costly, in terms of a risk of being injured, for low-rank males of species that evolved threat displays as a mean to establish hierarchies.

We also found that age predicted network position; as we were expecting, both strength centrality and eigenvector centrality showed a significant quadratic relationship with age. We found lower centrality values for young and old individuals and maximum centrality values for adult individuals at the peak of fitness (9-10 years old). Young individuals may join groups of adults but then leave and form separate groups, thus explaining the lower centrality values observed in this age class. Moreover, in accordance with the known life history of the species, old and senescent individuals also showed lower strength centrality and eigenvector centrality values. Because of their conservative life history strategy, adult survival is very high in Alpine

ibex (Toïgo et al. 2007). Many males therefore reach senescence with progressively deteriorating body condition (Bergeron et al. 2008; Brambilla et al. 2020) and changes in activity rhythm, meaning they are less likely to remain central in the network. In accordance with this theory, we also found that strength and eigenvector centrality were lower if an animal died within subsequent months. Further evidence for this explanation came from field observations as well as from the structure of the network graphs (fig.1), where it appears that some individuals occupied a more peripheral position in the months preceding their death (fig.1, fig. S1). In particular, this seemed to happen for individuals that died from medium to long term diseases (e.g., pneumonia). In the months preceding death, those individuals were often observed alone, away from the other males. This likely happened because the progressive deterioration of their physical condition did not allow them to follow the daily movements and rhythm of the other individuals. It has been observed that Alpine ibex significantly decrease investment in horn growth in the years preceding death (von Hardenberg et al. 2004) suggesting that energetic investment in non-vital traits is reduced when the animal is in poor physical condition. Our observations suggest that the same is also true for behavioral traits. The observation of changes in individual behavior due to physical conditions and health status may have important implications for understanding the spreading dynamic of infectious diseases (Craft 2015; Silk et al. 2019). However, we were not able to establish the cause of death for all the individuals; a more detailed collection of data on the presence of infectious disease could help shed light on this important issue.

We also found preliminary evidence that inter-individual differences other than age are likely to play a role in determining social network positions in male ibex. Interestingly, an individual's identity concurred to explain their association network position in terms of their strength centrality, suggesting that sociability varies consistently between individuals independent of their age. The presence of behavioural differences that are repeatable over time

and across situations (i.e., personality or temperament) in animals has become widely recognized in the last few decades (Réale et al. 2007) and, since then, it has been observed in several species, including mountain ungulates (e.g., in bighorn sheep, Réale et al. 2000; Réale and Festa-Bianchet 2003; Poissant et al. 2013). Sociability is one of the five temperament traits described in literature (Réale et al. 2007) and our ten-year dataset provided a unique opportunity to follow the associations of several individuals for many years, highlighting the potential impact of personality on network position. However, other measurements of sociability as well as its heritability should be assessed in order to reliably quantify personality in this species (Réale et al. 2007).

Finally, we aimed to verify if the overall structure of the social network remained consistent over a period of ten years and whether possible changes could be explained by demographic characteristics of the population. Due to their experience and knowledge, older individuals are expected to help maintain group cohesion, e.g., leading group movement (McComb et al. 2001). Despite most of the study on this topic being conducted on females in matrilineal societies (McComb et al. 2001; Brent et al. 2015), it has recently been shown that the same may apply also to males (Allen et al. 2020). We therefore expected to find the highest values for global centrality measures in years with a higher number of mature individuals. However, the proportion of males over 9 years of age seemed not to affect any of the global measures considered (TGS, gregariousness, density). Also the total number of individuals in the population did not affect either gregariousness or density. The absence of a relationship between global network measures and the demographic structure of the population could be due to the seasonal movement patterns apparent in this species. Unlike animals such as African elephants, the home range of the Alpine ibex in our study area is rather small (Parrini et al. 2003). The seasonal movement of most male Alpine ibex occurs within the same valley, and they show a high site fidelity, possibly because they live in a rather predictable environment



(Morrison et al. 2021). This likely makes the role of old, experienced individuals less crucial. Similar conditions may apply to other mountain ungulates with low dispersal rate and high site fidelity (Festa-Bianchet 1986). If this hypothesis is confirmed, it could mean that the social cohesion of male mountain ungulates group is stable and is not dependent on the presence of old and experienced individuals, i.e., it shows resilience to changes in group membership. However, we have to acknowledge that, during the years of the study, the demographic structure of the population was not subject to drastic changes as the environmental conditions remained relatively stable and some old males were alive in the population across all the years of the study, even after harsh winters. This could mean that the presence of a few older individuals may be enough to maintain social cohesion; however, it could also signify that we did not capture enough variation to draw biologically meaningful conclusions. As this aspect could have important conservation implications, further data should be collected to determine the effect of demographic structure on the social structure of mountain ungulates.

In conclusion, this study investigated social network dynamics of male of a mountain ungulate over a relatively long time period focusing at the level of group and individual, allowing us to explore ungulate sociality over different scales. As most previous studies on ungulate social networks have focused on female associations, this is one of the few to quantify male social structure in a gregarious ungulate with high levels of sexual segregation. We found that the male Alpine ibex social network is highly cohesive with all individuals being connected; this has important implications for the management of disease outbreaks. Social structure changed during seasons, suggesting that ecological constraints such as resource availability may play a role in shaping association in gregarious ungulates. However, we also demonstrated that male Alpine ibex did not associate randomly but showed stable associations, and that the strength of these associations varies across individuals, with age similarity being a factor driving these associations. This, in turn, suggests that ecological constraints are not enough to explain



gregariousness and preferential associations in ungulates; these are likely to also be driven by physiological and social needs, ultimately varying according to individual characteristics and species life history. Finally, our results highlight the importance of long-term studies based on individually recognizable subjects (Festa-Bianchet et al. 2017).

## **ACKNOWLEDGEMENTS**

We deeply thank Bruno Bassano from the Gran Paradiso National Park biodiversity and scientific research service and the Park Rangers of the surveillance service for captures and marking of Alpine ibex and for providing logistic support during field work. We are grateful to all the students and researchers that helped with data collection in the ten years of the study. We also thank David Laniado and Cristian Pasquaretta for helpful discussion and suggestion on data analysis.

## **CONFLICT OF INTEREST**

The authors declare they have no conflict of interest relating to the content of this article. Cédric Sueur is a recommender for PCI Network Science.

## **DATA AND SCRIPTS AVAILABILITY**

Data and code used to produce this manuscript are deposited on the Dryad Digital Repository with the following DOI: <https://doi.org/10.5061/dryad.w0vt4b8st>

## **SUPPLEMENTARY INFORMATION CAPTION**

Supplementary information S0, S1 and S2 are deposited on bioRxiv

## REFERENCES

- Akaike, H. (1973). Information theory and the maximum likelihood principle in *2nd International Symposium on Information Theory* (B.N. Petrov and F. Csäki, eds.). Akademiai Kiado, Budapest.
- Alados, C. L. (1986). Spatial structure in groups of Spanish ibex (*Capra pyrenaica*). *Biol Behav*, 11, 176-185.
- Albers, P. C., & Vries, H. D. (2001). Elo-rating as a tool in the sequential estimation of dominance strengths. *Animal Behaviour*, 489-495.
- Allen, C. R., Brent, L. J., Motsentwa, T., Weiss, M. N., & Croft, D. P. (2020). Importance of old bulls: leaders and followers in collective movements of all-male groups in African savannah elephants (*Loxodonta africana*). *Scientific reports*, 10(1), 1-9.
- Altmann, J. (1974). Observational study of behavior: sampling methods. *Behaviour*, 49(3-4), 227-266.
- Apollonio, M., Brivio, F., Rossi, I., Bassano, B., & Grignolio, S. (2013). Consequences of snowy winters on male mating strategies and reproduction in a mountain ungulate. *Behavioural processes*, 98, 44-50.
- Appleby M. C. (1983). Competition in a red deer stag social group: rank, age and relatedness of opponents. *Animal Behaviour*, 31, 913-918.
- Aureli F. et al. 2008. Fission-fusion dynamics: new research frameworks. *Current Anthropology*, 49: 627-654.
- Bassano, B., von Hardenberg, A., Pelletier, F., & Gobbi, G. (2003). A method to weigh free-ranging ungulates without handling. *Wildlife Society Bulletin*, 1205-1209.
- Barton, K. (2009) Mu-MIn: Multi-model inference. R Package Version 1.43.17 <https://CRAN.R-project.org/package=MUMIn>
- Bates D, Mächler M, Bolker B & Walker S (2015). Fitting Linear Mixed-Effects Models Using lme4. *Journal of Statistical Software*, 67(1), 1-48.
- Bergeron, P., Grignolio, S., Apollonio, M., Shipley, B., & Festa-Bianchet, M. (2010). Secondary sexual characters signal fighting ability and determine social rank in Alpine ibex (*Capra ibex*). *Behavioral Ecology and Sociobiology*, 64(8), 1299-1307.
- Bond, M. L., Lee, D. E., Ozgul, A., & König, B. (2019). Fission-fusion dynamics of a megaherbivore are driven by ecological, anthropogenic, temporal, and social factors. *Oecologia*, 191(2), 335-347.
- Borgeaud, C., Sosa, S., Sueur, C., & Bshary, R. (2017). The influence of demographic variation on social network stability in wild vervet monkeys. *Animal Behaviour*, 134, 155-165.

- 780 Brambilla, A., von Hardenberg, A., Kristo, O., Bassano, B., & Bogliani, G. (2013). Don't spit  
781 in the soup: faecal avoidance in foraging wild Alpine ibex, *Capra ibex*. *Animal Behaviour*,  
782 86(1), 153-158.
- 783
- 784 Brambilla, A., & Brivio, F. (2018). Assessing the effects of helicopter disturbance in a  
785 mountain ungulate on different time scales. *Mammalian Biology*, 90(1), 30-37.
- 786
- 787 Brambilla, A., & Canedoli, C. (2014). How to continue measuring horn growth after capture  
788 in Alpine ibex. *Journal of Mountain Ecology*, 9.
- 789
- 790 Brambilla, A., Biebach, I., Bassano, B., Bogliani, G., & von Hardenberg, A. (2015). Direct and  
791 indirect causal effects of heterozygosity on fitness-related traits in Alpine ibex. *Proceedings of*  
792 *the Royal Society B: Biological Sciences*, 282(1798), 20141873.
- 793
- 794 Brambilla, A., Keller, L., Bassano, B., & Grossen, C. (2018). Heterozygosity–fitness  
795 correlation at the major histocompatibility complex despite low variation in Alpine ibex (*Capra*  
796 *ibex*). *Evolutionary applications*, 11(5), 631-644.
- 797
- 798 Brambilla, A., Von Hardenberg, A., Nelli, L., & Bassano, B. (2020). Distribution, status, and  
799 recent population dynamics of Alpine ibex *Capra ibex* in Europe. *Mammal Review*, 50(3),  
800 267-277.
- 801
- 802 Breheny, P and Burchett, W (2017). Visualization of Regression Models Using visreg. *The R*  
803 *Journal*, 9: 56-71.
- 804
- 805 Brent, L. J., Lehmann, J., & Ramos-Fernández, G. (2011). Social network analysis in the study  
806 of nonhuman primates: A historical perspective. *American Journal of Primatology*, 73(8), 720-  
807 730.
- 808
- 809 Brent, L. J., Franks, D. W., Foster, E. A., Balcomb, K. C., Cant, M. A., & Croft, D. P. (2015).  
810 Ecological knowledge, leadership, and the evolution of menopause in killer whales. *Current*  
811 *Biology*, 25(6), 746-750.
- 812
- 813 Brivio, F., Grignolio, S., & Apollonio, M. (2010). To feed or not to feed? Testing different  
814 hypotheses on rut-induced hypophagia in a mountain ungulate. *Ethology*, 116(5), 406-415.
- 815
- 816 Brivio, F., Grignolio, S., Sica, N., Cerise, S., & Bassano, B. (2015). Assessing the impact of  
817 capture on wild animals: the case study of chemical immobilisation on alpine ibex. *PLoS One*,  
818 10(6), e0130957.
- 819
- 820 Burnham, K. P., Anderson, D. R., & Huyvaert, K. P. (2011). AIC model selection and  
821 multimodel inference in behavioral ecology: some background, observations, and comparisons.  
822 *Behavioral ecology and sociobiology*, 65(1), 23-35.
- 823
- 824 Butts, C., T. (2020). sna: Tools for Social Network Analysis. R package version 2.6.
- 825
- 826 Cameron, E. Z., Setsaas, T. H., & Linklater, W. L. (2009). Social bonds between unrelated  
827 females increase reproductive success in feral horses. *Proceedings of the National Academy of*  
828 *Sciences*, 106(33), 13850-13853.
- 829

- Cantor, M., Wedekin, L. L., Guimaraes, P. R., Daura-Jorge, F. G., Rossi-Santos, M. R., & Simoes-Lopes, P. C. (2012). Disentangling social networks from spatiotemporal dynamics: the temporal structure of a dolphin society. *Animal Behaviour*, 84(3), 641-651.
- Carter, K. D., Brand, R., Carter, J. K., Shorrocks, B., & Goldizen, A. W. (2013). Social networks, long-term associations and age-related sociability of wild giraffes. *Animal Behaviour*, 86(5), 901-910.
- Cassinello, J. and Calabuig, G. (2008). Spatial Association in a Highly Inbred Ungulate Population: Evidence of Fine-Scale Kin Recognition. *Ethology*, 114: 124–132.
- Chiyo, P. I., Archie, E. A., Hollister-Smith, J. A., Lee, P. C., Poole, J. H., Moss, C. J., & Alberts, S. C. (2011). Association patterns of African elephants in all-male groups: the role of age and genetic relatedness. *Animal Behaviour*, 81(6), 1093-1099.
- Cinar, O., & Viechtbauer, W. (2020). Poolr: methods for pooling P-values from (dependent) tests. *R Package Version*, 9-8.
- Clutton-Brock, T. (2021). Social evolution in mammals. *Science*, 373(6561), eabc9699.
- Connor, R. C., & Wells, R. S. (2000). The bottlenose dolphin: social relationships in a fission–fusion society. In ‘Cetacean Societies: Field Studies of Dolphins and Whales’.(Eds J. Mann, RC Connor, PL Tyack and H. Whitehead.) pp. 91–126.
- Conradt, L., & Roper, T. J. (2000). Activity synchrony and social cohesion: a fission-fusion model. *Proceedings of the Royal Society of London. Series B: Biological Sciences*, 267(1458), 2213-2218.
- Couturier M.A.J. (1962) Le Bouquetin des Alps: Capra aegagrus ibex ibex. L. Arthaud, Grenoble France
- Couzin, I. D., & Laidre, M. E. (2009). Fission–fusion populations. *Current biology*, 19(15), R633-R635.
- Cransac, N., Gerard, J. F., Maublanc, M. L., & Pépin, D. (1998). An example of segregation between age and sex classes only weakly related to habitat use in mouflon sheep (*Ovis gmelini*). *Journal of Zoology*, 244(3), 371-378.
- Craft, M. E. (2015). Infectious disease transmission and contact networks in wildlife and livestock. *Philosophical Transactions of the Royal Society B: Biological Sciences*, 370(1669), 20140107.
- Croft D. P., James R., Krause J. (2008). Exploring Animal Social Networks. Princeton University Press.
- Elo A. E. (1978). The Rating of Chess Players, Past and Present. New York: Arco.
- Festa-Bianchet, M. (1986). Site fidelity and seasonal range use by bighorn rams. *Canadian Journal of Zoology*, 64(10), 2126-2132.

- 880 Festa-Bianchet, M., Douhard, M., Gaillard, J. M., & Pelletier, F. (2017). Successes and  
881 challenges of long-term field studies of marked ungulates. *Journal of Mammalogy*, 98(3), 612-  
882 620.
- 883
- 884 Firth, J. A., Cole, E. F., Ioannou, C. C., Quinn, J. L., Aplin, L. M., Culina, A., ... & Sheldon,  
885 B. C. (2018). Personality shapes pair bonding in a wild bird social system. *Nature ecology &*  
886 *evolution*, 2(11), 1696-1699.
- 887
- 888 Fischhoff, I. R., Dushoff, J., Sundaresan, S. R., Cordingley, J. E., & Rubenstein, D. I. (2009).  
889 Reproductive status influences group size and persistence of bonds in male plains zebra (*Equus*  
890 *burchelli*). *Behavioral Ecology and Sociobiology*, 63(7), 1035-1043.
- 891
- 892 Flack, J. C., Girvan, M., De Waal, F. B., & Krakauer, D. C. (2006). Policing stabilizes  
893 construction of social niches in primates. *Nature*, 439(7075), 426-429.
- 894
- 895 Fogarty S., Cote J., Sih A. 2011. Social personality polymorphism and the spread of invasive  
896 species: a model. *The American Naturalist*, 177(3), 273-287.
- 897
- 898 Franks, D. W., Ruxton, G. D., & James, R. (2010). Sampling animal association networks with  
899 the gambit of the group. *Behavioral ecology and sociobiology*, 64(3), 493-503.
- 900
- 901 Godde, S., Humbert, L., Côté, S. D., Réale, D., & Whitehead, H. (2013). Correcting for the  
902 impact of gregariousness in social network analyses. *Animal Behaviour*, 85(3), 553-558.
- 903
- 904 Grueter, C. C., Qi, X., Zinner, D., Bergman, T., Li, M., Xiang, Z., ... & Swedell, L. (2020).  
905 Multilevel organisation of animal sociality. *Trends in ecology & evolution*. 35(9), 834-847.
- 906
- 907 Handcock, M. S., Hunter, D. R., Butts, C. T., Goodreau, S. M., & Morris, M. (2008). statnet:  
908 Software tools for the representation, visualization, analysis and simulation of network data.  
909 *Journal of Statistical Software*, 24(1), 1548.
- 910
- 911 Holekamp, K. E., Cooper, S. M., Katona, C. I., Berry, N. A., Frank, L. G., & Smale, L. (1997).  
912 Patterns of association among female spotted hyenas (*Crocuta crocuta*). *Journal of*  
913 *Mammalogy*, 78(1), 55-64.
- 914
- 915 Holm, S. (1979). A simple sequentially rejective multiple test procedure. *Scandinavian journal*  
916 *of statistics*, 65-70.
- 917
- 918 Ilany, A., & Akcay, E. (2016). Social inheritance can explain the structure of animal social  
919 networks. *Nature communications*, 7(1), 1-10.
- 920
- 921 Jarman, P. (1974). The social organisation of antelope in relation to their ecology. *Behaviour*,  
922 48(1-4), 215-267.
- 923
- 924 Jewell P. A., Milner C., Boyd J. M. (1974). Island survivors. The ecology of the Soay sheep of  
925 St. Kilda. The Athlone Press, University of London, London
- 926
- 927 Kimura, R. (1998). Mutual grooming and preferred associate relationships in a band of free-  
928 ranging horses. *Applied Animal Behaviour Science*, 59(4), 265-276.
- 929

- 930 Kerth, G., & König, B. (1999). Fission, fusion and nonrandom associations in female  
931 Bechstein's bats (*Myotis bechsteinii*). *Behaviour*, 136(9), 1187-1202.
- 932
- 933 Krackhardt, D. (1988). Predicting with networks: Nonparametric multiple regression analysis  
934 of dyadic data. *Social networks*, 10(4), 359-381.
- 935
- 936 Krause, J., Ruxton, G. D., Ruxton, G., & Ruxton, I. G. (2002). *Living in groups*. Oxford  
937 University Press.
- 938
- 939 Krause, J., Lusseau, D., & James, R. (2009). Animal social networks: an introduction.  
940 *Behavioral Ecology and Sociobiology*, 63(7), 967-973.
- 941
- 942 Krause, J., James, R., & Croft, D. P. (2010). Personality in the context of social networks.  
943 *Philosophical Transactions of the Royal Society B: Biological Sciences*, 365(1560), 4099-  
944 4106.
- 945
- 946 Krause, J., James, R., Franks, D. W., & Croft, D. P. (Eds.). (2015). *Animal social networks*.  
947 Oxford University Press, USA.
- 948
- 949 Le Pendu, Y., Briedermann, L., Gerard, J. F., & Maublanc, M. L. (1995). Inter-individual  
950 associations and social structure of a mouflon population (*Ovis orientalis musimon*).  
951 *Behavioural processes*, 34(1), 67-80.
- 952
- 953 Machanda, Z. P., & Rosati, A. G. (2020). Shifting sociality during primate ageing.  
954 *Philosophical Transactions of the Royal Society B*, 375(1811), 20190620.
- 955
- 956 MacIntosh, A. J., Jacobs, A., Garcia, C., Shimizu, K., Mouri, K., Huffman, M. A., &  
957 Hernandez, A. D. (2012). Monkeys in the middle: parasite transmission through the social  
958 network of a wild primate. *PloS one*, 7(12), e51144.
- 959
- 960 Marchand, P., Freycon, P., Herbaux, J. P., Game, Y., Toïgo, C., Gilot-Fromont, E., ... & Hars,  
961 J. (2017). Sociospatial structure explains marked variation in brucellosis seroprevalence in an  
962 Alpine ibex population. *Scientific reports*, 7(1), 1-12.
- 963
- 964 McComb, K., Moss, C., Durant, S. M., Baker, L., & Sayialel, S. (2001). Matriarchs as  
965 repositories of social knowledge in African elephants. *Science*, 292(5516), 491-494.
- 966
- 967 Morrison, T. A., Merkle, J. A., Hopcraft, J. G. C., Aikens, E. O., Beck, J. L., Boone, R. B., ...  
968 & Kauffman, M. J. (2021). Drivers of site fidelity in ungulates. *Journal of animal ecology*,  
969 90(4), 955-966.
- 970
- 971 Moscovice, L. R., Sueur, C., & Aureli, F. (2020). How socio-ecological factors influence the  
972 differentiation of social relationships: an integrated conceptual framework. *Biology Letters*,  
973 16(9), 20200384.
- 974
- 975 Neumann, C., Duboscq, J., Dubuc, C., Ginting, A., Irwan, A. M., Agil, M., ... & Engelhardt,  
976 A. (2011). Assessing dominance hierarchies: validation and advantages of progressive  
977 evaluation with Elo-rating. *Animal Behaviour*, 82(4), 911-921.
- 978
- 979 Opsahl, T., & Opsahl, M. T. (2015). Package 'tnet'.



- Papageorgiou, D., & Farine, D. R. (2020). Multilevel societies in birds. *Trends in Ecology & Evolution*, 36.
- Parrini, F., Grignolio, S., Luccarini, S., Bassano, B., & Apollonio, M. (2003). Spatial behaviour of adult male Alpine ibex *Capra ibex ibex* in the Gran Paradiso National Park, Italy. *Acta Theriologica*, 48(3), 411-423.
- Peignier, M., Webber, Q. M., Koen, E. L., Laforge, M. P., Robitaille, A. L., & Vander Wal, E. (2019). Space use and social association in a gregarious ungulate: Testing the conspecific attraction and resource dispersion hypotheses. *Ecology and evolution*, 9(9), 5133-5145.
- Pelletier, F., & Festa-Bianchet, M. (2006). Sexual selection and social rank in bighorn rams. *Animal Behaviour*, 71(3), 649-655.
- Pinter-Wollman, N., Hobson, E. A., Smith, J. E., Edelman, A. J., Shizuka, D., De Silva, S., ... & Fewell, J. (2014). The dynamics of animal social networks: analytical, conceptual, and theoretical advances. *Behavioral Ecology*, 25(2), 242-255.
- Poissant, J., Réale, D., Martin, J. G. A., Festa-Bianchet, M., & Coltman, D. W. (2013). A quantitative trait locus analysis of personality in wild bighorn sheep. *Ecology and evolution*, 3(3), 474-481.
- Podgórski, T., Lusseau, D., Scandura, M., Sönnichsen, L., & Jędrzejewska, B. (2014). Long-lasting, kin-directed female interactions in a spatially structured wild boar social network. *PLoS One*, 9(6), e99875.
- R Core Team (2020). R: A language and environment for statistical computing. Vienna, Austria: R Computing Foundation for Science. Retrieved from <http://www.R-project.org>
- Ramos, A., Manizan, L., Rodriguez, E., Kemp, Y. J., & Sueur, C. (2019). The social network structure of a semi-free roaming European bison herd (*Bison bonasus*). *Behavioural processes*, 158, 97-105.
- Réale, D., Dingemanse, N. J., Kazem, A. J., & Wright, J. (2010). Evolutionary and ecological approaches to the study of personality. *Philosophical Transactions of the Royal Society B: Biological Sciences*, 365(1560), 3937-3946.
- Réale, D., & Festa-Bianchet, M. (2003). Predator-induced natural selection on temperament in bighorn ewes. *Animal behaviour*, 65(3), 463-470.
- Réale, D., Gallant, B. Y., Leblanc, M., & Festa-Bianchet, M. (2000). Consistency of temperament in bighorn ewes and correlates with behaviour and life history. *Animal behaviour*, 60(5), 589-597.
- Réale, D., Reader, S. M., Sol, D., McDougall, P. T., & Dingemanse, N. J. (2007). Integrating animal temperament within ecology and evolution. *Biological reviews*, 82(2), 291-318.
- Ruckstuhl, K., & Neuhaus, P. (2001). Behavioral synchrony in ibex groups: effects of age, sex and habitat. *Behaviour*, 138(8), 1033-1046.

- 1030
- 1031 Ruckstuhl, K., & Neuhaus, P. (2000). Sexual segregation in ungulates: a new approach.
- 1032 *Behaviour*, 137(3), 361-377.
- 1033
- 1034 Schakner, Z. A., Petelle, M. B., Tennis, M. J., Van der Leeuw, B. K., Stansell, R. T., &
- 1035 Blumstein, D. T. (2017). Social associations between California sea lions influence the use of
- 1036 a novel foraging ground. *Royal Society open science*, 4(5), 160820.
- 1037
- 1038 Shizuka, D., & Johnson, A. E. (2020). How demographic processes shape animal social
- 1039 networks. *Behavioral Ecology*, 31(1), 1-11.
- 1040
- 1041 Signer, C., Ruf, T., & Arnold, W. (2011). Hypometabolism and basking: the strategies of
- 1042 Alpine ibex to endure harsh over-wintering conditions. *Functional Ecology*, 25(3), 537-547.
- 1043
- 1044 Silk, M. J., Croft, D. P., Tregenza, T., & Bearhop, S. (2014). The importance of fission–fusion
- 1045 social group dynamics in birds. *Ibis*, 156(4), 701-715.
- 1046
- 1047 Silk, M. J., Hodgson, D. J., Rozins, C., Croft, D. P., Delahay, R. J., Boots, M., & McDonald,
- 1048 R. A. (2019). Integrating social behaviour, demography and disease dynamics in network
- 1049 models: applications to disease management in declining wildlife populations. *Philosophical*
- 1050 *Transactions of the Royal Society B*, 374(1781), 20180211.
- 1051
- 1052 Smith, J. E., Powning, K. S., Dawes, S. E., Estrada, J. R., Hopper, A. L., Piotrowski, S. L., &
- 1053 Holekamp, K. E. (2011). Greetings promote cooperation and reinforce social bonds among
- 1054 spotted hyaenas. *Animal Behaviour*, 81(2), 401-415.
- 1055
- 1056 Smuts B. B., Cheney D. L., Seyfarth R. M., Wrangham R. W., Struhsaker T. T. (1987). Primate
- 1057 societies. Chicago: The University of Chicago Press.
- 1058
- 1059 Snijders, L., Blumstein, D. T., Stanley, C. R., & Franks, D. W. (2017). Animal social network
- 1060 theory can help wildlife conservation. *Trends in ecology & evolution*, 32(8), 567-577.
- 1061
- 1062 Sosa, S. (2016). The influence of gender, age, matriline and hierarchical rank on individual
- 1063 social position, role and interactional patterns in *Macaca sylvanus* at ‘La Forêt des singes’: A
- 1064 multilevel social network approach. *Frontiers in psychology*, 7, 529.
- 1065
- 1066 Sosa, S., Puga-Gonzalez, I., Hu, F., Pansanel, J., Xie, X., & Sueur, C. (2020a). A multilevel
- 1067 statistical toolkit to study animal social networks: the Animal network toolkit Software (Ants)
- 1068 R package. *Scientific reports*, 10(1), 1-8.
- 1069
- 1070 Sosa, S., Sueur, C., & Puga-Gonzalez, I. (2021a). Network measures in animal social network
- 1071 analysis: Their strengths, limits, interpretations and uses. *Methods in Ecology and Evolution*,
- 1072 12(1), 10-21.
- 1073
- 1074 Sosa, S., Jacoby, D. M., Lihoreau, M., & Sueur, C. (2021b). Animal social networks: Towards
- 1075 an integrative framework embedding social interactions, space and time. *Methods in Ecology*
- 1076 *and Evolution*, 12,4-9.
- 1077



- Stanley, C. R., & Dunbar, R. I. M. (2013). Consistent social structure and optimal clique size revealed by social network analysis of feral goats, *Capra hircus*. *Animal Behaviour*, 85(4), 771-779.
- Stanley, C. R., Mettke-Hofmann, C., Hager, R., & Shultz, S. (2018). Social stability in semiferal ponies: networks show interannual stability alongside seasonal flexibility. *Animal Behaviour*, 136, 175-184.
- Statnet Development Team (2003-2020). Statnet: Software tools for the Statistical Modeling of Network Data. <http://statnet.org>.
- Sueur, C., King, A. J., Conradt, L., Kerth, G., Lusseau, D., Mettke-Hofmann, C., ... & Aureli, F. (2011). Collective decision-making and fission–fusion dynamics: a conceptual framework. *Oikos*, 120(11), 1608-1617.
- Tarlow, E. M., & Blumstein, D. T. (2007). Evaluating methods to quantify anthropogenic stressors on wild animals. *Applied Animal Behaviour Science*, 102(3-4), 429-451.
- Teitelbaum, C. S., Converse, S. J., & Mueller, T. (2017). Birds choose long-term partners years before breeding. *Animal Behaviour*, 134, 147-154.
- Toïgo, C., Gaillard, J. M., Festa-Bianchet, M., Largo, E., Michallet, J., & Maillard, D. (2007). Sex-and age-specific survival of the highly dimorphic Alpine ibex: evidence for a conservative life-history tactic. *Journal of Animal Ecology*, 76(4), 679-686.
- Turner, J. W., Bills, P. S., & Holekamp, K. E. (2018). Ontogenetic change in determinants of social network position in the spotted hyena. *Behavioral ecology and sociobiology*, 72(1), 10.
- van de Waal, E., & Bshary, R. (2011). Social-learning abilities of wild vervet monkeys in a two-step task artificial fruit experiment. *Animal Behaviour*, 81(2), 433-438.
- Vander Wal, E., Festa-Bianchet, M., Réale, D., Coltman, D. W., & Pelletier, F. (2015). Sex-based differences in the adaptive value of social behavior contrasted against morphology and environment. *Ecology*, 96(3), 631-641.
- Vander Wal, E., Gagné-Delorme, A., Festa-Bianchet, M., & Pelletier, F. (2016). Dyadic associations and individual sociality in bighorn ewes. *Behavioral Ecology*, 27(2), 560-566.
- von Hardenberg, A., Bassano, B., Arranz, M. D. P. Z., & Bogliani, G. (2004). Horn growth but not asymmetry heralds the onset of senescence in male Alpine ibex (*Capra ibex*). *Journal of Zoology*, 263(4), 425-432.
- Wasserman, S., & Faust, K. (1994). *Social network analysis: Methods and applications* (Vol. 8). Cambridge university press.
- Welch, M. J., Smith, T., Hosie, C., Wormell, D., Price, E., & Stanley, C. R. (2020). Social Experience of Captive Livingstone’s Fruit Bats (*Pteropus livingstonii*). *Animals*, 10(8), 1321.
- Wey, T., Blumstein, D. T., Shen, W., & Jordán, F. (2008). Social network analysis of animal behaviour: a promising tool for the study of sociality. *Animal behaviour*, 75(2), 333-344.

- Wey, T. W., & Blumstein, D. T. (2010). Social cohesion in yellow-bellied marmots is established through age and kin structuring. *Animal Behaviour*, 79(6), 1343-1352.
- Wilson, A. D., Krause, S., James, R., Croft, D. P., Ramnarine, I. W., Borner, K. K., ... & Krause, J. (2014). Dynamic social networks in guppies (*Poecilia reticulata*). *Behavioral Ecology and Sociobiology*, 68(6), 915-925.
- Wilson, D. E., & Mittermeier, R. A. (2011). Handbook of the mammals of the world. Vol. 2: Hoofed mammals. Lynx Editions.
- Villaret, J. C., & Bon, R. (1995). Social and spatial segregation in Alpine ibex (*Capra ibex*) in Bargy, French Alps. *Ethology*, 101(4), 291-300.
- Villaret J. C., Bon, R. (1998). Sociality and relationships in Alpine ibex (*Capra ibex*). *Revue d'écologie*.
- Whitehead, H. (2008). Analysing animal societies: Quantitative Methods for Vertebrate Social Analysis. Chicago: University of Chicago Press.
- Whitehead, H. (2009). SOCPROG programs: analysing animal social structures. *Behavioral Ecology and Sociobiology*, 63(5), 765-778.
- Williams, R., & Lusseau, D. (2006). A killer whale social network is vulnerable to targeted removals. *Biology letters*, 2(4), 497-500.
- Willisch, C. S., & Neuhaus, P. (2009). Alternative mating tactics and their impact on survival in adult male Alpine ibex (*Capra ibex ibex*). *Journal of Mammalogy*, 90(6), 1421-1430.
- Willisch, C. S., & Neuhaus, P. (2010). Social dominance and conflict reduction in rutting male Alpine ibex, *Capra ibex*. *Behavioral Ecology*, 21(2), 372-380.
- Willisch, C. S., Biebach, I., Koller, U., Bucher, T., Marreros, N., Ryser-Degiorgis, M. P., ... & Neuhaus, P. (2012). Male reproductive pattern in a polygynous ungulate with a slow life-history: the role of age, social status and alternative mating tactics. *Evolutionary Ecology*, 26(1), 187-206.
- Wittemyer, G., Okello, J. B., Rasmussen, H. B., Arctander, P., Nyakaana, S., Douglas-Hamilton, I., & Siegismund, H. R. (2009). Where sociality and relatedness diverge: the genetic basis for hierarchical social organization in African elephants. *Proceedings of the Royal Society B: Biological Sciences*, 276(1672), 3513-3521.
