# Supplementary material for: Long term analysis of social structure: evidence of age-based consistent associations in male Alpine ibex
Source: bioRxiv or medRxiv preprint supplement (doi:10.1101/2021.12.02.470954), 2022-05-03

## **Long term analysis of social structure: evidence of age-based consistent social preferences in Alpine ibex**

### **SUPPLEMENTARY MATERIAL S1**

The following pages contain the graphical representation of the weighted association networks of male Alpine ibex in spring and summer season of each year of the study (2008-2018).

Graphs were created using Gephi 0.9.2 (Bastian et al., 2009) with the “ForceAtlas” spatialization tool. The colours and width of the edges are proportional to the strength of association (with darker and thicker edges representing stronger associations). The size of the nodes represents the age of the individuals (due to space constrain on the page, the size of the nodes of animals of a given age is not constant in the graphs of different seasons/year). The colours of the nodes represent the value of the binary variable “season preceding death” of the individuals during the year. Individuals that die in the months following data collection are represented in darker colour.

# Alpine ibex network spring 2008

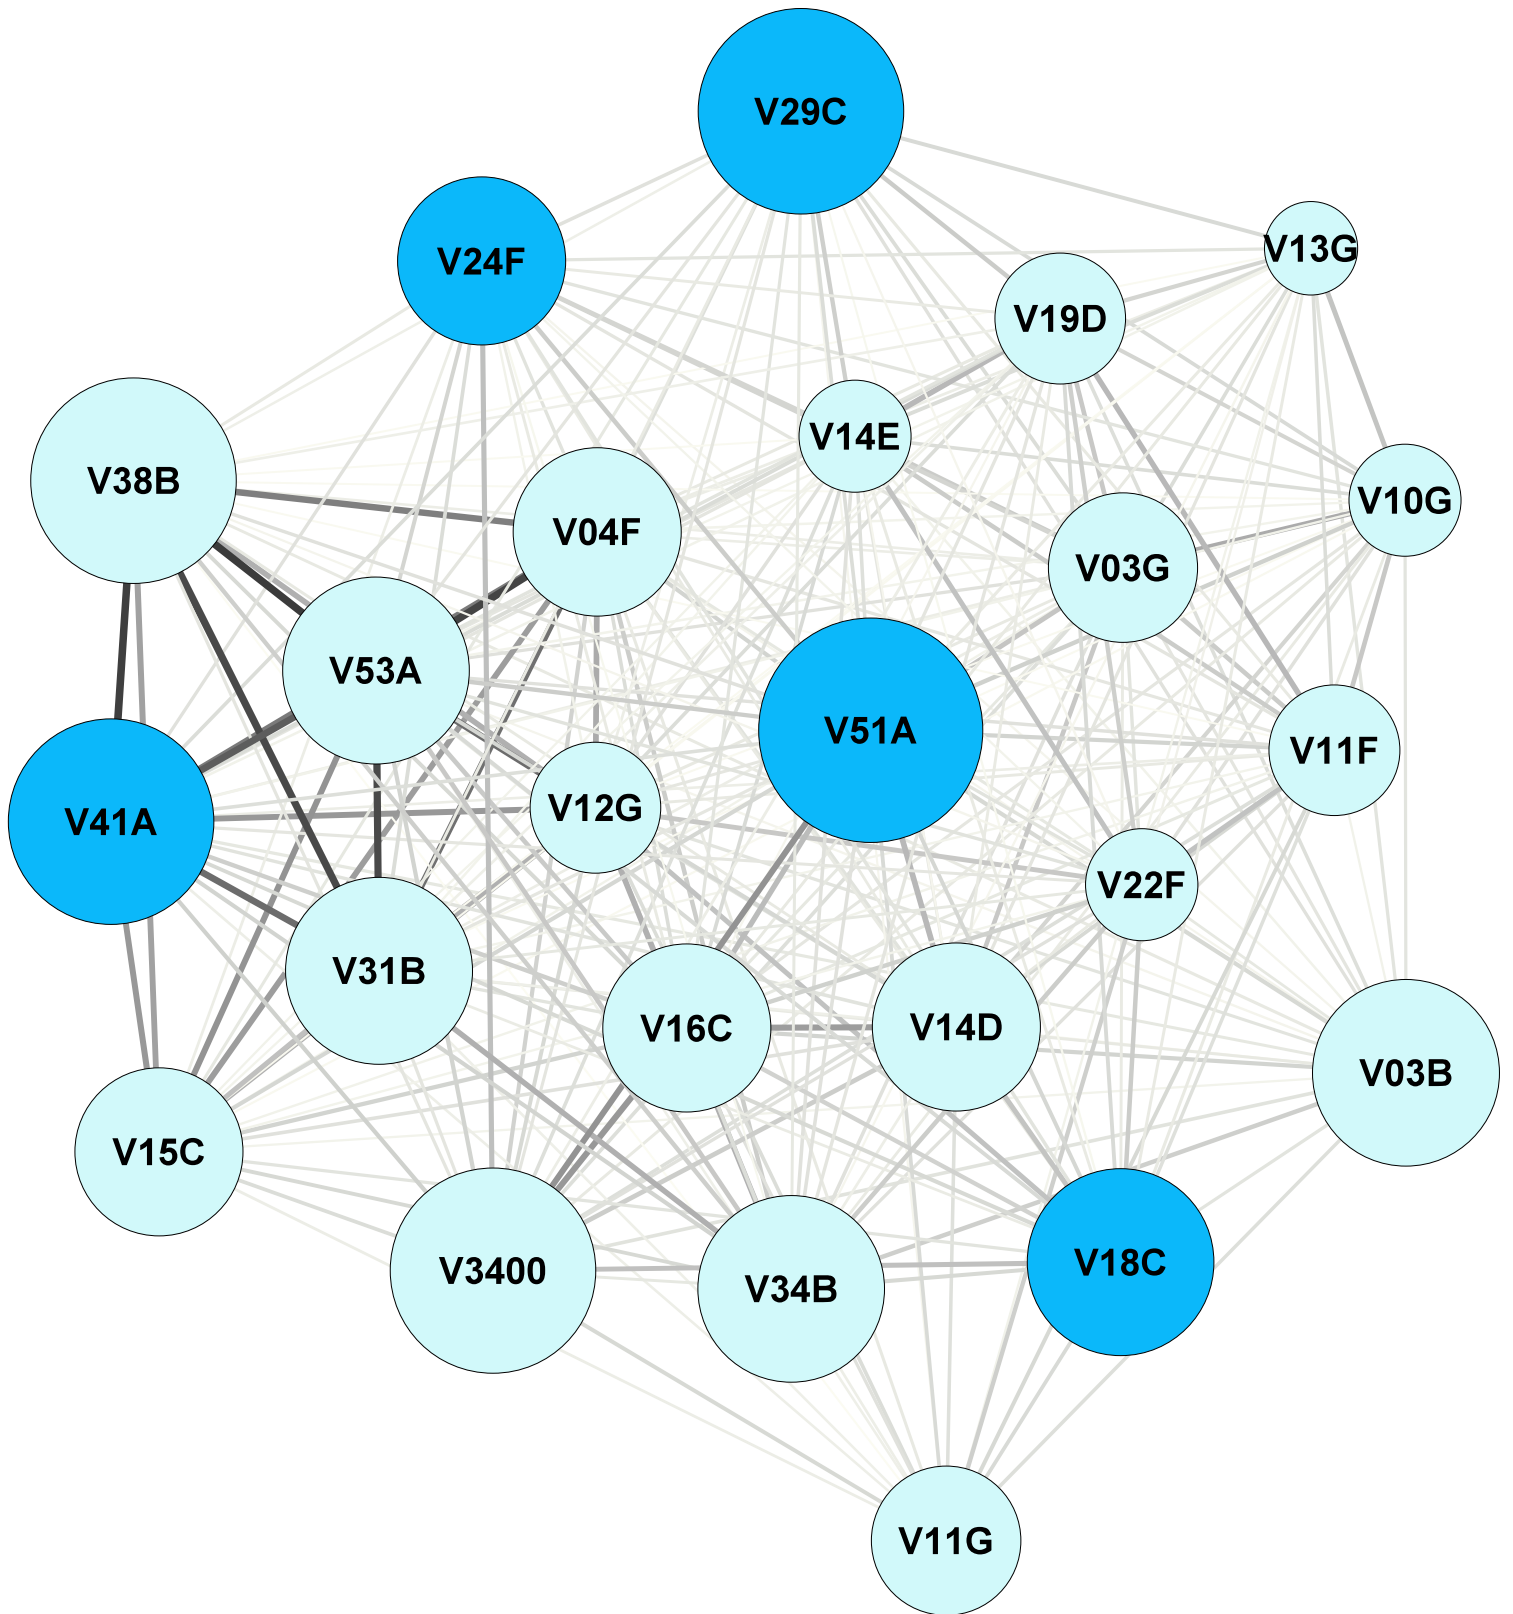

# Alpine ibex network summer 2008

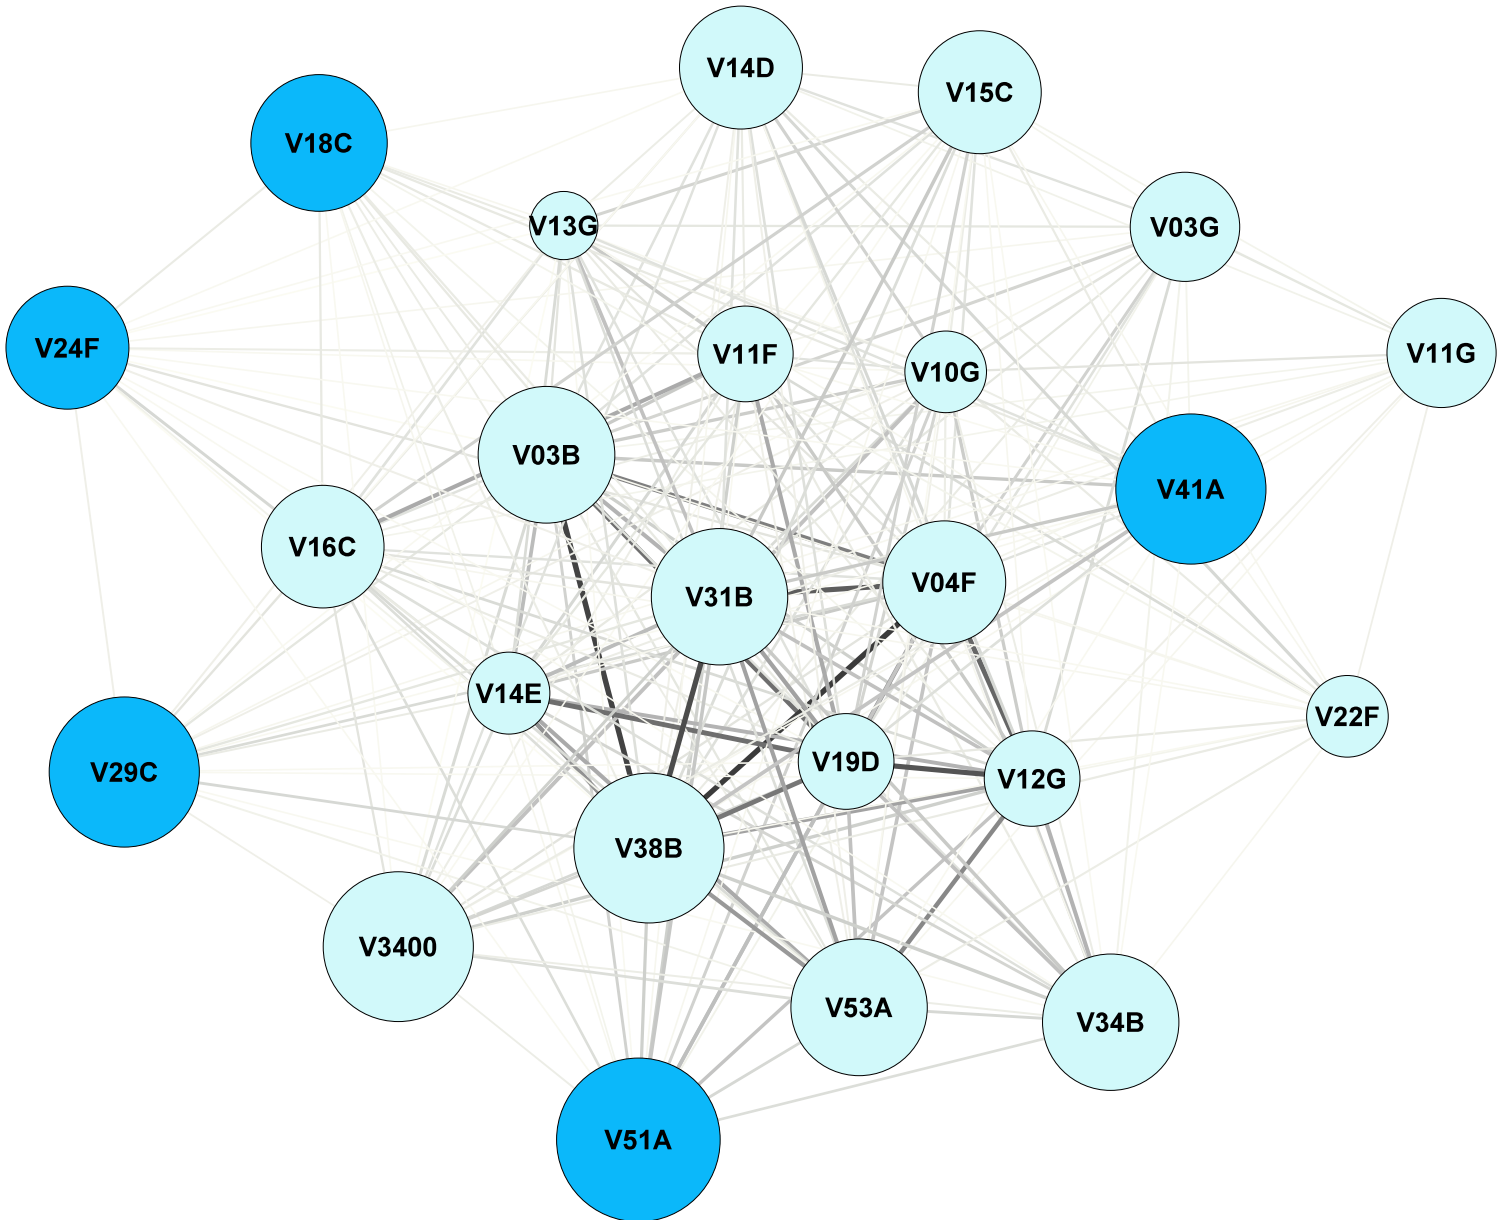

# Alpine ibex network spring 2009

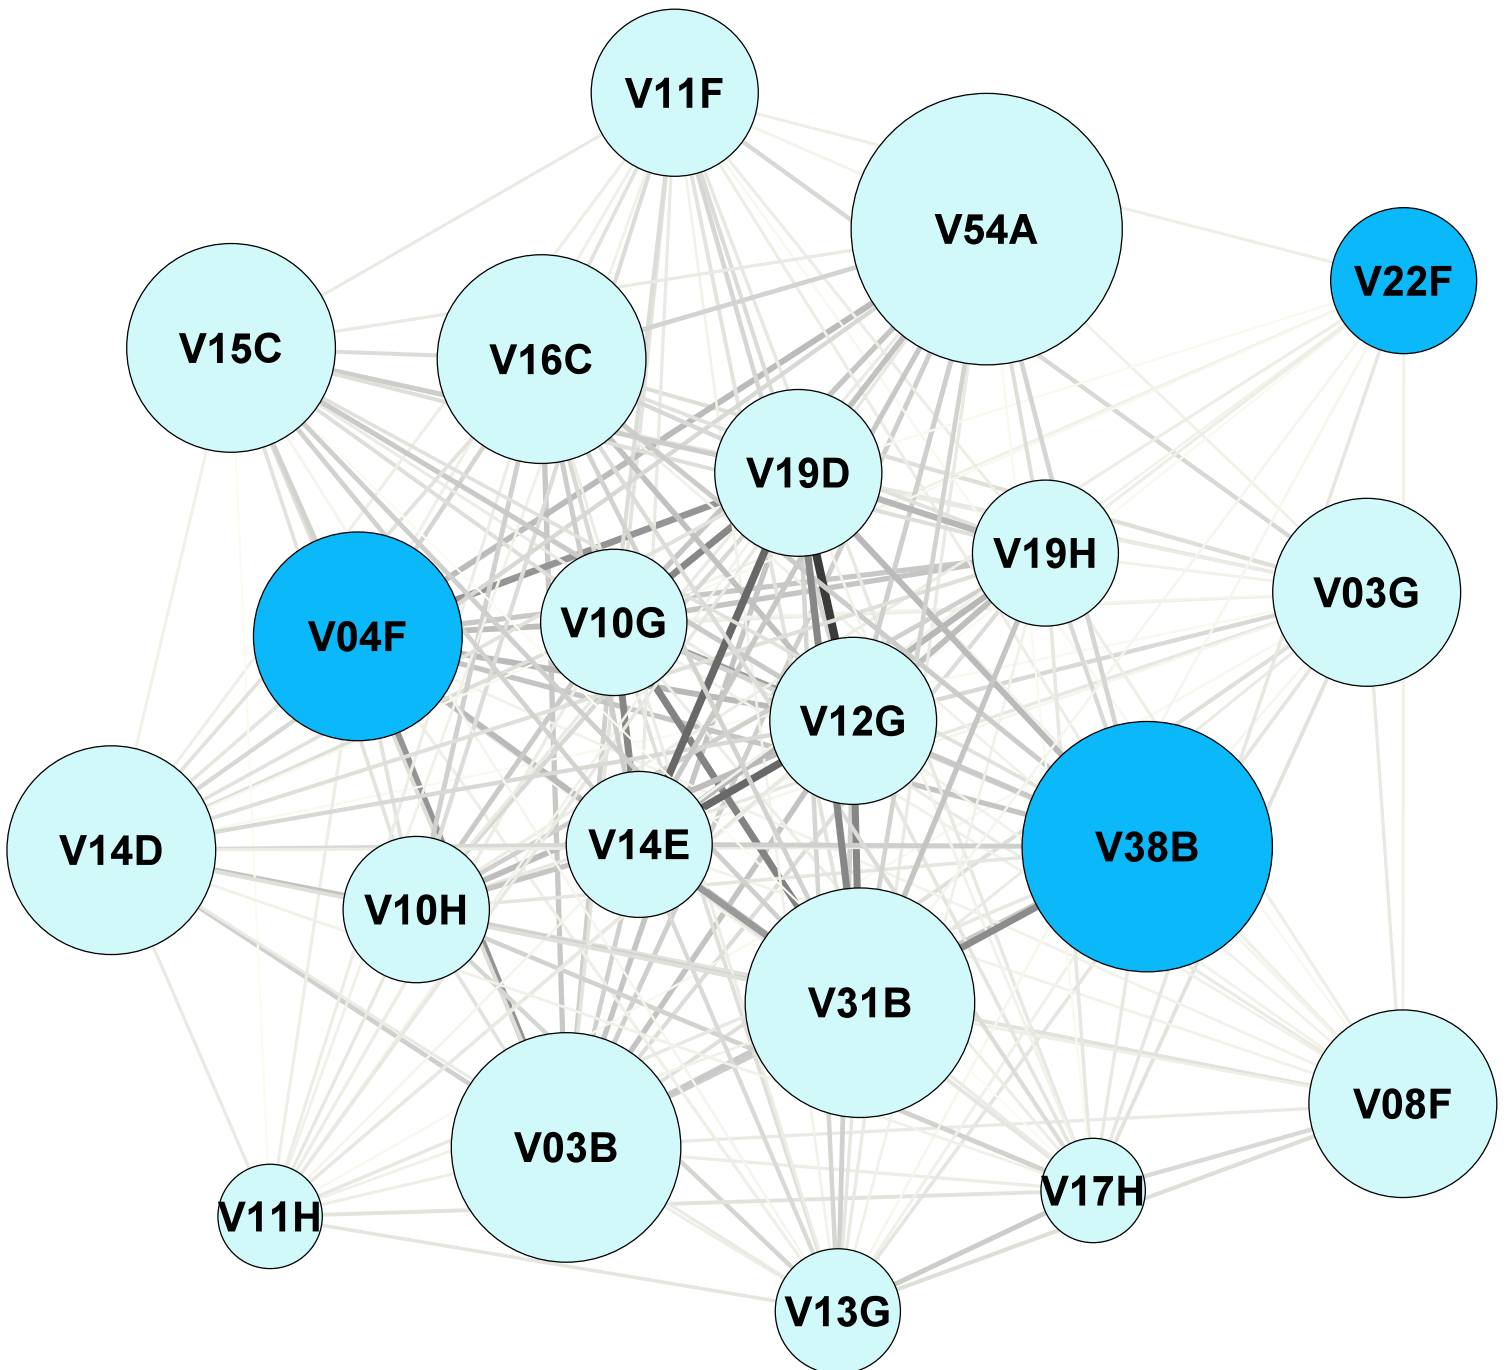

# Alpine ibex network summer 2009

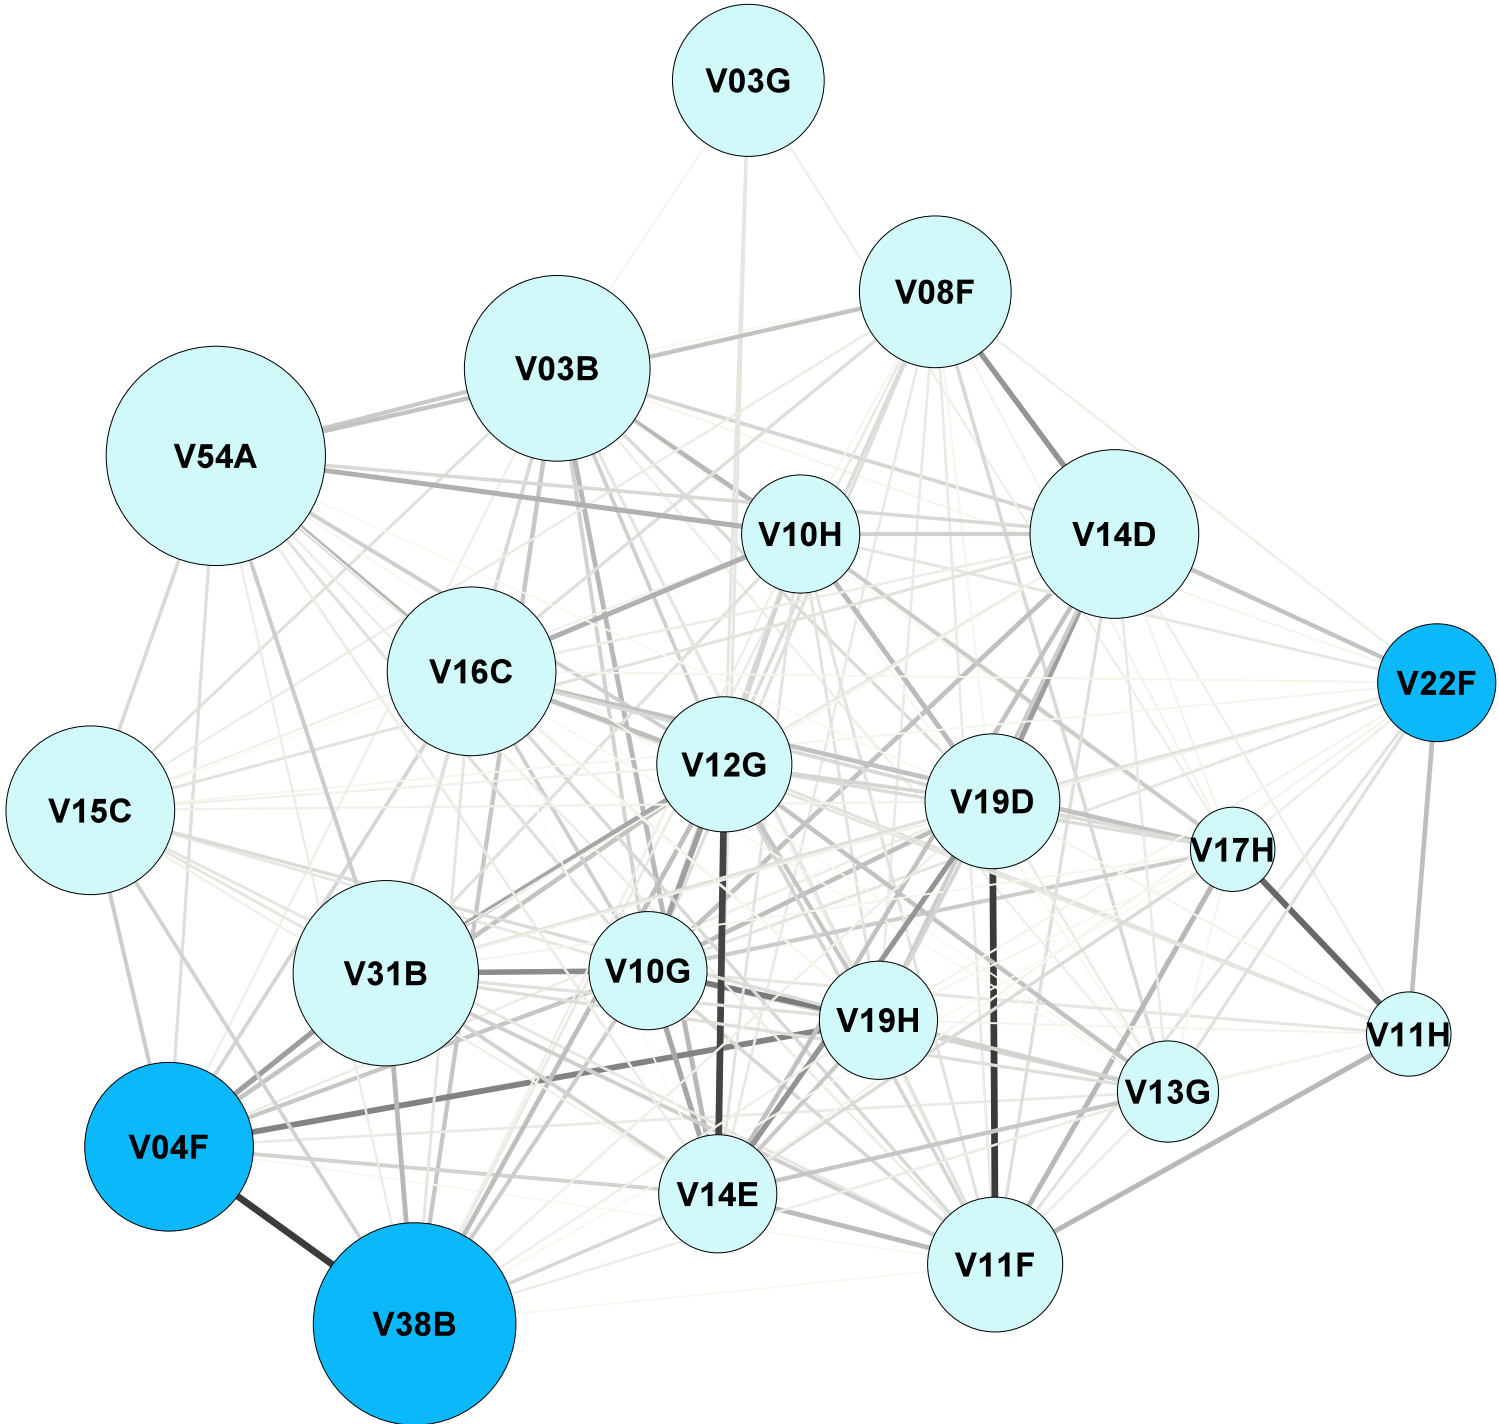



V03G

# Alpine ibex network spring 2010

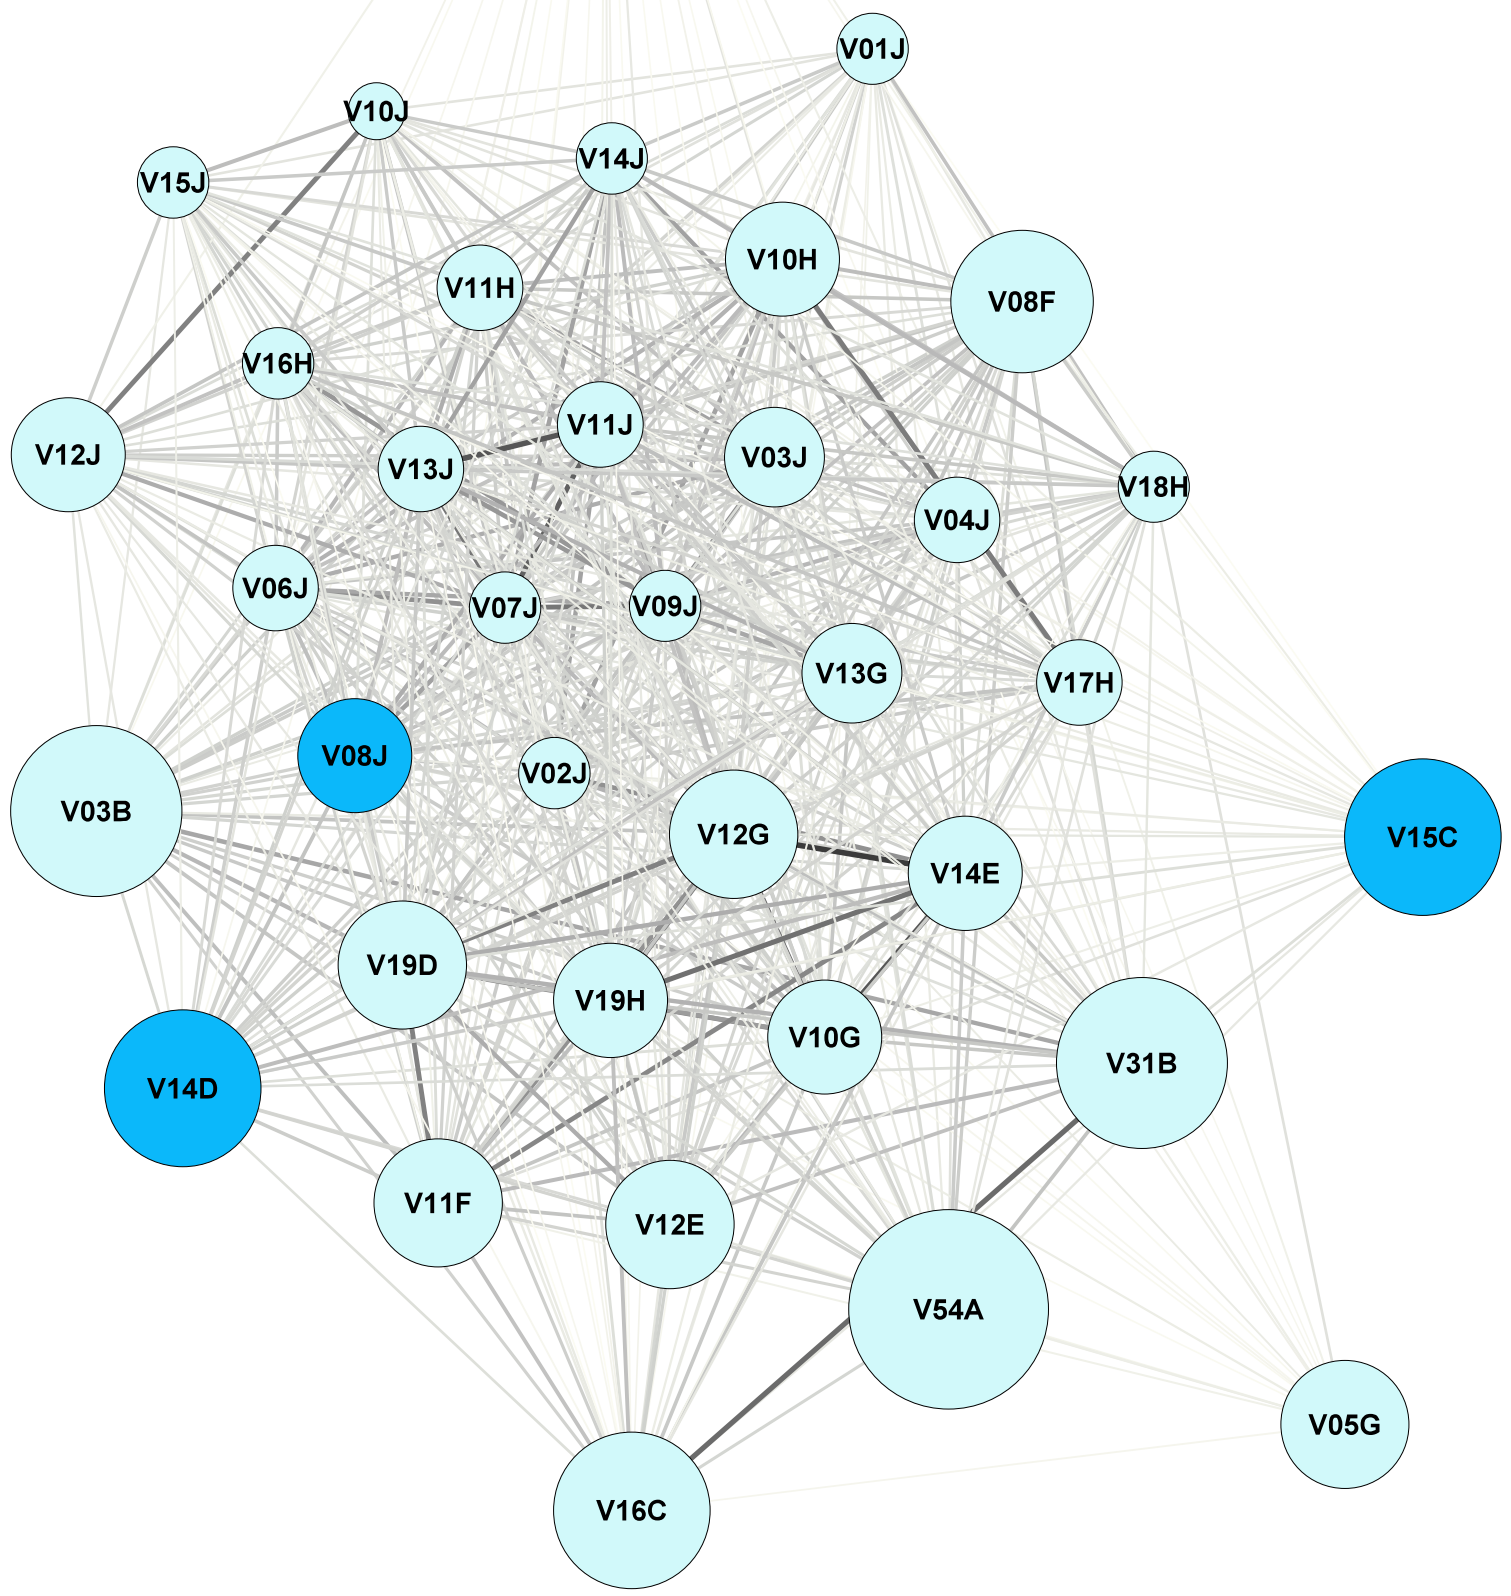

# Alpine ibex network summer 2010

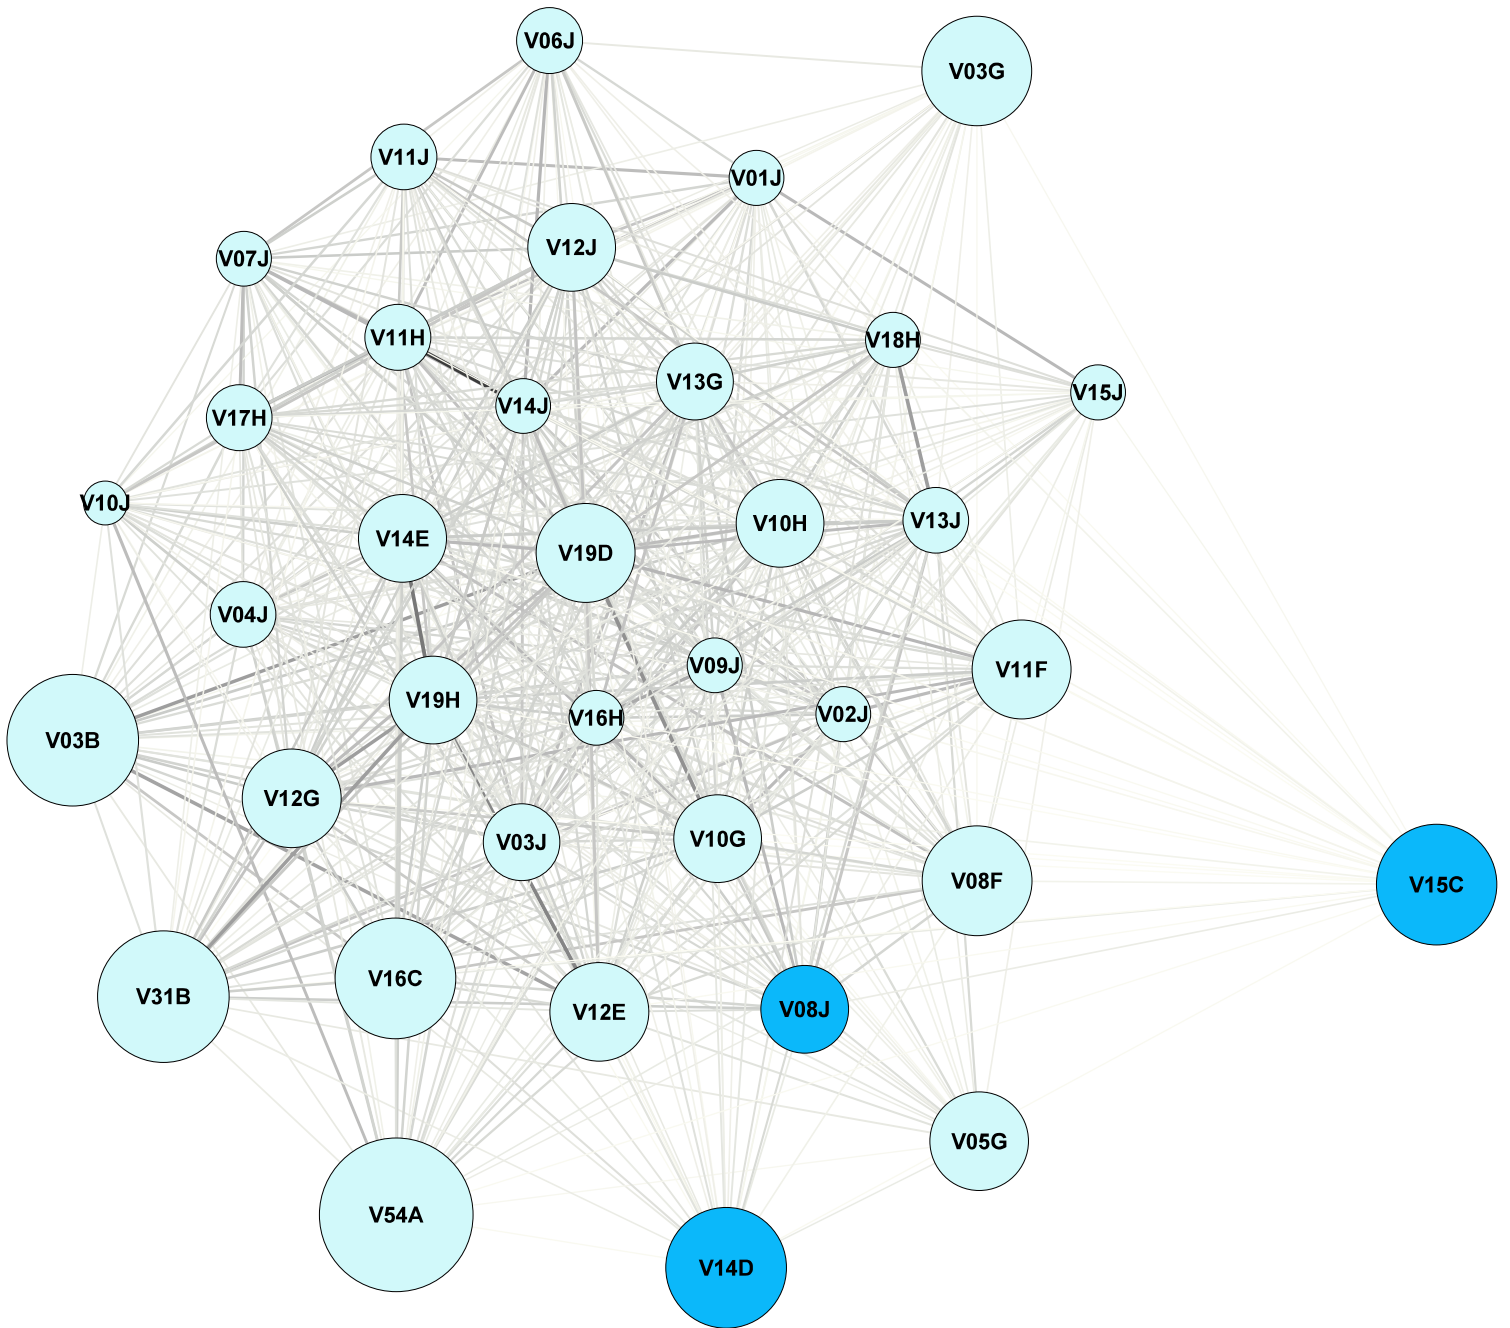



# Alpine ibex network spring 2011

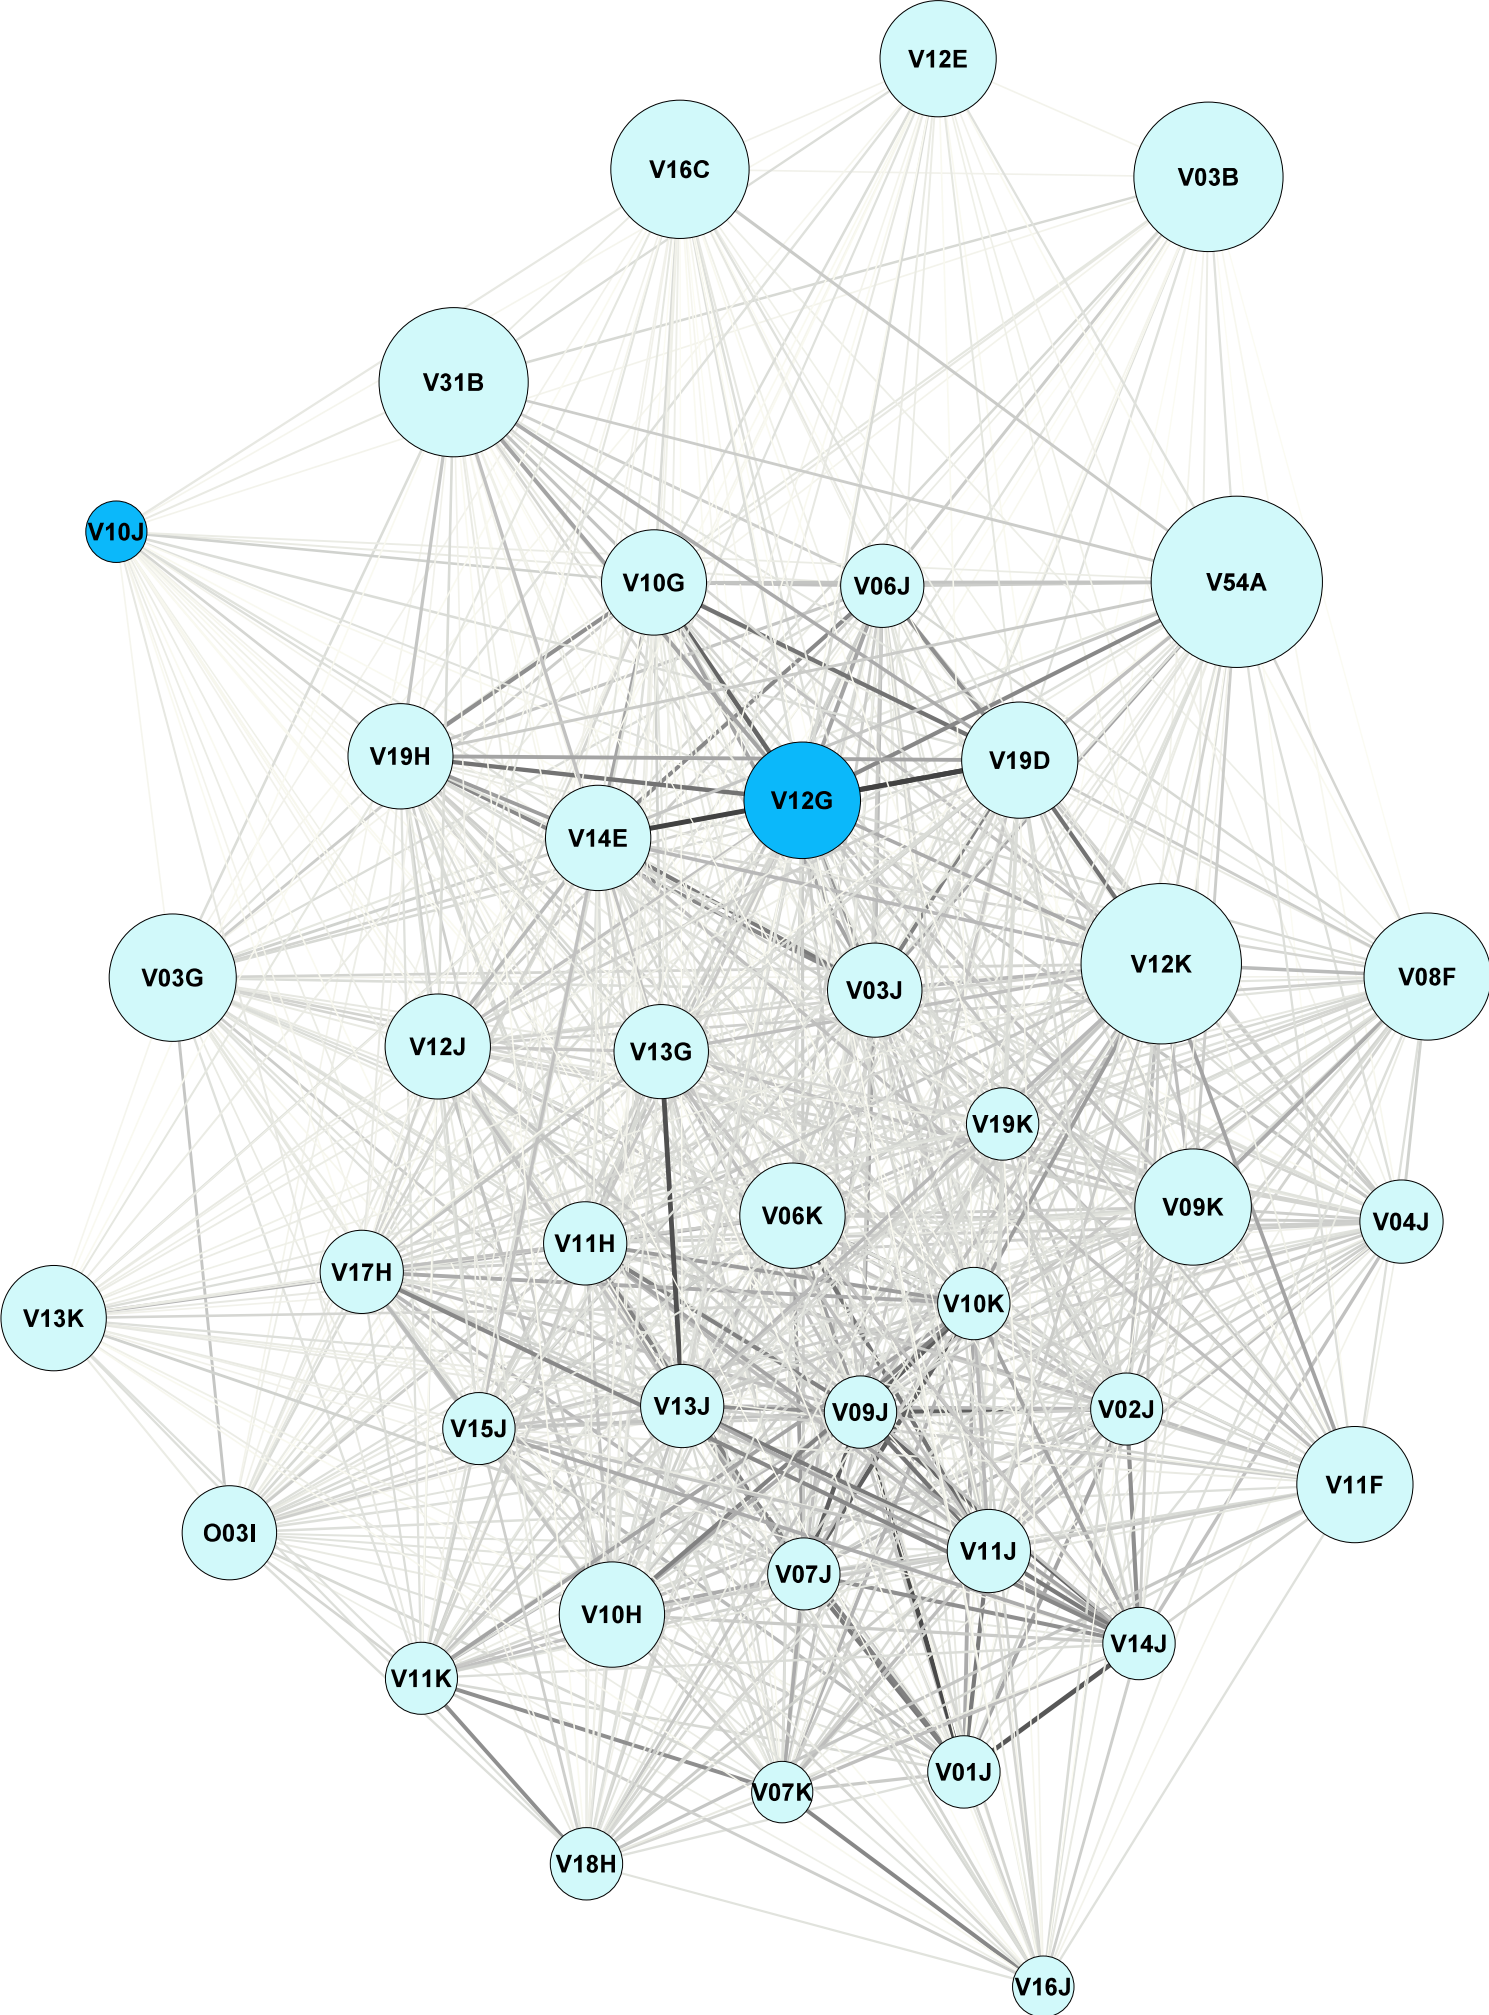



# Alpine ibex network summer 2011

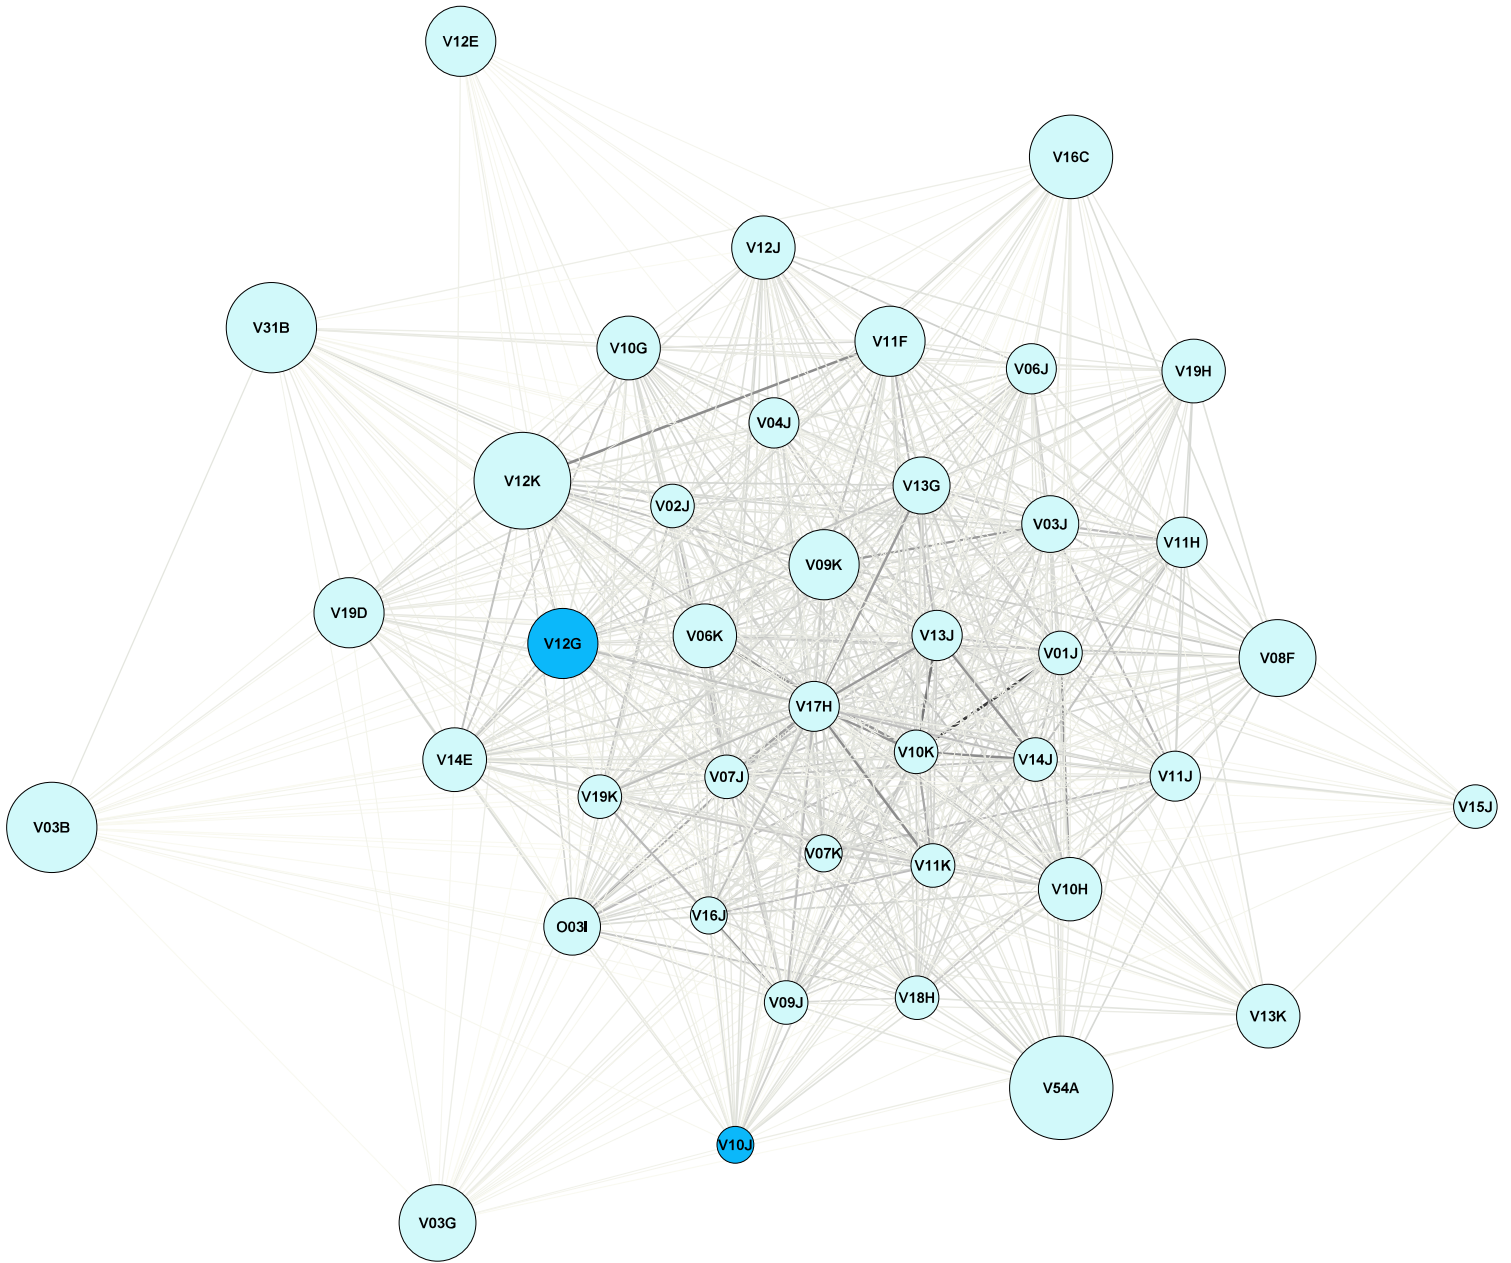

# Alpine ibex network spring 2012

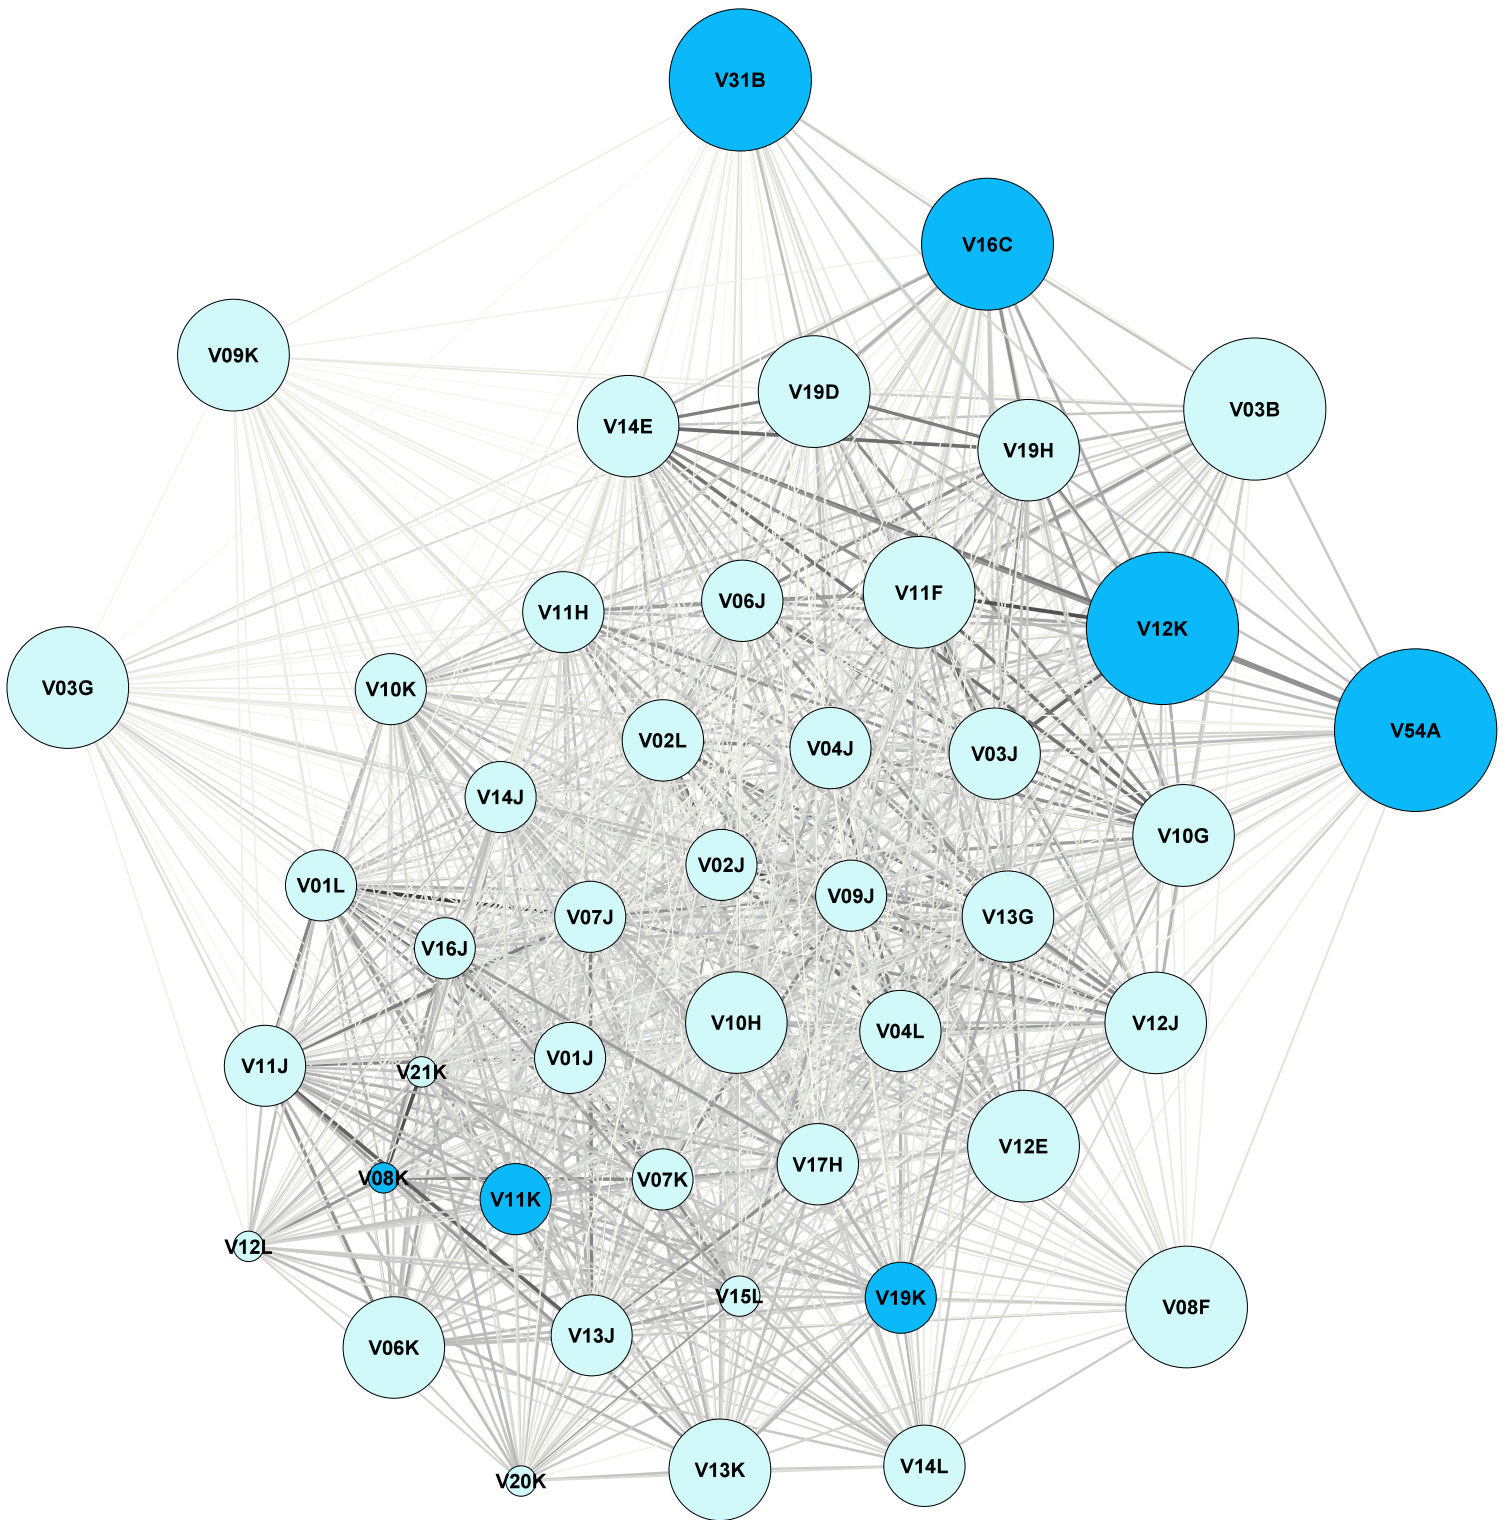



# Alpine ibex network summer 2012

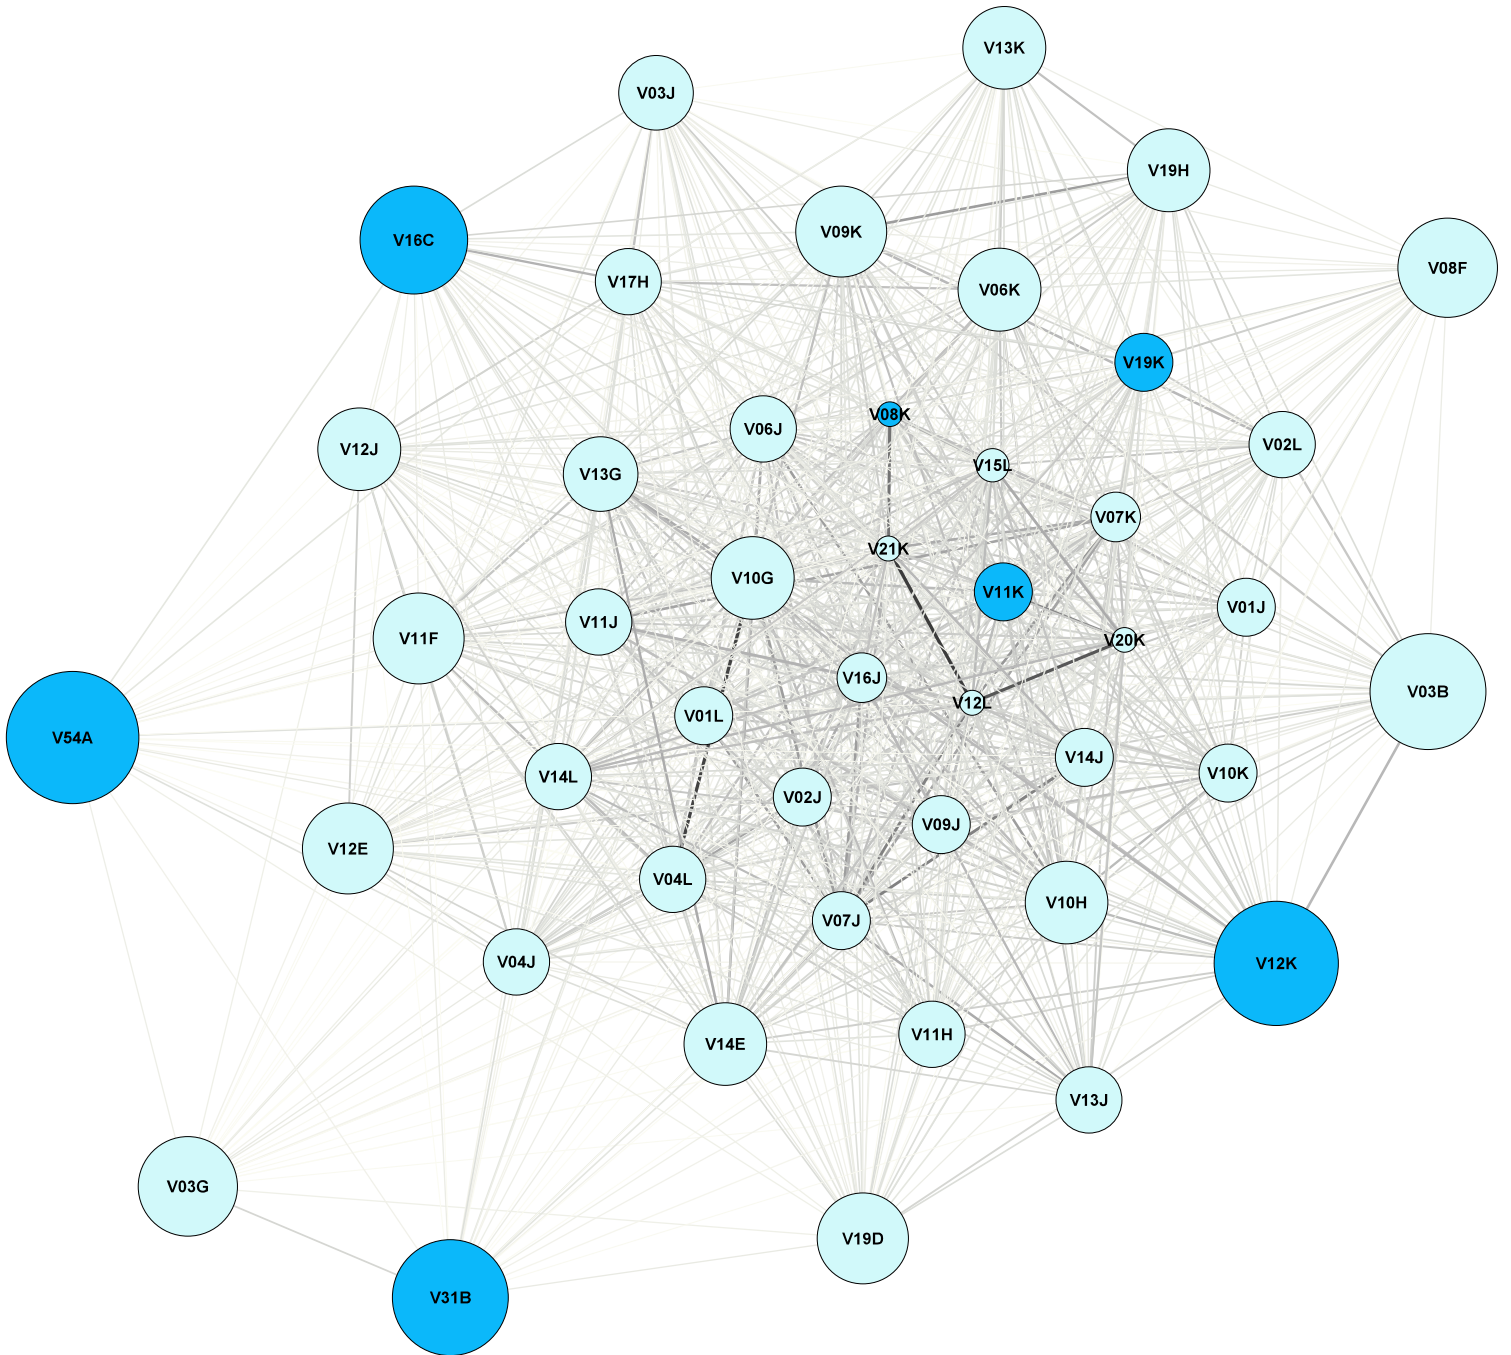

# Alpine ibex network spring 2013

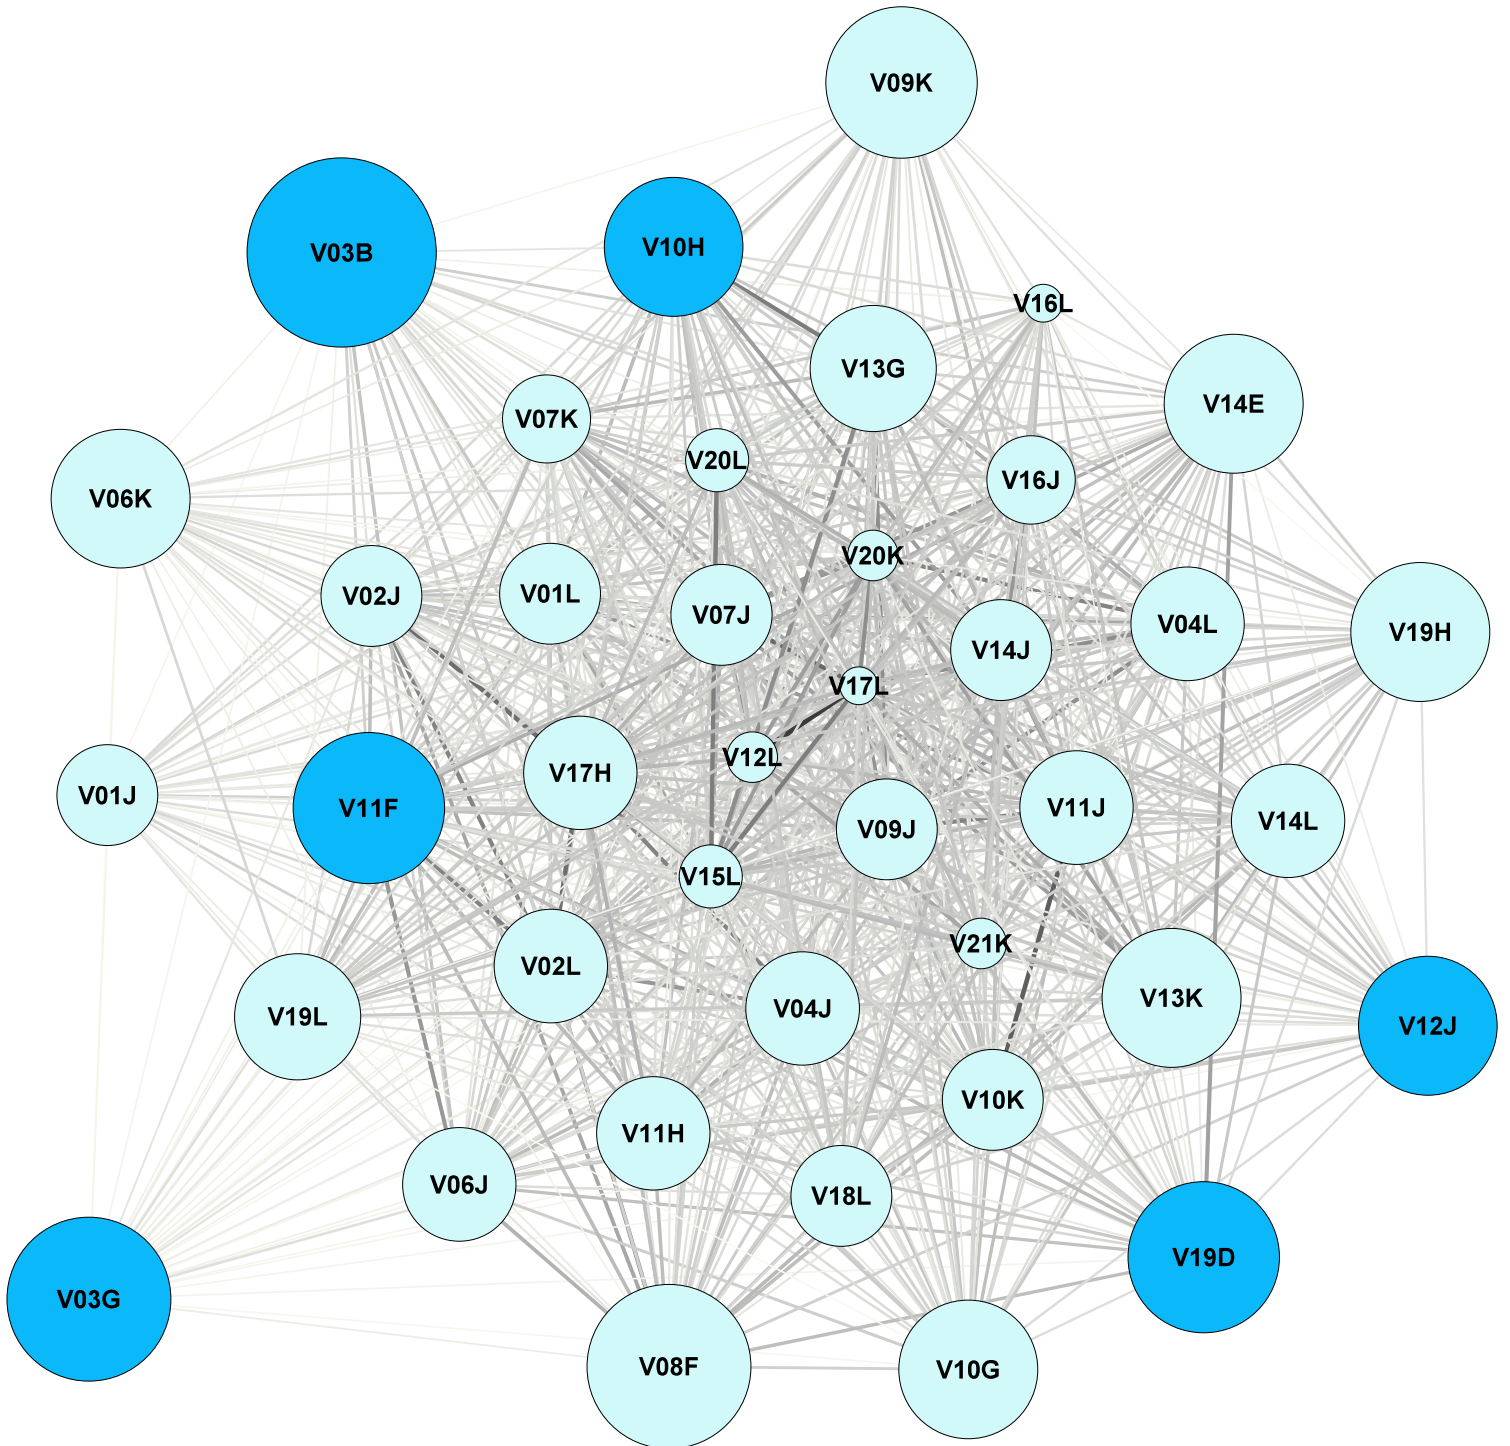



# Alpine ibex network summer 2013

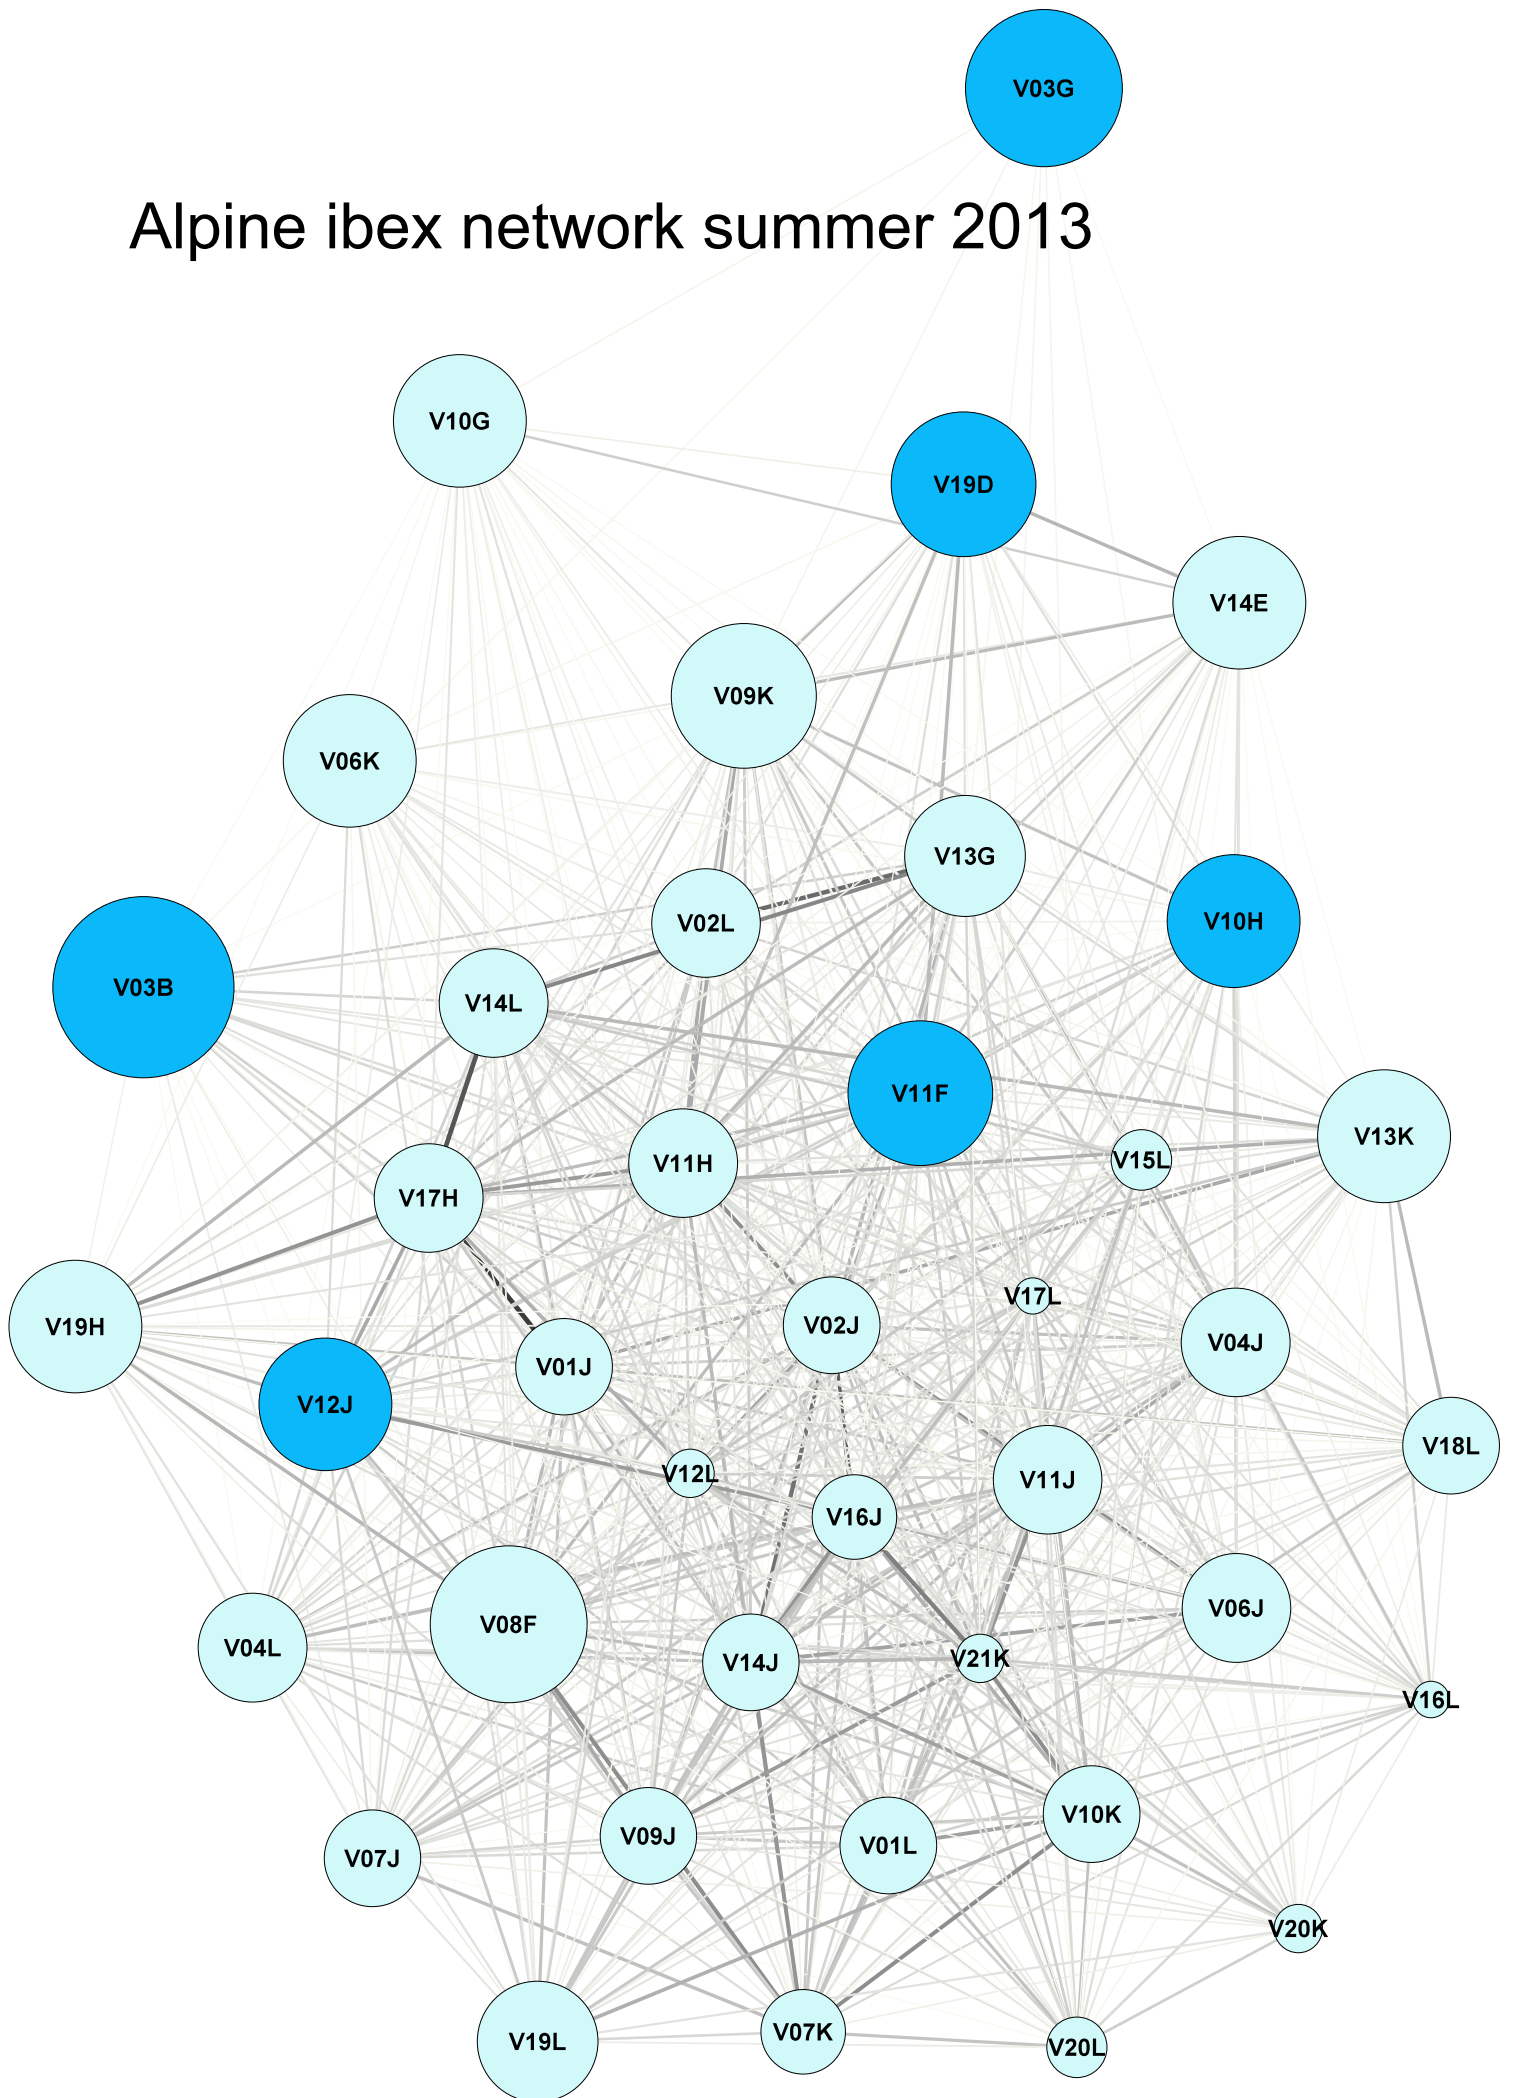

# Alpine ibex network spring 2014

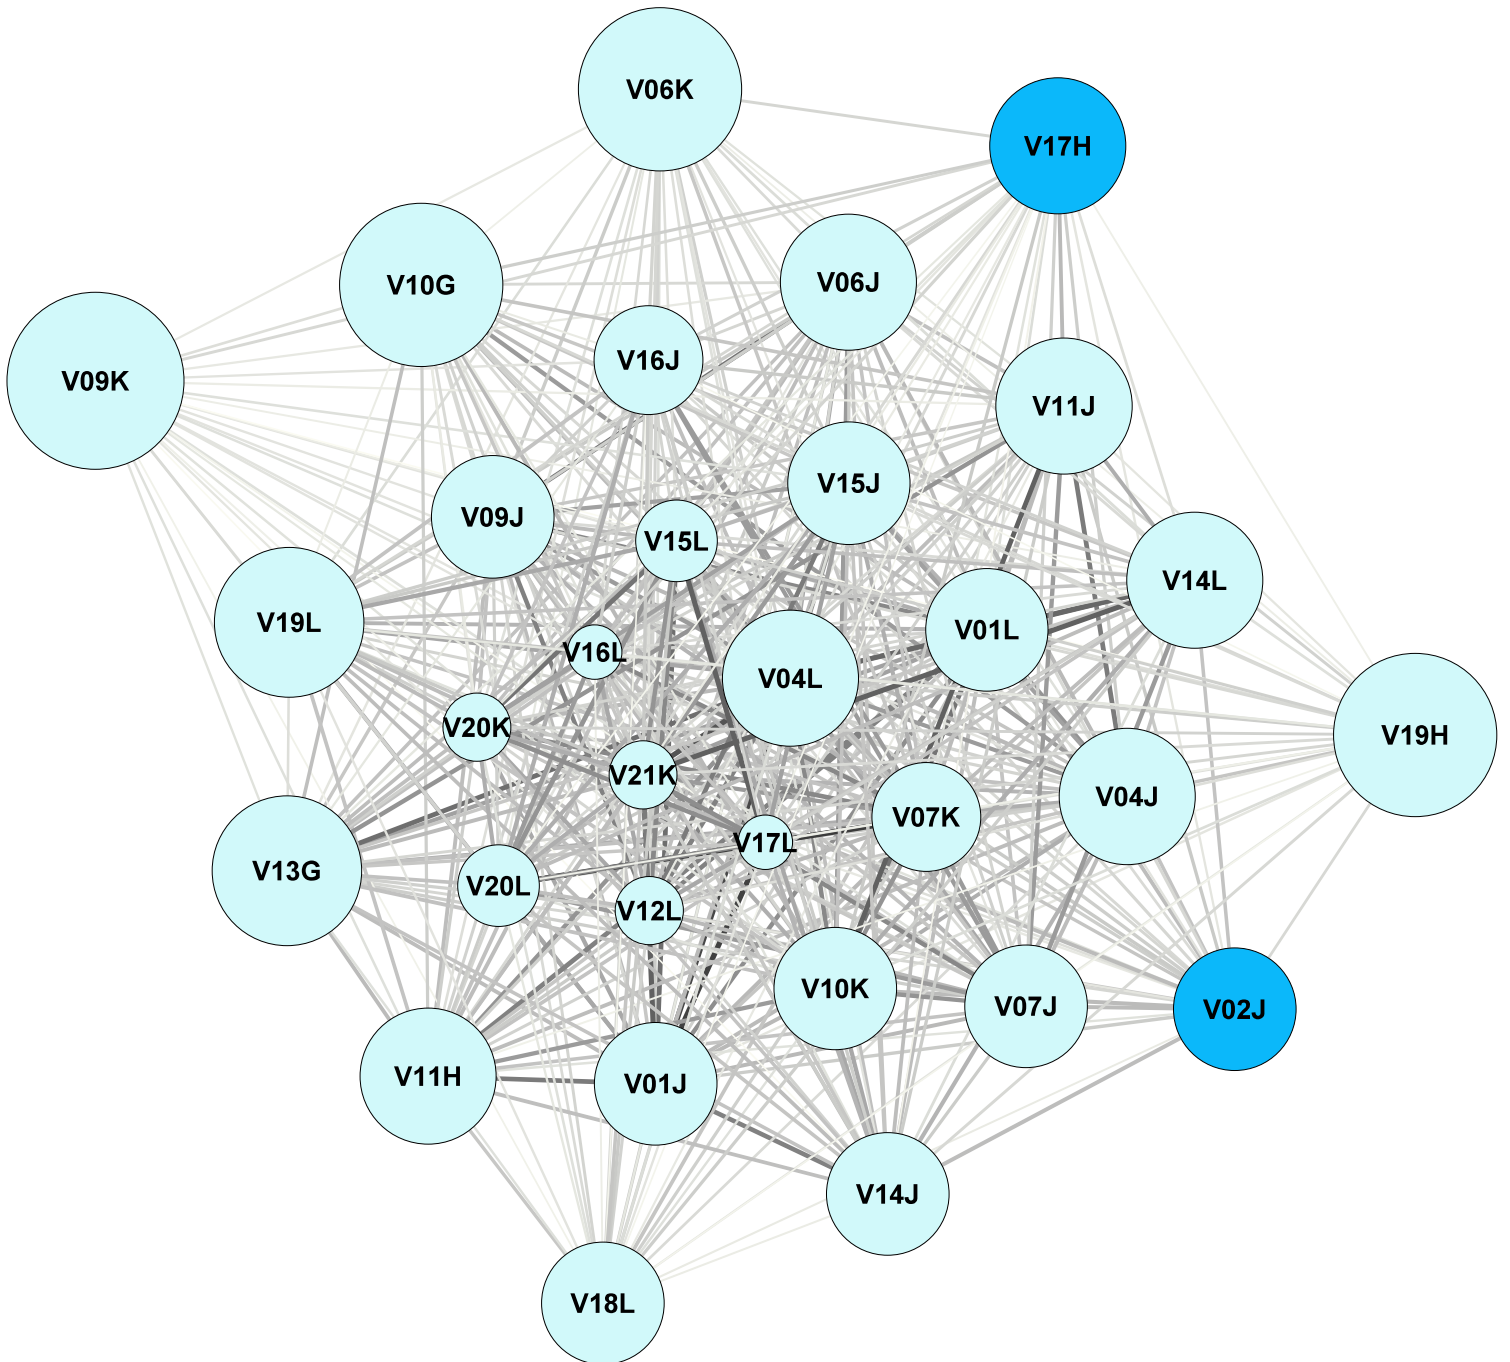

# Alpine ibex network summer 2014

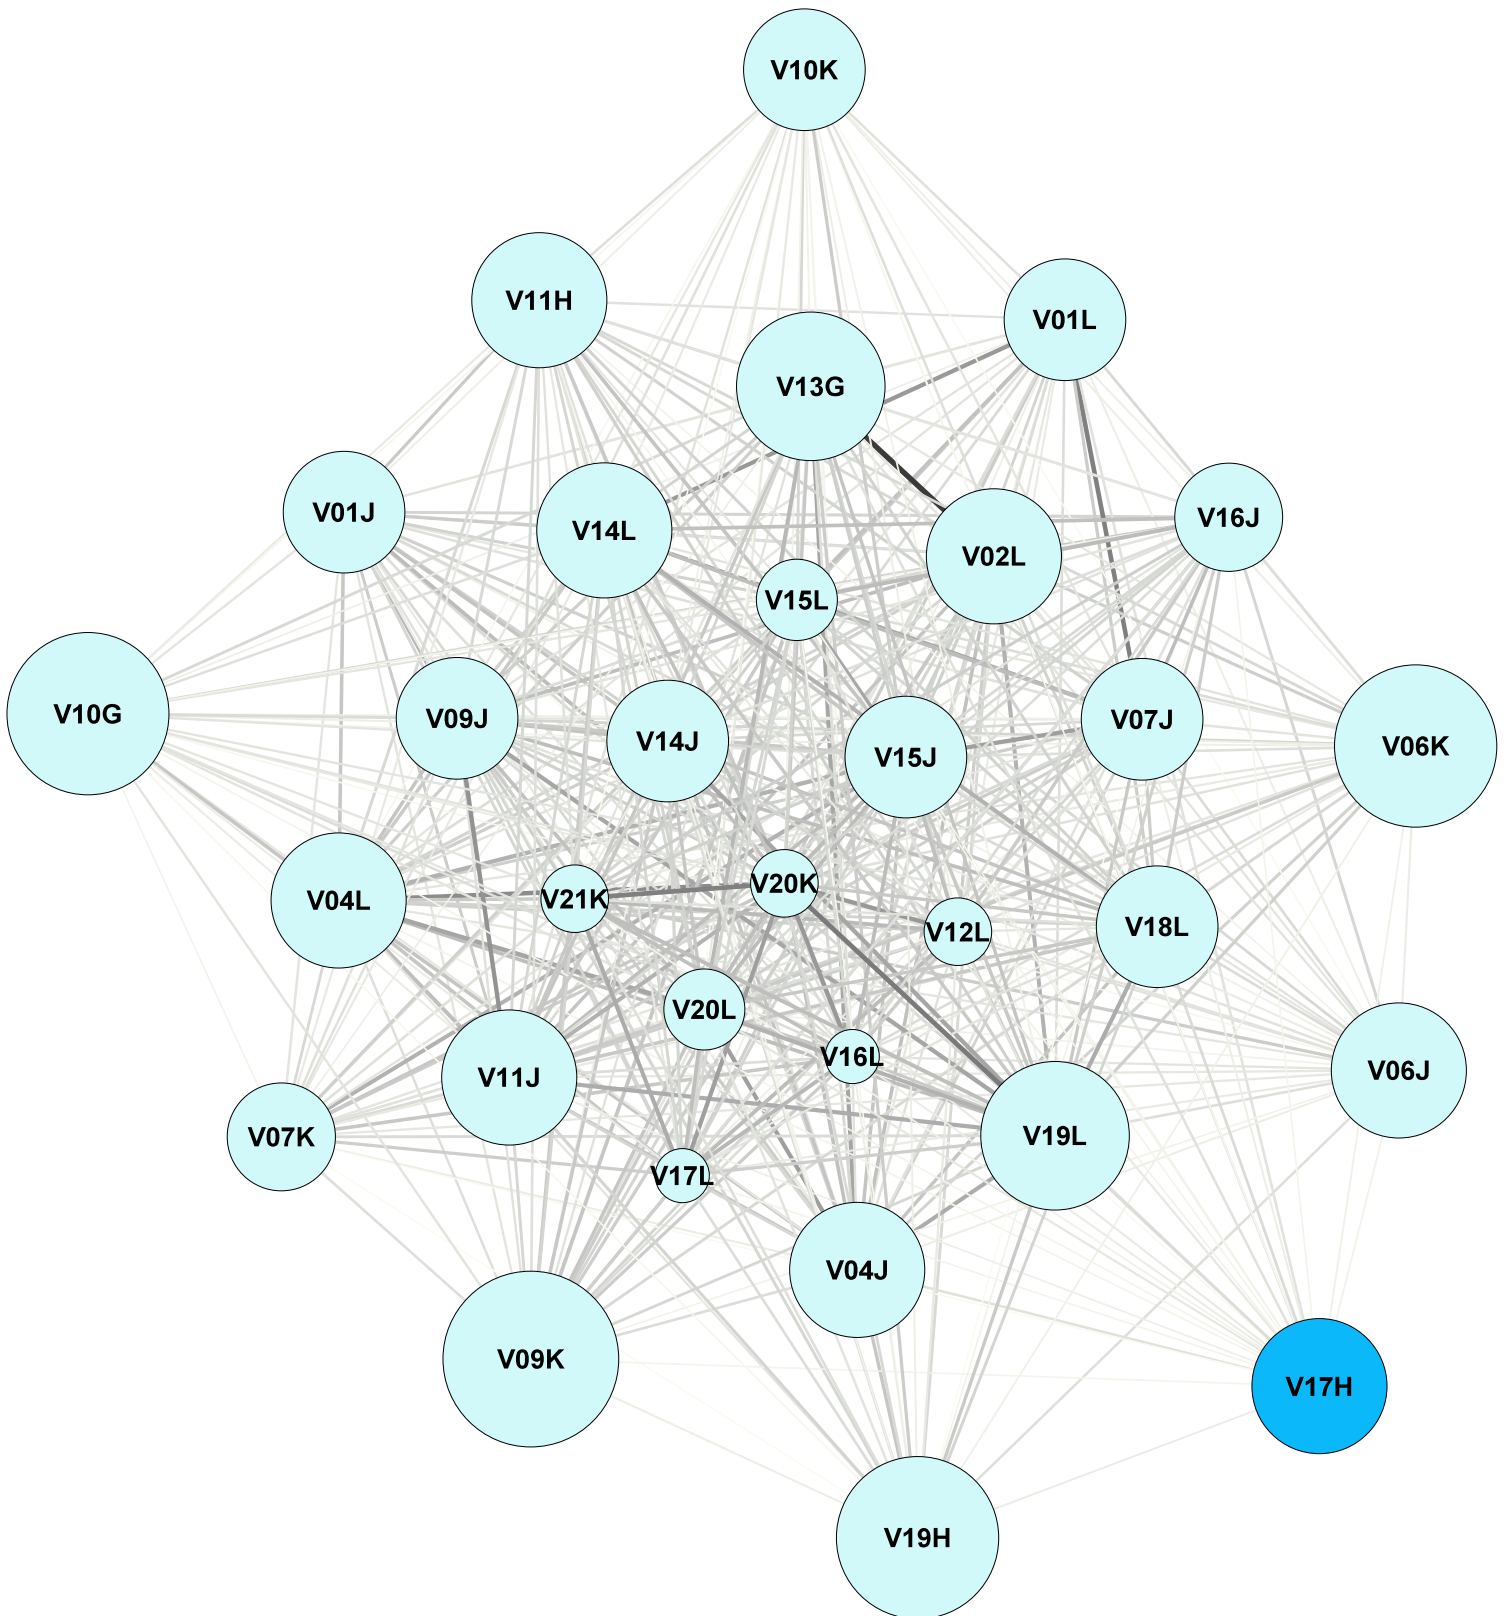



# Alpine ibex network spring 2015

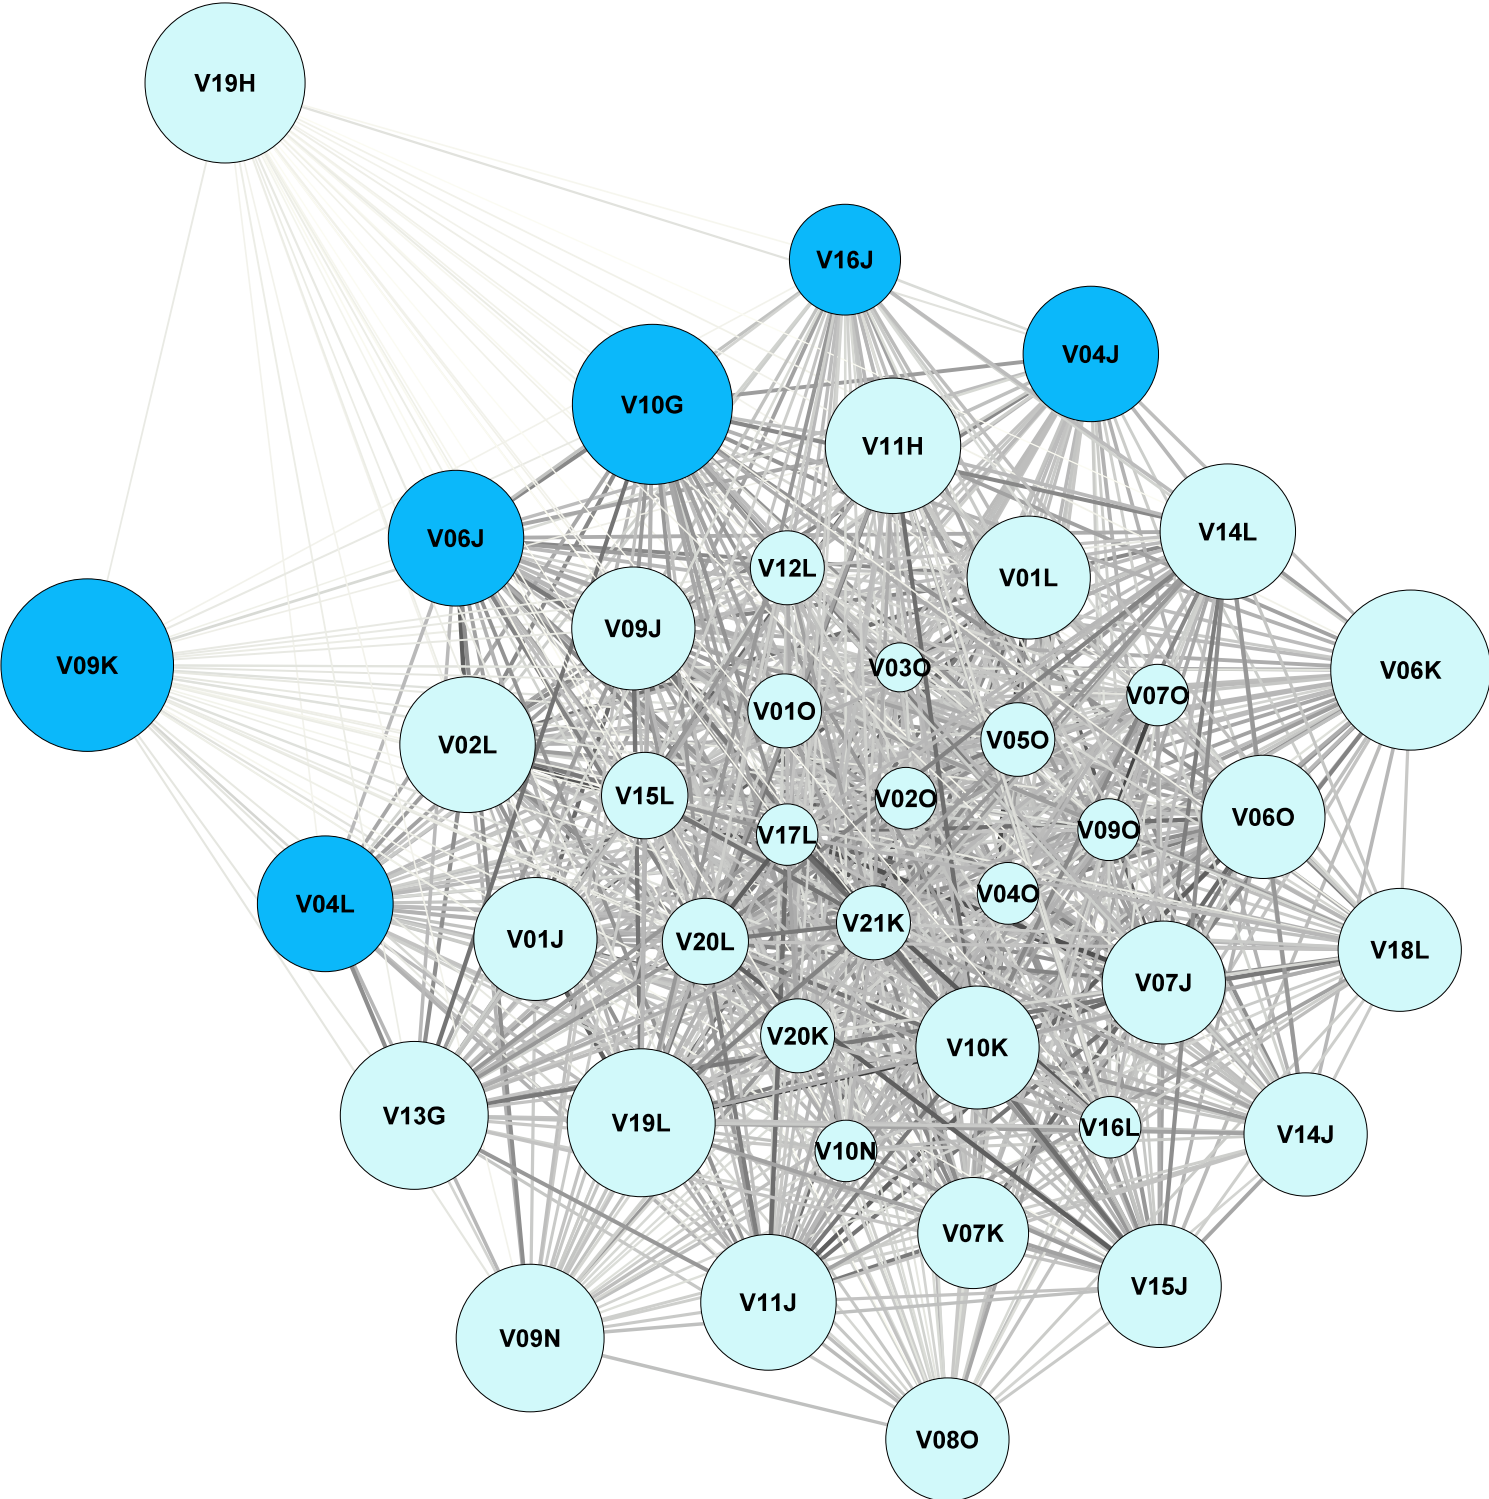



# Alpine ibex network summer 2015

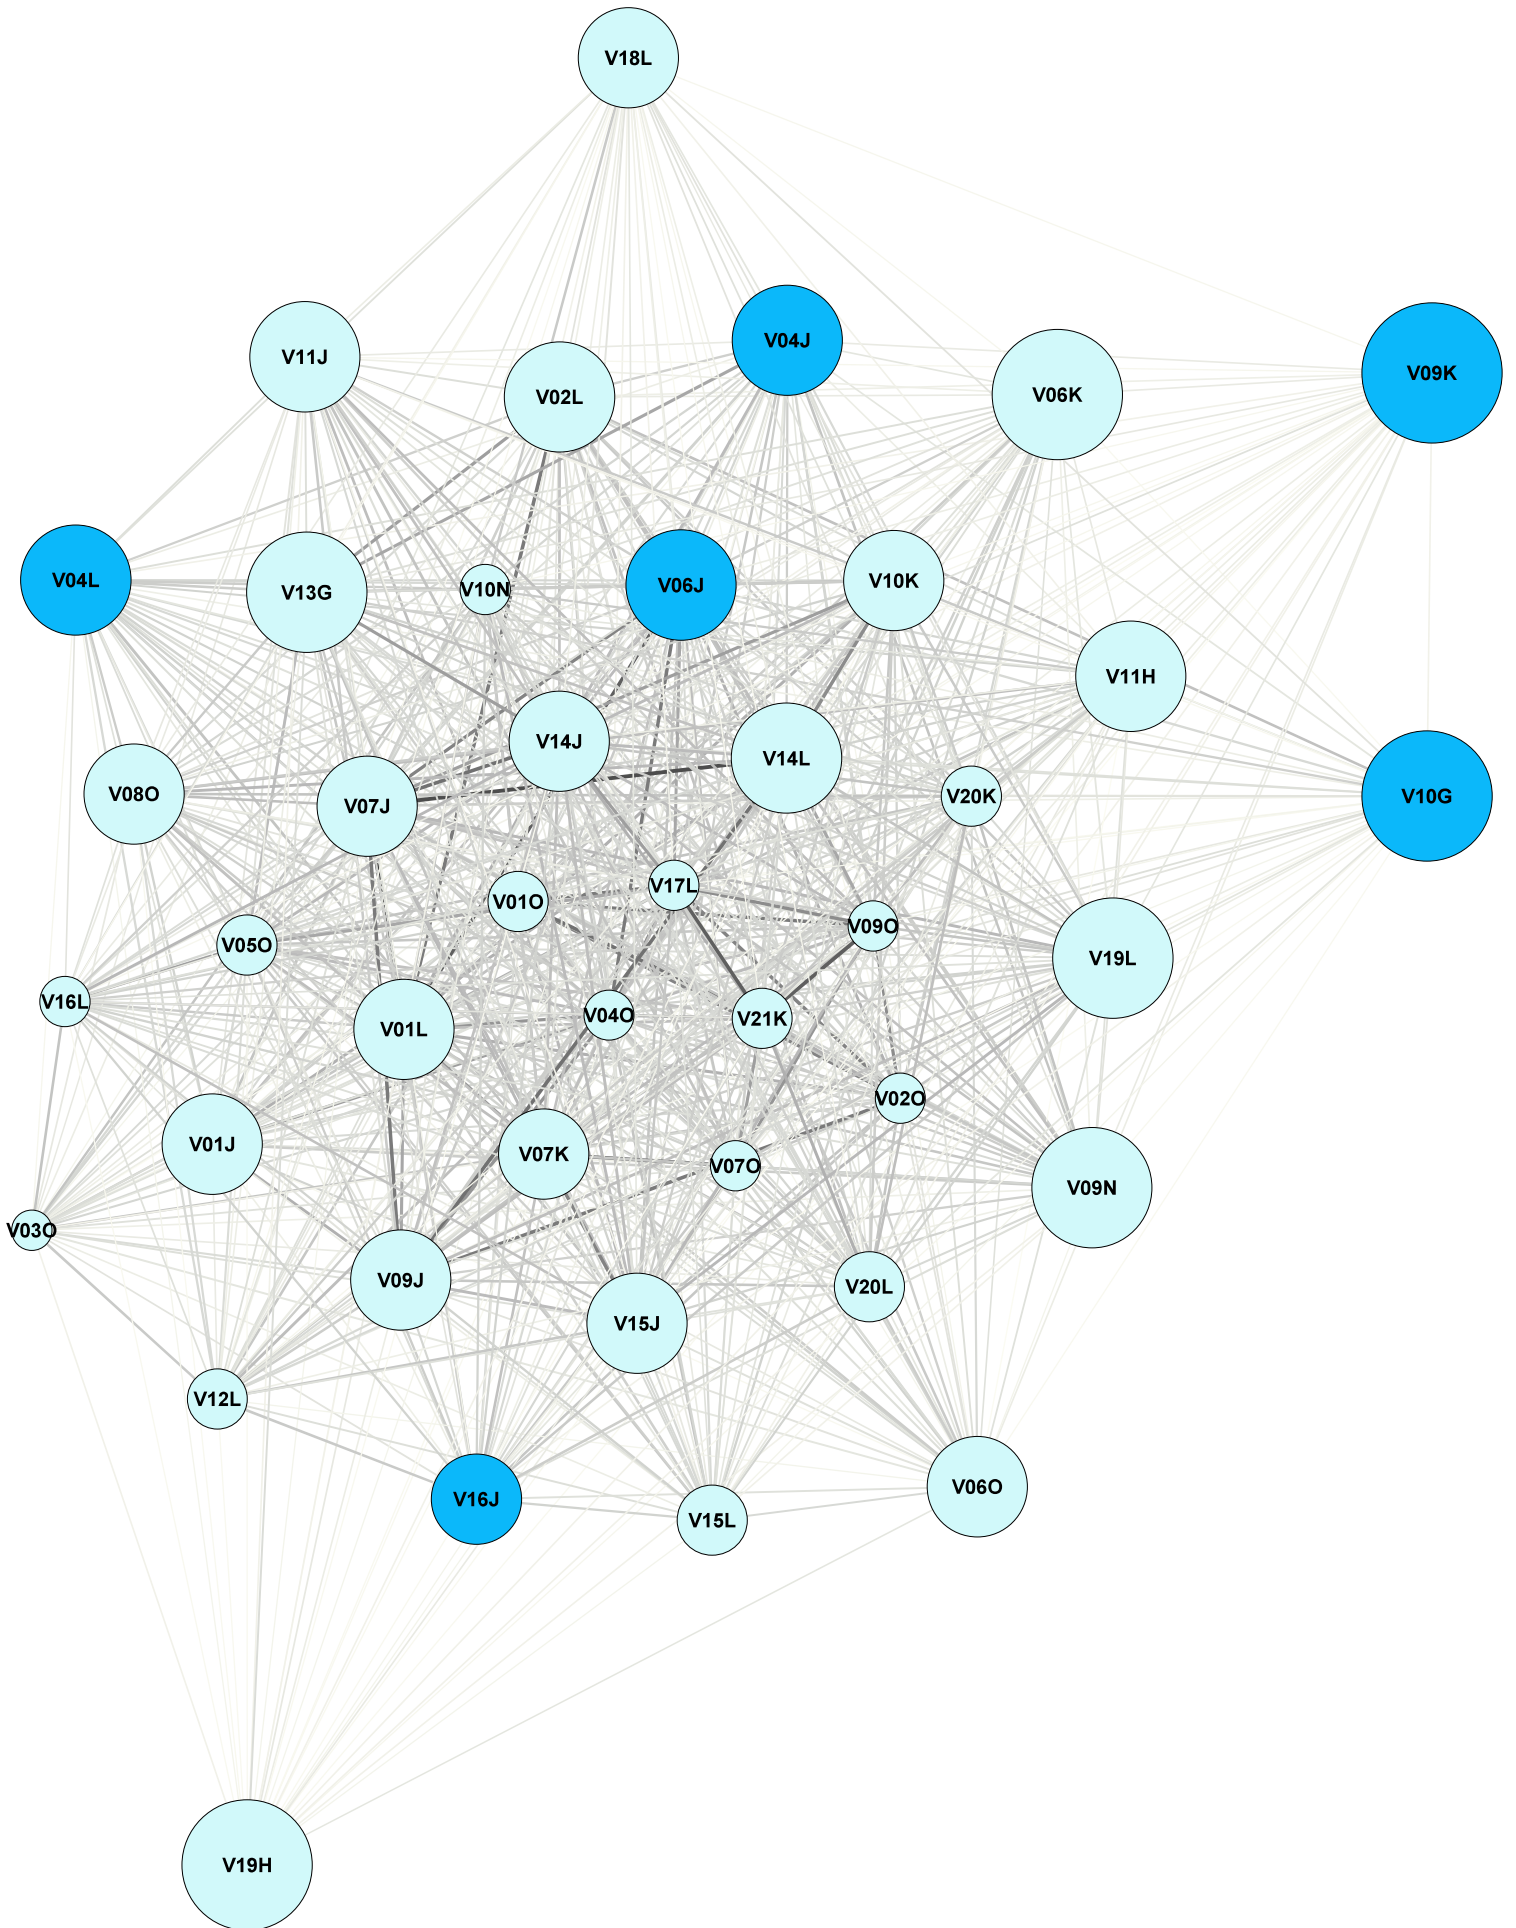

# Alpine ibex network spring 2016

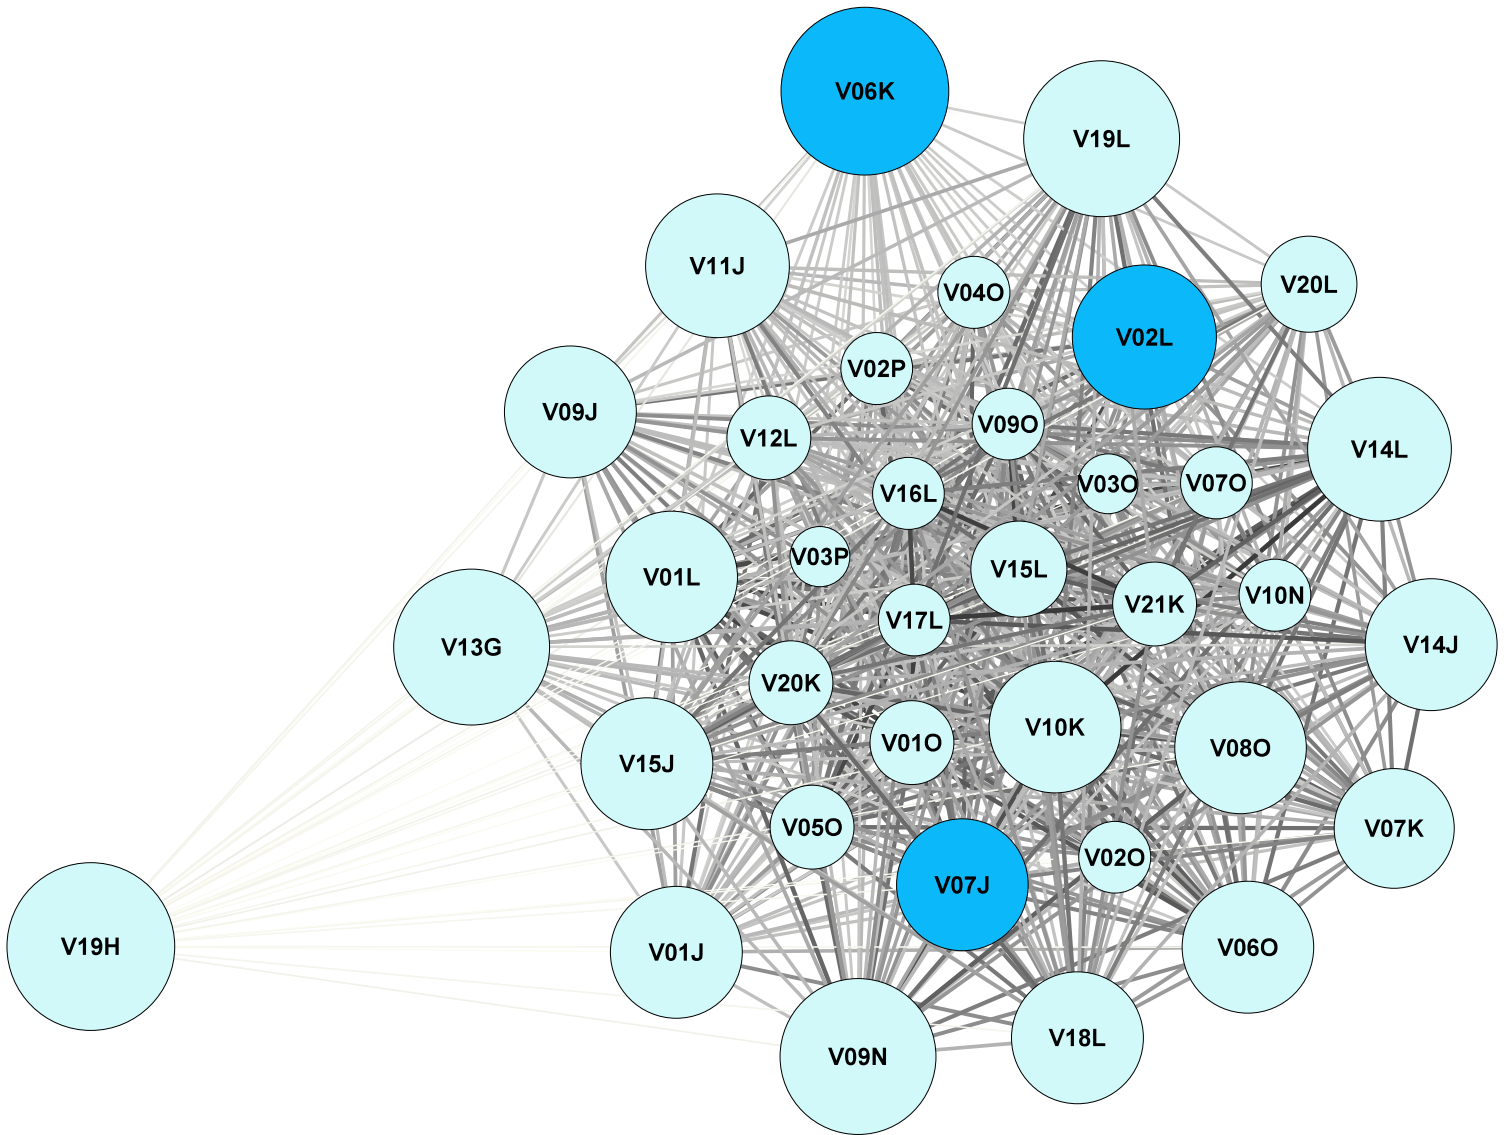

# Alpine ibex network summer 2016

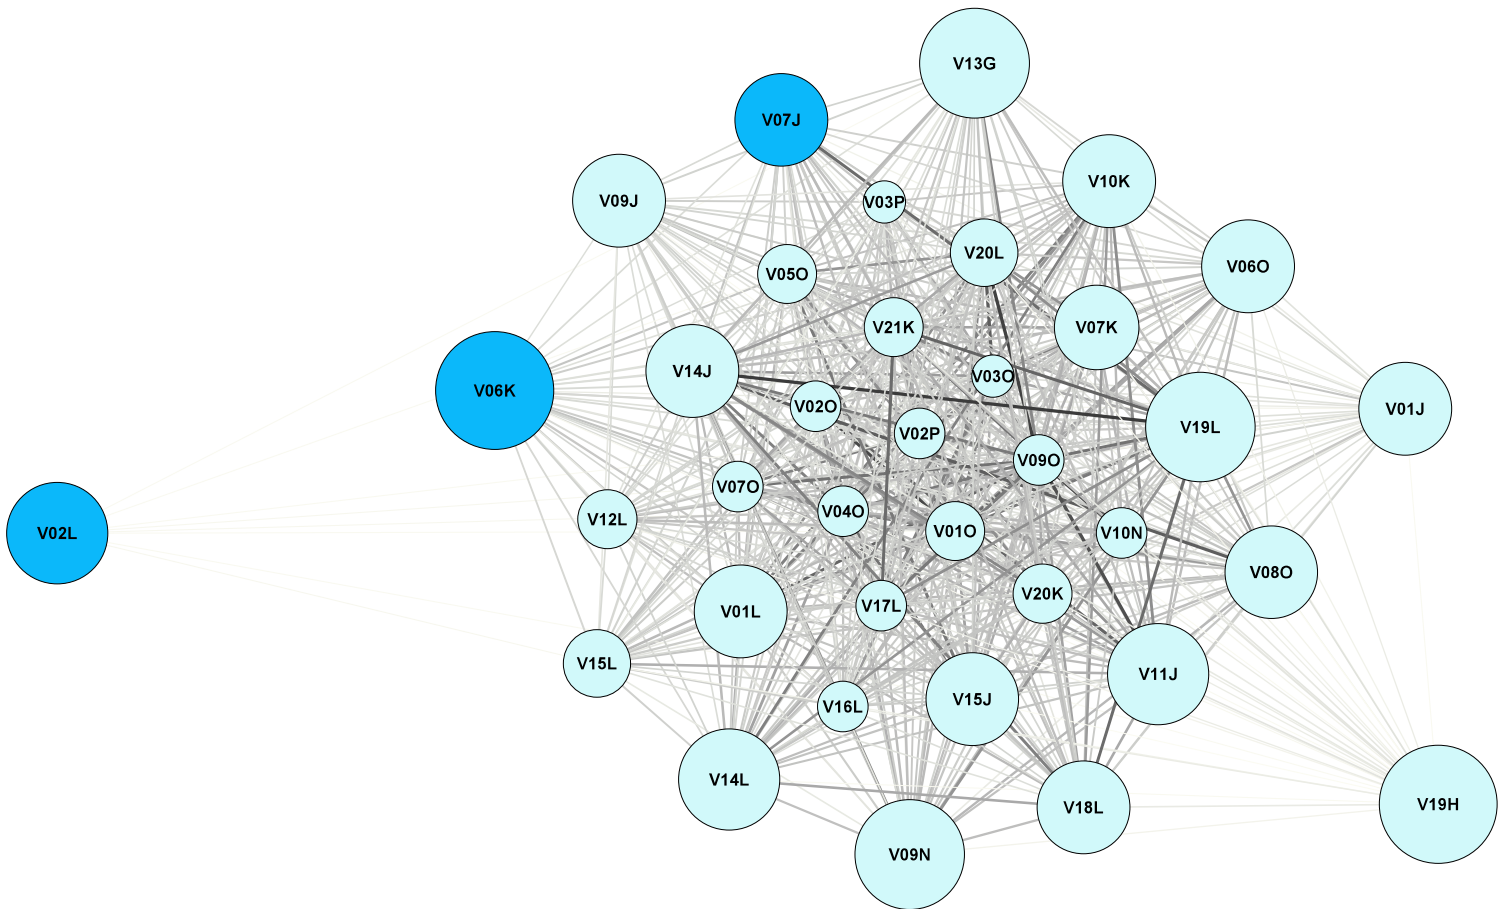



# Alpine ibex network spring 2017

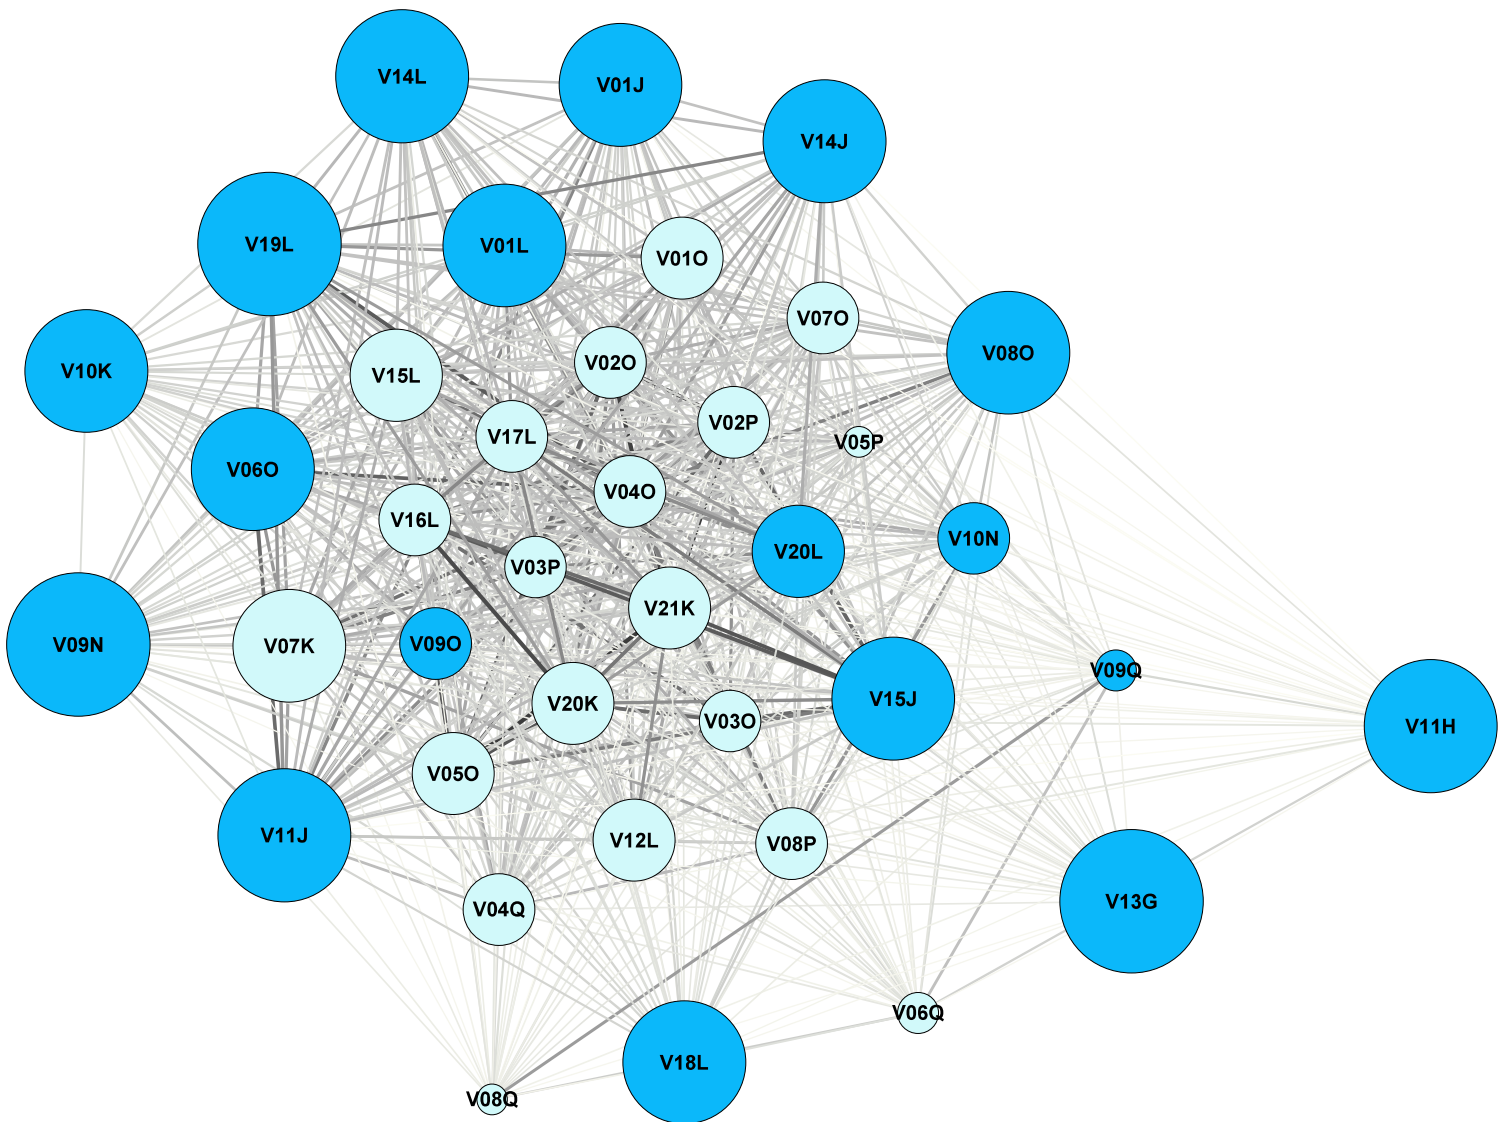



# Alpine ibex network summer 2017

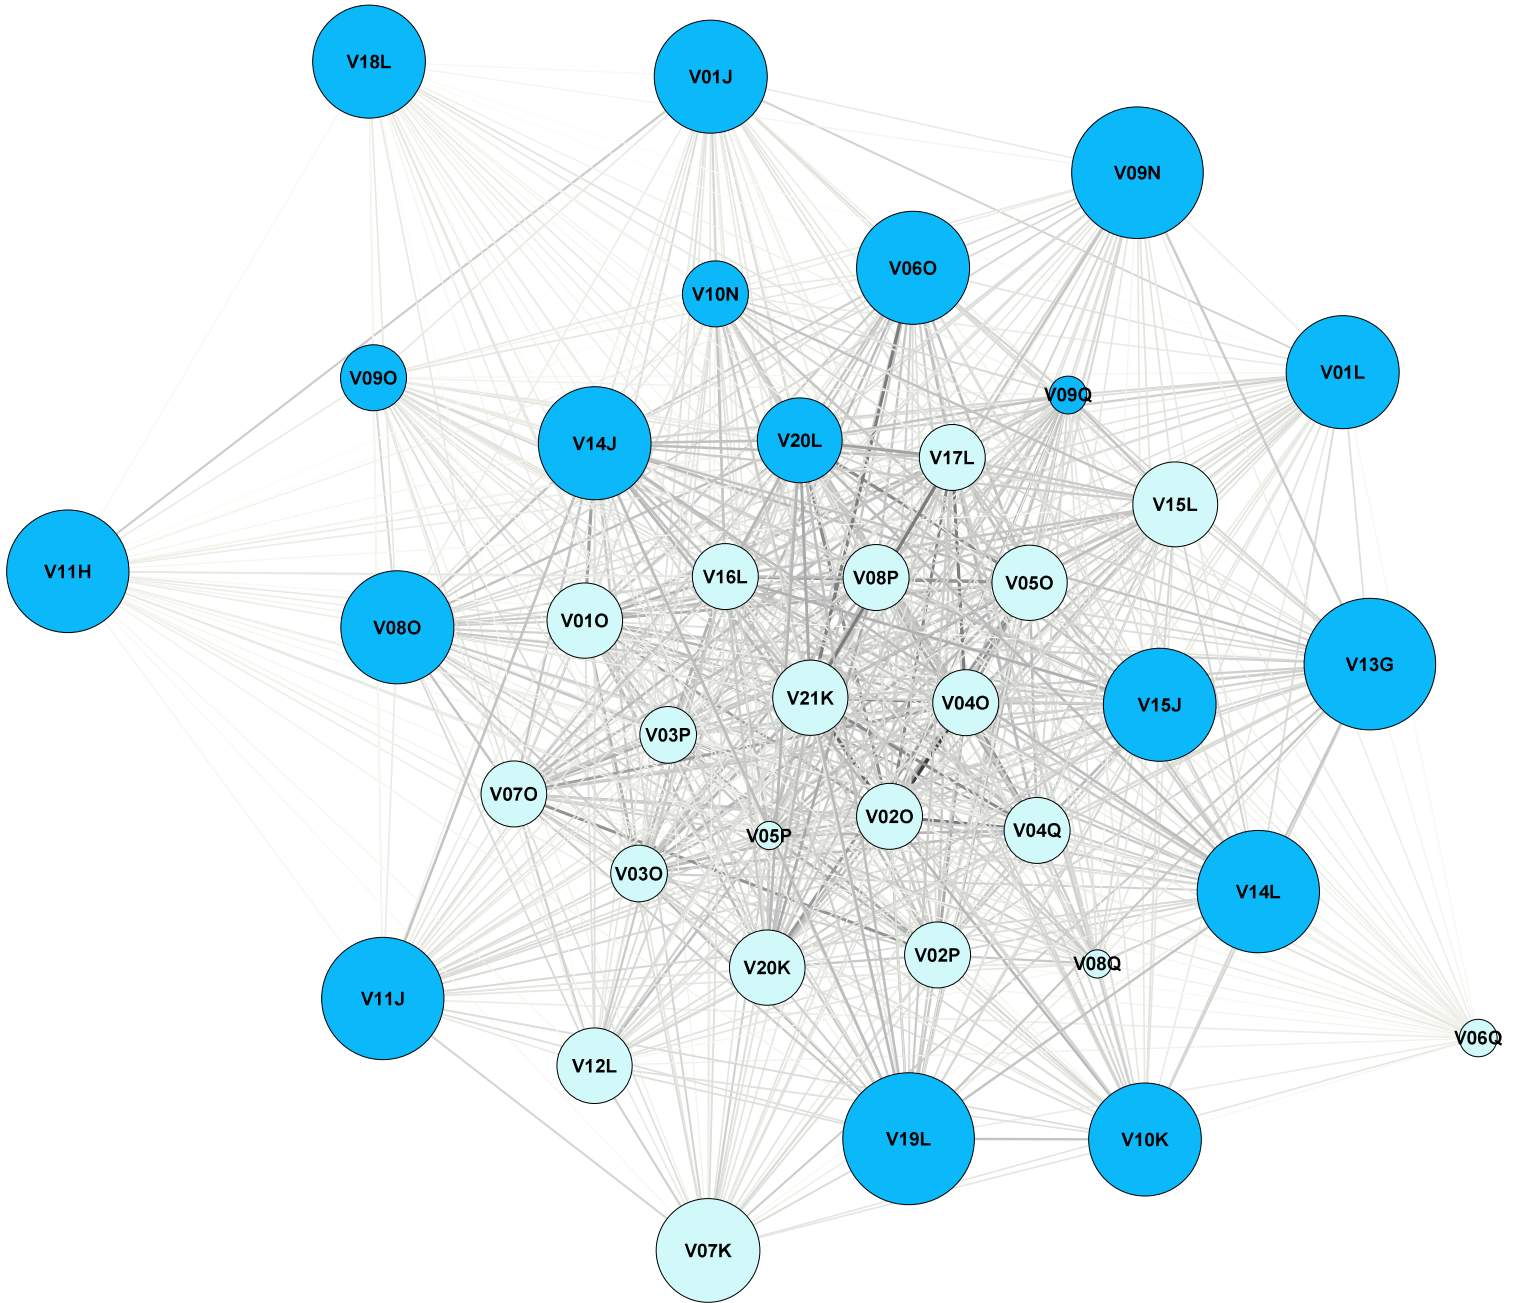

Supplement: Supplementary file [file media-2.pdf]
